# Supplementary material for: Cohort profile: Understanding Pregnancy Signals and Infant Development (UPSIDE): a pregnancy cohort study on prenatal exposure mechanisms for child health
Source: PubMed Central journal article supplement — BMJ Open. 2021 Apr 1;11(4):e044798. doi: 10.1136/bmjopen-2020-044798 (PMC8021752; doi:10.1136/bmjopen-2020-044798), 2021-04-01
Supplement: bmjopen-2020-044798.draft_revisions.pdf [file bmjopen-2020-044798.draft_revisions.pdf]

# BMJ Open

BMJ Open is committed to open peer review. As part of this commitment we make the peer review history of every article we publish publicly available.

When an article is published we post the peer reviewers' comments and the authors' responses online. We also post the versions of the paper that were used during peer review. These are the versions that the peer review comments apply to.

The versions of the paper that follow are the versions that were submitted during the peer review process. They are not the versions of record or the final published versions. They should not be cited or distributed as the published version of this manuscript.

BMJ Open is an open access journal and the full, final, typeset and author-corrected version of record of the manuscript is available on our site with no access controls, subscription charges or pay-per-view fees (<http://bmjopen.bmj.com>).

If you have any questions on BMJ Open's open peer review process please email [info.bmjopen@bmj.com](mailto:info.bmjopen@bmj.com)

# BMJ Open

## Cohort profile: Understanding Pregnancy Signals and Infant Development (UPSIDE), a pregnancy cohort study on prenatal exposure mechanisms for child health

|                               |                                                                                                                                                                                                                                                                                                                                                                                                                                                                                                                                                                                                                                                                                                                                                                                                                                                                                                                                                                                                                                                                                                                      |
|-------------------------------|----------------------------------------------------------------------------------------------------------------------------------------------------------------------------------------------------------------------------------------------------------------------------------------------------------------------------------------------------------------------------------------------------------------------------------------------------------------------------------------------------------------------------------------------------------------------------------------------------------------------------------------------------------------------------------------------------------------------------------------------------------------------------------------------------------------------------------------------------------------------------------------------------------------------------------------------------------------------------------------------------------------------------------------------------------------------------------------------------------------------|
| Journal:                      | <i>BMJ Open</i>                                                                                                                                                                                                                                                                                                                                                                                                                                                                                                                                                                                                                                                                                                                                                                                                                                                                                                                                                                                                                                                                                                      |
| Manuscript ID                 | bmjopen-2020-044798                                                                                                                                                                                                                                                                                                                                                                                                                                                                                                                                                                                                                                                                                                                                                                                                                                                                                                                                                                                                                                                                                                  |
| Article Type:                 | Cohort profile                                                                                                                                                                                                                                                                                                                                                                                                                                                                                                                                                                                                                                                                                                                                                                                                                                                                                                                                                                                                                                                                                                       |
| Date Submitted by the Author: | 14-Sep-2020                                                                                                                                                                                                                                                                                                                                                                                                                                                                                                                                                                                                                                                                                                                                                                                                                                                                                                                                                                                                                                                                                                          |
| Complete List of Authors:     | o'Connor, Thomas; University of Rochester<br>Best, Meghan; University of Rochester Medical Center<br>Brunner, Jessica; University of Rochester Medical Center<br>Ciesla, Allison; University of Rochester Medical Center<br>Cunning, Allison; University of Rochester Medical Center<br>Kapula, Ntemena; University of Rochester Medical Center<br>Kautz, Amber; University of Rochester Medical Center<br>Khoury, Leena; University of Rochester Medical Center<br>Macomber, Allison; University of Rochester Medical Center<br>Meng, Ying; University of Rochester,<br>Miller, Richard; University of Rochester Medical Center<br>Murphy, Hannah; University of Rochester Medical Center<br>Salafia, Carolyn; Institute for Basic Research in Developmental Disabilities, Placental Modulation Laboratory; Placental Analytics LLC<br>Vallejo Sefair, Ana; University of Rochester Medical Center<br>Serrano, Jishyra; University of Rochester Medical Center<br>Barrett, Emily; Rutgers University, Department of Biostatistics and Epidemiology; School of Public Health; University of Rochester Medical Center |
| Keywords:                     | EPIDEMIOLOGY, OBSTETRICS, PAEDIATRICS, PUBLIC HEALTH                                                                                                                                                                                                                                                                                                                                                                                                                                                                                                                                                                                                                                                                                                                                                                                                                                                                                                                                                                                                                                                                 |
|                               |                                                                                                                                                                                                                                                                                                                                                                                                                                                                                                                                                                                                                                                                                                                                                                                                                                                                                                                                                                                                                                                                                                                      |

SCHOLARONE™  
Manuscripts

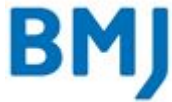

I, the Submitting Author has the right to grant and does grant on behalf of all authors of the Work (as defined in the below author licence), an exclusive licence and/or a non-exclusive licence for contributions from authors who are: i) UK Crown employees; ii) where BMJ has agreed a CC-BY licence shall apply, and/or iii) in accordance with the terms applicable for US Federal Government officers or employees acting as part of their official duties; on a worldwide, perpetual, irrevocable, royalty-free basis to BMJ Publishing Group Ltd ("BMJ") its licensees and where the relevant Journal is co-owned by BMJ to the co-owners of the Journal, to publish the Work in this journal and any other BMJ products and to exploit all rights, as set out in our [licence](#).

The Submitting Author accepts and understands that any supply made under these terms is made by BMJ to the Submitting Author unless you are acting as an employee on behalf of your employer or a postgraduate student of an affiliated institution which is paying any applicable article publishing charge ("APC") for Open Access articles. Where the Submitting Author wishes to make the Work available on an Open Access basis (and intends to pay the relevant APC), the terms of reuse of such Open Access shall be governed by a Creative Commons licence – details of these licences and which [Creative Commons](#) licence will apply to this Work are set out in our licence referred to above.

Other than as permitted in any relevant BMJ Author's Self Archiving Policies, I confirm this Work has not been accepted for publication elsewhere, is not being considered for publication elsewhere and does not duplicate material already published. I confirm all authors consent to publication of this Work and authorise the granting of this licence.

1  
2  
3  
4 **Cohort profile: Understanding Pregnancy Signals and Infant Development**  
5 **(UPSIDE), a pregnancy cohort study on prenatal exposure mechanisms for child health**  
6  
7

8  
9 **Authors:** Thomas G. O'Connor, PhD<sup>1,2,3,4,8</sup>, Meghan Best, MPH<sup>4</sup>, Jessica Brunner<sup>1,4,6</sup>, Allison  
10 Avrich Ciesla, MS<sup>5</sup>, Allison Cunning, MA<sup>4</sup>, Ntemena Kapula<sup>4,6</sup>, Amber Kautz, MS, RDN<sup>5</sup>, Leena  
11 Khoury<sup>1,4</sup>, Allison Macomber<sup>4</sup>, Ying Meng, PhD, RN<sup>6</sup>; Richard K. Miller, PhD<sup>4</sup>; Hannah R.  
12 Murphy<sup>4</sup>; Carolyn Salafia, MD<sup>7</sup>; Ana Vallejo Sefair, MA<sup>8</sup>; Jishyra Serrano<sup>4</sup>, Emily S. Barrett,  
13 PhD<sup>4,5,9,10\*</sup>  
14  
15  
16  
17  
18  
19

20  
21  
22 1 Department of Psychiatry, University of Rochester School of Medicine and Dentistry,  
23 Rochester, NY, USA

24  
25  
26 2 Department of Neuroscience, University of Rochester School of Medicine and Dentistry,  
27 Rochester, NY, USA

28  
29  
30 3 Wynne Center for Family Research, University of Rochester School of Medicine and Dentistry,  
31 Rochester, NY, USA

32  
33  
34 4 Department of Obstetrics and Gynecology, University of Rochester School of Medicine and  
35 Dentistry, Rochester, NY, USA

36  
37  
38 5 Department of Public Health Sciences, University of Rochester School of Medicine and  
39 Dentistry, Rochester, NY, USA

40  
41  
42 6 University of Rochester School of Nursing, Rochester, NY, USA

43  
44  
45 7 Placental Analytics, Larchmont, USA

46  
47  
48 8 Department of Psychology, University of Rochester, Rochester, NY, USA

49  
50  
51 9 Department of Biostatistics and Epidemiology, Rutgers School of Public Health, Piscataway,  
52 NJ, USA

53  
54  
55 10 Environmental and Occupational Health Sciences Institute, Piscataway, NJ, USA  
56  
57

**\*Corresponding author:**

Emily S. Barrett, PhD

Rutgers School of Public Health

Environmental and Occupational Health Sciences Institute

170 Frelinghuysen Rd

Piscataway, NJ 08854

Telephone: 848-445-0197

e-mail: [Emily.barrett@eohsi.rutgers.edu](mailto:Emily.barrett@eohsi.rutgers.edu)

**ABSTRACT**

**Purpose:** Extensive research suggests that maternal prenatal stress and anxiety are reliably related to perinatal and child health outcomes – which may persist into adulthood. However, basic questions remain regarding mechanisms involved. To better understand these mechanisms, we developed the Understanding Pregnancy Signals and Infant Development (UPSIDE) cohort study, which has several distinguishing features, including repeated assessments across trimesters, analysis of multiple biological pathways of interest, and incorporation of placental structure and function as mediators of child health outcomes.

**Participants:** Healthy pregnant women were recruited at <14 weeks gestation. Study visits occurred in each trimester and included extensive psychological, socio-demographic, health behavior, and biospecimen collection. Placenta and cord blood were collected at birth. Children visits (ongoing) occur at birth and 1, 6, 12, 24, 36, and 48 months of age and use standardized anthropometric, clinical, behavioral, biological, and neuroimaging methods.

**Findings to date:** We recruited 326 pregnancies; 294 (90%) were retained through birth. Success rates for prenatal biospecimen collection were high across all trimesters (96-99% for

1  
2  
3 blood, 94-97% for urine, 96-99% for saliva, 96% of placentas, 88% for cord blood, and 93% for  
4 buccal swab). Ninety-four percent of eligible babies (n=277) participated in a birth exam;  
5  
6 postnatal visits are ongoing.  
7  
8  
9

10  
11 **Future plans:** The current phase of the study will follow children through age 48 months to  
12 examine child neurodevelopment and physical development. In addition, the cohort participates  
13 in the National Institutes of Health's Environmental influences on Child Health Outcomes  
14 (ECHO) program, a national study of 50,000 families examining early environmental influences  
15 on perinatal outcomes, neurodevelopment, obesity, and airway disease. Future research will  
16 leverage the rich repository of biological samples and clinical data to expand research on the  
17 mechanisms of child health outcomes in relation to environmental chemical exposures,  
18 genetics, and the microbiome.  
19  
20  
21  
22  
23  
24  
25  
26  
27  
28  
29

### 30 **Strengths and Limitations:**

- 31  
32 • The UPSIDE cohort features intensive, serial biospecimen and questionnaire collection  
33 from the first trimester of pregnancy through age 4 that will allow us to test hypotheses  
34 regarding the pathways by which psychosocial stress impacts children's development  
35 during critical and sensitive periods.  
36  
37
- 38 • Our comprehensive assessment of the placenta, including both morphometric and  
39 molecular markers, provides novel data on the role that this under-studied organ plays  
40 as a mediator of the association between maternal exposures and child outcomes.  
41  
42
- 43 • The study is underpowered to assess clinical outcomes as by design, we recruited a  
44 medically low-risk cohort.  
45  
46  
47  
48  
49  
50  
51  
52  
53  
54  
55  
56  
57

## INTRODUCTION:

For several decades, epidemiological studies have provided robust evidence of an association between maternal prenatal stress or anxiety and child health outcomes<sup>1-6</sup>. The large and growing collection of studies that has emerged from both high-income and low/middle-income countries, suggests that prenatal maternal anxiety or stress is a plausible illustration of a “developmental programming effect” on child health outcomes<sup>7-12</sup>. The developmental programming model proposes that *in utero* exposures instigate an adaptive response in the fetus/child that is carried forward in development and has persisting effects on behavior and biology<sup>13-19</sup>. Central to this hypothesis is the concept that early exposures have a privileged – or different – effect on biological systems than those occurring later in development. The resulting clinical and public health implications of this model are substantial because they suggest that the timing of intervention may be as important as its content. The aim of this paper is to introduce a new cohort, Understanding Pregnancy Signals and Infant Development (UPSIDE), which includes several measurement and design advantages to advance our understanding of maternal prenatal psychosocial stress and child health outcomes.

A key exposure variable in this large collection of studies may be broadly interpreted as prenatal maternal psychological distress. Assessment of maternal psychological distress can derive from many sources, including clinical interviews as well as maternal self-report inventories of anxiety, depressive symptoms, trauma, major life-event stressors, and “pregnancy-specific” worry. The persistence of reported impacts of maternal psychological distress on child outcomes, despite variation in exposure measurement, suggests that the association is robust<sup>20-25</sup>. The corollary – how maternal experience of or exposure to distress creates an exposure variable for the fetus – is far less clear and likely involves multiple, interdependent biological pathways. That is, if stress is indeed a causal factor, it may operate via neuroendocrine, immune, autonomic, or other

1  
2  
3 physiological mechanisms<sup>26-29</sup>. Initial research on the mediating mechanisms, based on strong  
4 evidence from experimental animal studies, targeted the hypothalamic-pituitary-adrenal (HPA)  
5 axis<sup>30</sup>. The biological case for its involvement in the stress response (most typically in the form  
6 of cortisol, the downstream product of HPA activation) is certain, its transplacental transfer is  
7 well-established, and the application to placental mechanisms is evident (placental enzyme 11-  
8  $\beta$ -HSD2)<sup>31 32</sup>. Nonetheless, that biological model is too limited. Human studies have not  
9 provided consistent evidence that prenatal maternal anxiety or stress impacts child development  
10 through HPA-related mechanisms<sup>30 33-37</sup>. Moreover, several lines of research raise alternative  
11 mechanisms. One of the most important of these is maternal inflammation, represented by  
12 research on the Maternal Immune Activation (MIA) model. Research findings show that  
13 circulating proinflammatory markers in pregnancy predict an increased risk of significant  
14 neurodevelopmental problems in the child<sup>38-43</sup>. Other studies indicate that prenatal sex steroids  
15 may also be a plausible predictor of child development<sup>44</sup> and may be confounded with stress  
16 and stress physiology<sup>45-48</sup>. Accordingly, a first major methodological and conceptual strength of  
17 this study is the assessment of biomarkers relevant to alternative pathways (e.g. cytokine  
18 profiles, steroidogenic activity) across pregnancy and in multiple biological sample types (e.g.  
19 maternal blood, cord blood, placenta).

20  
21  
22  
23  
24  
25  
26  
27  
28  
29  
30  
31  
32  
33  
34  
35  
36  
37  
38  
39  
40  
41 A second key feature of the UPSIDE study is its focus on and intensive assessment of the  
42 maternal-fetal-placenta unit. Despite the placenta's critical role in transmitting maternal signals  
43 to the developing fetus, direct measurement of the placenta has been notably absent from the  
44 vast majority of studies on prenatal stress and child development<sup>49 50</sup>. There are both practical  
45 and scientific reasons for the limited research that integrates interrogation of the placenta in  
46 studies of prenatal exposures and child outcomes. The practical matter concerns sample  
47 collection and processing, particularly the 24/7 coverage that this requires if spontaneous  
48 deliveries are included. Scientifically, there is variability among studies in which placental



1  
2  
3 markers are assessed; placenta weight, gene expression, and epigenetics have all received  
4 some attention, almost always in separate reports. In this cohort study, we expand direct,  
5 comprehensive measurement of the placenta to advance the field in several important ways.  
6  
7 First, it is increasingly clear that the placenta contributes to maternal perinatal health <sup>51-53</sup>, with  
8 clear implications for neonatal and, by extension, child health. It is also becoming more widely  
9 appreciated that prenatal exposures (including maternal anxiety or stress but also  
10 environmental exposures) may alter placenta structure and function <sup>54-56</sup>. Finally, there is now a  
11 growing evidence base linking placenta measures to child outcomes such as obesity and  
12 neurodevelopment <sup>57-59</sup>. What has been missing from this field are prospective pregnancy cohort  
13 studies that track mother-child dyads from early gestation through early childhood, while also  
14 collecting detailed placenta data. To that end, the UPSIDE study includes extensive  
15 measurement of placenta structure and function from imaging, histology, and  
16 immunohistochemistry, genetics, and pathology reports.  
17  
18  
19  
20  
21  
22  
23  
24  
25  
26  
27  
28  
29  
30  
31

32 In addition to these conceptual advances, UPSIDE includes several key design elements that  
33 will inform our study of the multiple physiological pathways by which maternal psychological  
34 stress may impact child development. These include: (1) serial maternal questionnaire and  
35 biomarker data across all trimesters to examine critical and sensitive windows of gestation; (2)  
36 pediatric visits at seven time points from birth to 4 years of age to assess neurodevelopment as  
37 well as growth, reproductive development, and HPA axis activity; (3) consideration of potentially  
38 important covariates and confounders that are sometimes overlooked in studies of child  
39 development (e.g. maternal and child diet, physical activity, sleep).  
40  
41  
42  
43  
44  
45  
46  
47  
48  
49  
50

## 51 **COHORT DESCRIPTION:**

52  
53  
54  
55  
56  
57  
58  
59  
60

1  
2  
3 **Study setting and recruitment:** From December 2015–April 2019, women were recruited  
4 during their first trimester of pregnancy from outpatient obstetric clinics affiliated with the  
5 University of Rochester. Eligibility criteria included: <14 weeks gestation, age 18 or older,  
6 singleton pregnancy, no known substance abuse problems or a history of psychotic illness, and  
7 ability to communicate in English. Women with major endocrine disorders (such as polycystic  
8 ovary syndrome), high-risk pregnancies, or significant obstetric problems were excluded. Infants  
9 born prior to 37 weeks gestation were not included in postnatal study phases. Women who were  
10 recruited and delivered and then had a subsequent pregnancy during this time period were also  
11 invited to participate for the second pregnancy, towards the goal of examining intra-individual  
12 differences in prenatal maternal and placental biology as a future research direction. The study  
13 protocol was approved by the University of Rochester School of Medicine and Dentistry (URMC)  
14 Internal Review Board and Rutgers University. All participants provided informed consent.  
15  
16  
17  
18  
19  
20  
21  
22  
23  
24  
25  
26  
27  
28  
29

30 **Patient and public involvement:** No patient involvement.  
31  
32  
33  
34

35 **Overview of UPSIDE study activities:** Prenatal participation in UPSIDE consisted of face-to-  
36 face visits in each trimester, including biospecimen collection and questionnaires. At birth, the  
37 placenta and cord blood were collected, and the infant underwent a neonatal physical exam  
38 prior to hospital discharge. Additional postnatal visits occur when children are 1, 6, 12, 24, 36,  
39 and 48 months of age and biospecimen collection as well as observational and performance-  
40 based assessments of the child; parents complete questionnaires on child and family health and  
41 exposures. In general, data collection for UPSIDE followed several key principles: (1) repeated  
42 measures over time; (2) complementary biospecimen and questionnaire data collection; (3)  
43 ability to test multiple/competing hypotheses. Study activities and biospecimen collections are  
44 summarized in Tables 3 and 4, respectively, and described in greater detail below.  
45  
46  
47  
48  
49  
50  
51  
52  
53  
54  
55  
56  
57  
58  
59  
60

1  
2  
3 **Maternal constructs and measures:** At baseline, participants provided sociodemographic  
4 information; time-sensitive data (e.g. employment, marital status) were updated at each study  
5 visit. Additional measures relevant to psychosocial stress, biological pathways of interest, and  
6 child neurodevelopment were collected during pregnancy as described below. To assess  
7 possible timing effects of exposures as well as changes in maternal mental health across  
8 pregnancy, assessments were repeated in each trimester and, when applicable, at postnatal  
9 visits.  
10  
11  
12  
13  
14  
15  
16  
17  
18

19 **Maternal psychosocial measures.** Anxiety was measured using the Penn State Worry  
20 Questionnaire (PSWQ)<sup>60</sup>. This 16-item self-report instrument targets symptoms of worry (e.g.,  
21 “my worries overwhelm me”) and has been successfully used with this population in our  
22 previous work<sup>61</sup> and others’<sup>62</sup>. Anxiety related specifically to pregnancy was measured using a  
23 7-item scale (adapted from Huizink et al.) that assesses specific worry about the health of the  
24 developing fetus and the birth process<sup>3</sup>. We included alternative measures of maternal mental  
25 health to examine the extent to which detected effects are specific to prenatal maternal anxiety.  
26 The 10-item Edinburgh Postnatal Depression Scale (EPDS) was administered in each trimester  
27 to assess symptoms of depression<sup>63</sup>. Domestic abuse and violence were assessed using a 5-  
28 item screener inquiring about events occurring in the past year and lifetime based on previously  
29 used tools<sup>64 65</sup>. To facilitate comparison with other study populations and assess global stress,  
30 the 14-item Perceived Stress Scale (PSS) was administered at all visits (prenatal and  
31 postnatal)<sup>66</sup>. In the 3<sup>rd</sup> trimester, mothers reported stressful life events occurring across  
32 pregnancy on a 26-item scale derived from that used in previous studies<sup>20 67</sup>. To assess  
33 potentially traumatic experiences occurring in childhood (age 0-17) that may impact adult health  
34 and well-being, the 10-item Adverse Childhood Experiences (ACEs) scale was administered in  
35 the third trimester<sup>68</sup>. Maternal discrimination was assessed using the Experiences of  
36 Discrimination (EOD) scale which includes Response to Unfair Treatment, Discrimination, and  
37  
38  
39  
40  
41  
42  
43  
44  
45  
46  
47  
48  
49  
50  
51  
52  
53  
54  
55  
56  
57  
58  
59  
60

1  
2  
3 Everyday Discrimination scales based on race and ethnicity only<sup>69</sup>. Maternal aggression was  
4 measured through the 29-item Buss Perry Aggression Scale which includes subscales for  
5 Anger, Hostility, Physical Aggression, and Verbal Aggression<sup>70</sup>. To evaluate neighborhood  
6 stressors, participants completed the City Stress Inventory, an 18-item scale focusing on  
7 neighborhood disorder and exposure to violence<sup>71</sup>. Social support was measured using a  
8 modified 30-item version of the Interpersonal Support Evaluation List (ISEL)<sup>72</sup>. Finally, we  
9 administered the Couples Satisfaction Index, a 4-item measure of relationship satisfaction<sup>73</sup>.

10  
11  
12  
13  
14  
15  
16  
17  
18  
19 **Maternal health behaviors and other covariates.** To complement the extensive maternal  
20 psychosocial assessments described above, mothers completed additional measures related to  
21 psychosocial stress and/or child neurodevelopment. **Physical Activity.** The Pregnancy Physical  
22 Activity Questionnaire (PPAQ), which assesses household/caregiving, occupational,  
23 sports/exercise, sedentary, light, moderate, and vigorous activities, was administered in order to  
24 estimate average weekly energy expenditure<sup>74</sup>. **Sleep.** The Pittsburgh Sleep Quality Index  
25 (PSQI), a 19-item questionnaire, assesses sleep disturbances and sleep quality over a 1-month  
26 time period<sup>75</sup>. **Diet.** Two 24-hour dietary recalls were collected during mid- to late pregnancy to  
27 assess nutrient intake. Participants were interviewed by a trained nutrition coordinator using the  
28 Automated Multiple-Pass Method developed by the United States Department of Agriculture<sup>76</sup>.  
29 The resulting data are analyzed using the Nutrition Data System for Research software (NDSR,  
30 2017 version, University of Minnesota Nutrition Coordinating Center, Minneapolis, MN)<sup>77</sup>. The  
31 National Cancer Institute method is then applied to estimate usual food and nutrient intake<sup>78</sup>.  
32  
33  
34  
35  
36  
37  
38  
39  
40  
41  
42  
43  
44  
45  
46  
47 **Cognition.** To assess maternal cognition, participants completed a mental rotation task, the 24-  
48 item Vandenberg-Kuse test<sup>79</sup>, during the third trimester of pregnancy. Additionally, mothers  
49 complete an abbreviated Verbal Comprehension subtest of the Wechsler Adult Intelligence  
50 Scale IV (WAIS-IV)<sup>80</sup>, at one time point during the postnatal period.  
51  
52  
53  
54  
55  
56  
57  
58  
59  
60

1  
2  
3 **Prenatal maternal biospecimen collection and analysis.** UPSIDE collects extensive  
4 maternal biospecimens as described below and in Table 4. In addition to the specific analyses  
5 described, for all sample types, additional aliquots are banked for future research. **Blood.** In  
6 each trimester, a 40mL blood sample was collected and processed to provide aliquots of serum,  
7 plasma, cells, and whole blood (3<sup>rd</sup> trimester only) for a variety of analyses. Ongoing analysis of  
8 these samples includes (1) sex steroid hormones (estrone, estradiol, estriol, testosterone, and  
9 free testosterone) using liquid chromatography with tandem mass spectrometry (LC-MS/MS)<sup>81</sup>;  
10 (2) placental corticotropin releasing hormone using radioimmunoassay<sup>82</sup>; (3) immune and  
11 related markers [e.g. high sensitivity cytokines, C-reactive protein (CRP), TGF-beta, angiogenic  
12 markers, and Mullerian inhibiting factor (MIF)]. Maternal blood was collected by labor and  
13 delivery nursing staff upon admission for delivery for additional assessment of immune markers.  
14 **Saliva.** Participants were trained to collect diurnal saliva for cortisol measurement using the  
15 standard passive drool procedures developed by the MacArthur Research Network on  
16 Socioeconomic Status and Health<sup>83</sup>. Samples (approximately 1 mL) were collected at home at  
17 five pre-determined points across the day (at wake-up, 45 minutes after wake-up, 2.5 hours  
18 after wake-up, 8 hours after wake-up, 12 hours after wake-up) on a single day in each trimester  
19 (for a total of 5 samples per trimester or 15 samples across the pregnancy). An additional  
20 passive drool saliva sample was collected by mothers at face-to-face visits and will be used to  
21 assess the oral microbiome. **Urine.** At each prenatal visit, a urine sample was collected, after  
22 which the specific gravity (dilution) and temperature of the sample were measured using a  
23 handheld refractometer (National Instrument Company, Inc., USA). Five mL are frozen for future  
24 use. **Buccal swab.** In the third trimester, a buccal cell sample for DNA analysis was collected by  
25 swabbing the inside of the participant's cheek (MAWI iSWAB, 250 series) after which samples  
26 were stored according to manufacturer guidelines. **Vaginal swab.** In the third trimester, when a  
27 vaginal swab is taken by the provider to test for the presence of Streptococcus B as part of

1  
2  
3 standard obstetric care, an additional swab was collected for future analysis of the vaginal  
4 microbiome.  
5  
6  
7

8  
9 **Birth biospecimen collection and analysis.** Samples were collected at the time of delivery  
10 (usually within 1 hour) and banked at -80°C. Analyses including hormone and immune assays,  
11 environmental chemical assessments, and genetics are ongoing.  
12  
13  
14

15  
16 **Cord bloods.** Cord bloods were collected in two venues: (1) mixed cord bloods (up to 25mL)  
17 from the delivery room by delivery staff; and (2) fetal arterial and venous bloods (up to 30mL  
18 each) drawn from the placental vasculature by trained coordinators immediately following  
19 delivery. The bloods collected from the cord, umbilical vein, and umbilical artery were placed  
20 into additive free tubes, K2-EDTA tubes, and sodium heparin tubes, depending on the volume  
21 collected. Peripheral blood mononuclear cells (PBMCs) extracted using Ficoll-Paque and red  
22 blood cells (RBCs) reserved from processing cord bloods were stored in liquid nitrogen.  
23  
24  
25  
26  
27  
28  
29  
30  
31  
32  
33

34  
35 **Placental tissue collection.** Fresh core villous tissue was collected by a trained coordinator  
36 using a flap technique to leave the maternal decidua surface intact. For RNA analysis, two  
37 50mg tissue sections were washed in phosphate buffered saline, placed in cryovials, and flash  
38 frozen in liquid nitrogen. About 30g of additional placental tissue was extracted using the same  
39 technique and frozen unwashed in liquid nitrogen for other types of analyses.  
40  
41  
42  
43  
44  
45  
46

47  
48 **Placental pathology.** All placentae underwent a detailed pathology examination that included  
49 standard gross and histologic protocols as well as novel assessment of placental  
50 vascularization patterns on the chorionic plate. Using a standard digital camera with polarizing  
51 filters, a trained coordinator took a series of 2D photographs of the fresh tissue prior to core  
52 villous specimen sampling. From the 2D photographs, fetal vascular data will be extracted,  
53  
54  
55  
56  
57

1  
2  
3 arterial and venous surface vascular networks mapped, and virtual slices created. Chorionic  
4 surface vasculature branching will be further analyzed using computer extraction techniques,  
5 yielding continuous measures including number of branch generations, number of branches off  
6 base of cord, number of branch points in network, and mean distance from end of artery to end  
7 of nearest vein.  
8  
9  
10  
11  
12

13  
14  
15 Additional photos were taken after removal of the placental specimens to indicate locations of  
16 the collections. Weight was collected after removal of the cord and membranes using a  
17 standard scale, and cord length was measured (to the nearest 0.1cm) using a tape measure.  
18  
19 Cord twists were counted to measure the twist index. Biopsies of the cord were taken at the  
20 insertion site and 10cm from the insertion site, then placed in cassettes. A section of membrane  
21 was cut into a square and rolled, then placed in a cassette. Placentae were reviewed by a  
22 pathologist to assess for histology, anomalies, and infections. All tissues were placed into  
23 formalin for fixation for at least 72 hours. After fixation, the placentae were sectioned and  
24 images were obtained of each section. Biopsies of tissue from four quadrants, plus any  
25 additional abnormal tissues that were noted, were collected into cassettes for further analysis.  
26  
27 The remaining tissues were retained for future assessments.  
28  
29  
30  
31  
32  
33  
34  
35  
36  
37  
38  
39  
40

41 **3D placental imaging.** Three dimensional digital scans of all placentae were collected to  
42 assess placental morphology. The custom-built scanner contains two webcams mounted on a  
43 bar providing binocular view, and a turntable on which the placenta is placed. The scanner took  
44 8 images of the top and bottom of the placenta and the software assembled these resulting 16  
45 images into a 3-D shape. Morphometric measures to be obtained from 3D images include  
46 estimated volume, surface area, thickness, shape, and symmetric difference.  
47  
48  
49  
50  
51  
52  
53  
54  
55  
56  
57  
58  
59  
60

1  
2  
3 **Prenatal and Birth Record Abstraction.** Clinical data was abstracted from the UPMC eRecord  
4 system. Prenatal record abstraction included medical, surgical, gynecological, and reproductive  
5 history, prenatal visit records, ultrasound measurements, and clinical lab values. Delivery chart  
6 abstraction included admission date and time, gestational age on admission, labor onset and  
7 duration, rupture of membranes, highest intrapartum temperature, group B streptococcus status,  
8 maternal white blood cells, delivery date and time, fetal position and mode of delivery,  
9 complications, medications, and maternal morbidity. In addition, relevant data from newborn  
10 nursery records were abstracted including birth weight and length, head circumference, APGAR  
11 scores, admission unit for baby, first recorded temperature, first recorded blood glucose, Kaiser  
12 sepsis risk score, cord arterial pH, neonatal resuscitation, and neonatal complications.  
13  
14  
15  
16  
17  
18  
19  
20  
21  
22  
23  
24  
25

26 **Child study activities.** Child visits occur at birth as well as 1, 6, 12, 24, 36, and 48 months of  
27 age. Consistent with the study emphasis on longitudinal measures over time, many  
28 assessments are repeated at multiple time points, as age appropriate. At present, all birth and 1  
29 month visits have been completed, whereas 6, 12, 24, and 36 month visits are ongoing, and 48  
30 month visits will start in late 2020. Here we provide an overview of the child data collected  
31 across all of these timepoints by domain of interest.  
32  
33  
34  
35  
36  
37  
38  
39  
40

41 **Neurodevelopment.** UPSIDE study children participate in an extensive battery of  
42 neurodevelopmental assessments (Table 3). Some of these assessments (e.g. Bayley Scales of  
43 Infant Development-III) have been widely used in hundreds of pediatric studies and provide  
44 global measures of development, whereas others are more targeted, selected based on  
45 previous work linking them to prenatal stress, inflammation, or sex steroid exposure. All  
46 assessments are based on direct observation (as opposed to maternal report), unless otherwise  
47 noted.  
48  
49  
50  
51  
52  
53  
54  
55  
56  
57  
58  
59  
60



1  
2  
3 Cognition and language. The Bayley Scales of Infant Development-III (BSID-III), a widely used  
4 tool for assessing mental and motor development in infants and toddlers, is administered at 6,  
5 12, and 24 months<sup>84</sup>. Of primary interest are the Cognitive scaled-score and the Language  
6 scaled-score, including both receptive and expressive communication subtests which assess  
7 memory, sensorimotor development, preverbal behaviors and communication and vocabulary  
8 development. At 24 months, complementary data on early vocabulary are obtained through the  
9 MacArthur-Bates Communicative Development Inventory: Words and Gestures which asks  
10 parents to mark on a checklist which phrases, words, and sound effects their child understands,  
11 says, or signs <sup>85</sup>. Executive Function is assessed at 24 and 36 months using age-appropriate  
12 standardized tasks that evaluate the child's working memory ("Spin the Pots"), impulse control  
13 ("Snack Delay"), and inhibitory control ("Reverse Categorization")<sup>86-88</sup>. At 36 and 48 months we  
14 administer additional tasks from the NIH ToolBox Early Childhood Cognition Battery including:  
15 Flanker Inhibitory Control and Attention Test (executive function and attention), Dimensional  
16 Change Card Sort Test (cognitive flexibility), Picture Sequence Memory (episodic memory), and  
17 Picture Vocabulary Test (language development)<sup>89-92</sup>. Finally, at age 4 years, the Wechsler  
18 Preschool and Primary Scale of Intelligence (WPPSI-IV) is administered to facilitate calculation  
19 of verbal, performance and full scale IQ <sup>93</sup>.

20  
21  
22  
23  
24  
25  
26  
27  
28  
29  
30  
31  
32  
33  
34  
35  
36  
37  
38  
39  
40 Temperament and behavior. The Laboratory Temperament Assessment Battery (Lab-TAB) is  
41 an observational tool for examining multiple dimensions of infant temperament <sup>94</sup>. We administer  
42 Lab-TAB fear tasks involving the presentation of an unpredictable mechanical toy (6, 12, and 24  
43 months) and a remote-controlled spider (12 and 24 months). In the Anger/Frustration task (6  
44 and 12 months), the infant is allowed to engage with a novel toy and is subsequently interrupted  
45 by gentle arm restraint. At 6, 12, and 24 months, mothers complete the Infant Behavior  
46 Questionnaire – revised (IBQ-R), a 191-item questionnaire on infant temperament that assesses  
47 14 different dimensions (Approach, Vocal Reactivity, High Intensity Pleasure, Smile and  
48  
49  
50  
51  
52  
53  
54  
55  
56  
57

1  
2  
3 Laughter, Activity Level, Perceptual Sensitivity, Sadness, Distress to Limitations, Fear, Falling  
4  
5 Reactivity, Low Intensity Pleasure, Cuddliness, Duration of Orienting, Soothability, Social Fear,  
6  
7 Attentional Shifting)<sup>95</sup>. At 12 months we also administer the Strange Situation Procedure, widely  
8  
9 used to assess parent-infant attachment relationships<sup>96 97</sup>.

11  
12  
13 Sexually dimorphic neurodevelopment. We administer a series of specialized tasks that, in  
14  
15 previous research, have demonstrated sex differences even in early infancy. At 1 and 6 months,  
16  
17 infants engage in a task assessing preferences for faces<sup>98</sup>. At 6, 12, and 24 months, children  
18  
19 complete a series of computer-based tasks assessing preferences for sex-stereotypical toys  
20  
21 (e.g. doll versus toy truck) and social stimuli<sup>99 100</sup>. A computerized mental rotation task  
22  
23 developed for use in infants is administered at 6, 12, 24, and 36 months<sup>101</sup>. Finally at 12 and 24  
24  
25 months, the child engages in an independent play task designed to assess preferences for  
26  
27 stereotypically female, male, and gender neutral toys<sup>102</sup>.

28  
29  
30  
31  
32 Eating behaviors. Eating behaviors are assessed using multiple questionnaires and  
33  
34 observational tasks at the child's 36-month visit. The Children's Eating Behavior Questionnaire,  
35  
36 Preschool Adapted Liking Survey, and Comprehensive Feeding Practices Questionnaire are  
37  
38 completed by the parent to indicate the child's eating behaviors and parental influences, such as  
39  
40 food responsiveness, emotional overeating, food preference, food restriction, and family food  
41  
42 environment<sup>103-105</sup>. Food reinforcement is an observational task used to examine the reinforcing  
43  
44 value of food in children, which indicates motivation to eat<sup>106</sup>. A food ranking task was  
45  
46 developed to evaluate the child's ability to indicate his/her food preference by ranking pictures of  
47  
48 food items. To complement the eating behavior tasks and provide information on the child's  
49  
50 usual dietary intake, at the 36-month visit, the parent completes 24-hour dietary recalls for the  
51  
52 child (similar to the one completed by mothers during pregnancy).

1  
2  
3 Neuroimaging. At 1 month of age, magnetic resonance imaging (MRI) is collected on a Siemens  
4 Prisma with a 32 channel head coil using a standard protocol that assesses anatomical scans,  
5 Diffusion Tensor Imaging, and Resting State Functional Connectivity. MRI is conducted while  
6 the infant is in a natural sleep. An second MRI will be performed at age 4. When the child is 24  
7 and 36 months, a electroencephalogram (EEG) assessment is conducted. In the EEG, select  
8 stimuli are presented and the brain's measured response, known as event-related potentials  
9 (ERP), is recorded. Our stimulus is an auditory event-related potential, called mismatch  
10 negativity (MMN). In the MMN assessment, repetitive sounds are interrupted by an occasional  
11 odd sound, that differs in frequency and duration.  
12  
13  
14  
15  
16  
17  
18  
19  
20  
21  
22  
23

24 **Anthropometry.** At each visit, child anthropometric measurements are collected by trained  
25 research coordinators. In general, measurements are collected in duplicate at each time point,  
26 with a third measurement obtained when the first two differ by more than a pre-specified  
27 amount. Weight, length, and head circumference are measured at every postnatal visit using  
28 standard protocols<sup>107</sup>. Weight (to the nearest 0.01kg) is measured using a Seca Infant Scale  
29 (Model #334). Length (to the nearest 0.1cm) is measured using a Seca Infantometer  
30 (Model#416), tape measure, or wall-mounted stadiometer (depending on age). Head  
31 circumference is measured by placing a tape measure just above eyebrows and wrapping it  
32 around the widest part of the head. Skinfold thicknesses (suprailiac, subscapular, and tricep)  
33 are obtained to the nearest 0.1 mm using calibrated Holtain calipers<sup>107 108</sup>. From birth to 24  
34 months, anogenital distance, a marker of prenatal androgen exposure, is measured to the  
35 nearest 0.1 mm using dial Vernier calipers<sup>109</sup>. A second purported measure of prenatal  
36 androgen exposure, second to fourth digit ratio (2D:4D) of the child's right hand is measured to  
37 the nearest 0.1 mm at 36 and 48 months also using dial Vernier calipers<sup>110</sup>. Finally, at 36 and 48  
38 months, waist circumference is measured to the nearest 0.1 cm by wrapping a tape measure  
39 around the body at the level of the umbilicus<sup>107</sup>.  
40  
41  
42  
43  
44  
45  
46  
47  
48  
49  
50  
51  
52  
53  
54  
55  
56  
57  
58  
59  
60

1  
2  
3  
4  
5 **Child biospecimen collection.** Postnatal biospecimen collection occurs at each child visit  
6  
7 (Table 4). Analysis of immune and HPA axis markers is ongoing, whereas additional analysis of  
8  
9 banked biospecimens is pending. **Rectal swab.** At birth as well as 1, 6, 12, and 24 months, a  
10  
11 sterile swab applicator is dipped into sterile phosphate buffered saline, inserted into the child's  
12  
13 anal orifice up to the floxed portion of the swab, and stored in a conical tube for future  
14  
15 microbiome analyses<sup>111</sup>. **Buccal swab.** At birth, 12, 24, and 48 months, a buccal specimen is  
16  
17 collected for genetic analysis at least 60 minutes after the last recorded feeding. Both cheeks  
18  
19 are swabbed using a Mawi iSWAB collection kit (250 series) and the vial is stored according to  
20  
21 manufacturer guidelines. **Saliva.** At 6, 12, 24, and 48 months, saliva is collected to measure  
22  
23 cortisol using Salimetrics SalivaBio swabs. To assess cortisol response to a stressor (blood  
24  
25 draw at 6 months, strange situation task at 12 months, physical exam at 24 months) a series of  
26  
27 swabs are collected: at the start of the visit (6 and 24 months only), pre-stressor, 15 minutes  
28  
29 post-stressor, and 30 minutes post-stressor. At 24 and 48 months, an additional saliva swab is  
30  
31 collected for assessment of the oral microbiome. **Stool.** At 1 and 6 months, a stool sample is  
32  
33 collected at study visits using standard protocols (or by parents using an at-home collection kit if  
34  
35 sample collection at the visit is not possible). **Urine.** Urine is collected at the 1, 6, and 12 month  
36  
37 visits using an Earth's Best chlorine free diaper equipped with either a urine collection bag  
38  
39 and/or sterile cotton balls. **Blood.** At 6, 12, and 48 months, approximately 10mL of blood is  
40  
41 collected by a pediatric nurse (4 mL in a K2-EDTA tube and 3 mL in each of 2 sodium heparin  
42  
43 tubes at 6 and 12 months, 8mL into a sodium heparin tube, 2mL into a K2-EDTA tube, and 3mL  
44  
45 into a tube without additives at 48 months). **Nails.** At 12, 24, and 36 months, fingernails and  
46  
47 toenails are collected at study visits (or by parents using an at-home collection kit). **Breastmilk.**  
48  
49 Mothers who are breastfeeding at 1 and 6 months provide a breastmilk sample (up to 45mL).  
50  
51 Mothers collect the sample during the visit (when possible) using a new, sterile Harmony  
52  
53  
54  
55  
56  
57  
58  
59  
60

1  
2  
3 Medela manual breast pump. When that is not possible, mothers bring in a breastmilk sample  
4 that was collected at home.  
5  
6  
7

### 8 9 **FINDINGS TO DATE:**

10  
11 In total, 312 women were recruited into the study, of whom 14 enrolled for more than one  
12 pregnancy, resulting in a total of 326 study pregnancies (Table 1; Figure 1). Of these, 294  
13 mothers gave birth to an infant in the study. The 32 women who signed informed consent but  
14 did not give birth to a study infant included 3 screen failures, 5 pregnancy losses, 8 who became  
15 ineligible during pregnancy, 2 who were lost to follow up, and 14 who chose to withdraw. Here  
16 we report on the mothers who gave birth to an infant in the study.  
17  
18  
19  
20  
21  
22  
23  
24  
25

26 On average, women were  $28.9 \pm 4.7$  years old at recruitment and the majority are White (61.2%)  
27 and Black (25.5%), with 9.9% reporting Hispanic ethnicity. The participants are  
28 socioeconomically diverse with a 34.2% having a high school degree or less, while 25.7% had  
29 obtained a post-college degree. At the time of recruitment 74.9% were employed and 60.3%  
30 were married or living as married. Self-reported alcohol use and smoking during pregnancy  
31 were both relatively uncommon (3.4% and 7.8%, respectively).  
32  
33  
34  
35  
36  
37  
38  
39  
40

41 The cohort was mildly psychosocially risk enriched and overall symptoms were stable across  
42 trimesters with ICC's for the various psychosocial scales ranging from 0.68-0.80 (Table 2).  
43

44 There was a small increase in average EPDS scores across pregnancy, however the proportion  
45 of women scoring  $\geq 13$  (the most commonly used cutoff indicating possible depression) was  
46 stable across pregnancy (9.5-10.6% across trimesters). Anxiety (as assessed by the PSWQ)  
47 was similarly stable. At baseline, 36%, 44%, and 14% of women were classified as having low,  
48 moderate, and high levels of worry, and these proportions remained consistent across  
49 pregnancy. Women typically worried less about their fetuses after the first trimester, with slight  
50  
51  
52  
53  
54  
55  
56  
57

1  
2  
3 increases in worry about delivery over time. In the third trimester, 67.9% of women reported at  
4 least one ACE, with 16.7% reporting four or more. Similarly, the average number of stressful life  
5 events during pregnancy was relatively low ( $2.46 \pm 2.80$ ), however there was great inter-  
6 individual variation such that some women reported up to 17 events. By design, this was a low-  
7 medical risk cohort at recruitment therefore relatively few participants had major pregnancy  
8 complications including hypertensive disorders of pregnancy (n=22, 7.5%) and gestational  
9 diabetes (n=6; 2.0%). The average gestational age at birth was 39.5 weeks and only 14 (4.7%)  
10 babies were born preterm.  
11  
12  
13  
14  
15  
16  
17  
18  
19  
20  
21

22 Success rates for biospecimen collection were consistently high across trimesters (blood: 95-  
23 99%; urine 94-97%; saliva 96-100%). In addition, 272 mothers (93%) provided a buccal swab  
24 for DNA analysis and 258 mothers (75%) provided a vaginal swab. At birth, the placenta and  
25 cord blood were obtained in 96% and 88% of women, respectively. Finally, 277 infants (94%)  
26 participated in an exam at birth; of these 271 (98%) provided a buccal swab and a rectal swab  
27 (for microbial analysis) was obtained on 261 (94%). One-month visits were recently completed  
28 with additional postnatal visits at 6, 12, 24, 36, and 48 months underway.  
29  
30  
31  
32  
33  
34  
35  
36  
37  
38

### 39 **STRENGTHS AND LIMITATIONS:**

40  
41 There are several notable strengths of the UPSIDE study. The first is our extensive, rigorous  
42 biospecimen collection starting in the first trimester and continuing throughout pregnancy. This  
43 is made possible by focusing recruitment and prenatal visits primarily at a small set of obstetric  
44 clinics located in close proximity to the labs where processing and storage occurs. Similarly,  
45 birth biospecimen collection (placenta and cord blood) is a strength and based on our  
46 experience, a large “SWAT” team is needed for around the clock collection and processing of  
47 placentae within 3 hours after birth (ideally within 1 hour). The need for a 24/7 dedicated on call  
48 team is further illustrated by the fact that the majority of study births occurred outside of  
49  
50  
51  
52  
53  
54  
55  
56  
57

1  
2  
3 business hours (Figure 2). Similarly, we implemented multiple mechanisms to identify when  
4 study participants were admitted for delivery. The successful strategies discussed above  
5 allowed UPSIDE to acquire 96% of placentae. Our extensive placental assessments and  
6 biorepository will provide exceptionally rich data on both morphology and molecular biology,  
7 allowing us to address novel questions about the placenta in relation to maternal exposures and  
8 child outcomes.  
9  
10  
11  
12  
13  
14  
15

16  
17  
18 Another strength of the study is our intensive longitudinal follow-up of mother-child dyads with a  
19 focus on repeated measures to assess intra-individual changes over time. In the prenatal  
20 period, for example, our extensive phenotyping of mothers occurs at three time points, allowing  
21 us to look at trimester-specific impacts and to potentially differentiate between different domains  
22 of psychosocial stress (e.g. anxiety, depression, stressful life events). During the postnatal  
23 period, we again adopt this model, with seven visits occurring from birth to age 4. This intensive  
24 visit schedule allows us to assess domains of neurodevelopment (as age-appropriate) over time  
25 and facilitates serial collection of relevant biospecimens that may yield mechanistic insights. Our  
26 use of standard measures of development and cognition (such as the WPPSI and BSID-III),  
27 moreover, is complemented by tools developed to examine more specific aspects of  
28 development that are plausibly linked to our pathways of interest (e.g. social preferences and  
29 sex-typical play behavior in relation to sex steroids).  
30  
31  
32  
33  
34  
35  
36  
37  
38  
39  
40  
41  
42  
43  
44

45 At the same time, there are several limitations of note. The deliberate recruitment of low-medical  
46 risk pregnancies means that we are underpowered to test hypotheses regarding pregnancy  
47 complications or outcomes. Similarly, our relatively small sample size and overall healthy  
48 population precludes examining pediatric clinical outcomes such as birth defects, autism  
49 spectrum disorders or developmental delays; however, our ability to look at continuous  
50 measures of development will yield insights into neurodevelopmental variation within the typical  
51  
52  
53  
54  
55  
56  
57



1  
2  
3 spectrum. Finally, given evidence that preterm infants develop along a very different trajectory  
4 than term infants, preterm infants were not included in postnatal follow-up, so we cannot look at  
5 outcomes in this special group.  
6  
7  
8  
9

### 10 11 **COLLABORATION:**

12 Interested investigators may contact the PIs (EB, TO'C) in writing regarding potential  
13 collaborations involving data and/or biospecimens from the UPSIDE study. Potential  
14 collaborators will be asked to write a concept proposal for their proposed analysis which will be  
15 reviewed by the UPSIDE Executive Committee. After concept proposal approval, collaborators  
16 will submit analysis plans and proof of IRB approval to the Executive Committee prior to  
17 receiving data/samples. Requests for collaborations will be considered on an ongoing basis;  
18 however, in general, external collaborations will be started once the primary study aims have  
19 been addressed.  
20  
21  
22  
23  
24  
25  
26  
27  
28  
29  
30

### 31 32 **FUTURE DIRECTIONS:**

33 The rich biospecimen collection and intensive phenotyping of the UPSIDE cohort lends itself to  
34 a wide range of ancillary studies and future directions. At present, ancillary studies to examine  
35 environmental chemicals (synthetic chemicals and metals) and air pollution in relation to  
36 placental function, perinatal outcomes, and infant development are in progress. Also underway  
37 is a complementary study of participating mothers looking at trajectories of cardiometabolic  
38 health from early pregnancy through three years postpartum. Additional studies are planned to  
39 examine the microbiome (vaginal, oral, gut, and breastmilk) in relation to various endpoints  
40 including pediatric oral health and neurodevelopment. As part of the ECHO consortium, data  
41 and biospecimens from our cohort are harmonized with up to 50,000 other participating mother-  
42 child dyads from cohort studies around the U.S. with the goal of providing novel insights into  
43  
44  
45  
46  
47  
48  
49  
50  
51  
52  
53  
54  
55  
56  
57  
58  
59  
60



1  
2  
3 factors that shape multiple facets of children's health (including pre-, peri-, and postnatal  
4 outcomes, upper and lower airway health, obesity, neurodevelopment, and positive health).  
5  
6  
7

8  
9 **Author affiliations.** All authors (with the exception of CS) are affiliated with the University of  
10 Rochester School of Medicine and Dentistry. The senior author (EB) also holds an appointment  
11 at Rutgers School of Public Health. CS's primary affiliation is Placental Analytics.  
12  
13  
14

15  
16  
17 **Collaborators.** UPSIDE study collaborators include: Jennifer Adibi, Lauren Aleksunes, Mary  
18 Caserta, Susan Groth, Philip Katzman, Eva Pressman, Xing Qiu, Zorimar Rivera-Nunez, Kristin  
19 Scheible, Ruchit Shah, Lorelei Thornburg, and Sally Thurston.  
20  
21  
22  
23

24  
25  
26 **Contributors.** We acknowledge the contributions of Jessica Alawi-Dugovic, Sanjukta  
27 Bandyopadhyay, Jennifer Carnahan, Srihari Chari, Jennifer Dutra, Simone Greenberg, Katie  
28 Helbig, Maia Homsy, Zoe Irving, Dan Kaplan, Nate Laniewski, Anne Mientkiewicz, Jessica  
29 Mitchell, Aurora Newman, Lisa Panisch, Ryan Prawel, Jenelle Putzig, Amanda Rubano, Andrew  
30 Shay, Meghan Sheahan, David Skril, Jiatong Sui, Sophia Turbide, Meghana Vulapalli, Bailey  
31 Walters, Gloria Wink, and Zidian Xie. We also acknowledge the mothers and babies who  
32 participate in UPSIDE.  
33  
34  
35  
36  
37  
38  
39  
40  
41  
42

43 **Funding.** Funding for the UPSIDE-ECHO study is provided by NIH grants R01HD083369,  
44 UG3OD023349, UH3OD023349, R01ES029275, R01ES029275-02S1, R01NR01760203,  
45 R01ES029336, K23NR019014, and the Mae Stone Goode Foundation and the Wynne Center  
46 for Family Research. Additional support is provided by P30ES005022, P30ES001247, and  
47 TL1TR000096.  
48  
49  
50  
51  
52

53  
54  
55 **Competing interests.** None declared.  
56  
57

1  
2  
3  
4  
5 **Patient consent for publication.** Not required.  
6  
7  
8

9 **Ethics approval.** This study was approved by the University of Rochester School of Medicine  
10 and Dentistry Institutional Review Board (#58456) and the Rutgers University Institutional  
11 Review Board (PRO20160001514).  
12  
13  
14  
15

16  
17  
18 **Provenance and peer review.** Not commissioned; externally peer reviewed.  
19  
20

21  
22 **Data availability statement.** Once complete cohort data has been collected and cleaned, it will  
23 be available pending approved concept proposal, analysis plan, and documentation of IRB  
24 approval.  
25  
26  
27  
28  
29  
30  
31  
32  
33  
34  
35  
36  
37  
38  
39  
40  
41  
42  
43  
44  
45  
46  
47  
48  
49  
50  
51  
52  
53  
54  
55  
56  
57  
58  
59  
60

## Works cited

1. O'Connor TG, Heron J, Golding J, et al. Maternal antenatal anxiety and children's behavioural/emotional problems at 4 years. Report from the Avon Longitudinal Study of Parents and Children. *Br J Psychiatry* 2002;180:502-8. [published Online First: 2002/06/04]
2. Buss C, Davis EP, Hobel CJ, et al. Maternal pregnancy-specific anxiety is associated with child executive function at 6-9 years age. *Stress* 2011;14(6):665-76. doi: 10.3109/10253890.2011.623250 [published Online First: 2011/10/15]
3. Huizink AC, Robles de Medina PG, Mulder EJ, et al. Stress during pregnancy is associated with developmental outcome in infancy. *J Child Psychol Psychiatry* 2003;44(6):810-8. doi: 10.1111/1469-7610.00166 [published Online First: 2003/09/10]
4. O'Connor TG, Heron J, Glover V. Antenatal anxiety predicts child behavioral/emotional problems independently of postnatal depression. *J Am Acad Child Adolesc Psychiatry* 2002;41(12):1470-7. doi: 10.1097/00004583-200212000-00019 [published Online First: 2002/11/26]
5. Talge NM, Neal C, Glover V. Antenatal maternal stress and long-term effects on child neurodevelopment: how and why? *J Child Psychol Psychiatry* 2007;48(3-4):245-61. doi: 10.1111/j.1469-7610.2006.01714.x [published Online First: 2007/03/16]
6. Welberg LA, Seckl JR. Prenatal stress, glucocorticoids and the programming of the brain. *J Neuroendocrinol* 2001;13(2):113-28. doi: 10.1046/j.1365-2826.2001.00601.x [published Online First: 2001/02/13]
7. Buffa G, Dahan S, Sinclair I, et al. Prenatal stress and child development: A scoping review of research in low- and middle-income countries. *PLoS One* 2018;13(12):e0207235. doi: 10.1371/journal.pone.0207235 [published Online First: 2018/12/29]
8. Ramchandani PG, Richter LM, Norris SA, et al. Maternal prenatal stress and later child behavioral problems in an urban South African setting. *J Am Acad Child Adolesc Psychiatry* 2010;49(3):239-47. [published Online First: 2010/04/23]
9. MacGinty RP, Kariuki SM, Barnett W, et al. Associations of antenatal maternal psychological distress with infant birth and development outcomes: Results from a South African birth cohort. *Compr Psychiatry* 2020;96:152128. doi: 10.1016/j.comppsy.2019.152128 [published Online First: 2019/11/13]
10. Herba CM, Glover V, Ramchandani PG, et al. Maternal depression and mental health in early childhood: an examination of underlying mechanisms in low-income and middle-income countries. *Lancet Psychiatry* 2016;3(10):983-92. doi: 10.1016/s2215-0366(16)30148-1 [published Online First: 2016/09/22]
11. Hentges RF, Graham SA, Plamondon A, et al. A Developmental Cascade from Prenatal Stress to Child Internalizing and Externalizing Problems. *J Pediatr Psychol* 2019;44(9):1057-67. doi: 10.1093/jpepsy/jsz044 [published Online First: 2019/06/06]
12. O'Donnell KJ, Glover V, Lahti J, et al. Maternal prenatal anxiety and child COMT genotype predict working memory and symptoms of ADHD. *PLoS One* 2017;12(6):e0177506. doi: 10.1371/journal.pone.0177506 [published Online First: 2017/06/15]
13. Barker DJ. Fetal origins of coronary heart disease. *Br Heart J* 1993;69(3):195-6. [published Online First: 1993/03/01]
14. Barker DJ. The fetal origins of coronary heart disease. *European heart journal* 1997;18(6):883-4. [published Online First: 1997/06/01]
15. Hales CN, Barker DJ. Type 2 (non-insulin-dependent) diabetes mellitus: the thrifty phenotype hypothesis. *Diabetologia* 1992;35(7):595-601. [published Online First: 1992/07/01]

16. Gluckman P, & Hanson, M. The fetal matrix: Evolution, development, and disease. Cambridge, UK: Cambridge University Press 2005.
17. Hanson M, Gluckman P. Developmental origins of noncommunicable disease: population and public health implications. *Am J Clin Nutr* 2011 doi: ajcn.110.001206 [pii] 10.3945/ajcn.110.001206 [published Online First: 2011/04/29]
18. Jones A, Osmond C, Godfrey KM, et al. Evidence for developmental programming of cerebral laterality in humans. *PLoS One* 2011;6(2):e17071. doi: 10.1371/journal.pone.0017071 [published Online First: 2011/03/02]
19. Godfrey KM, Gluckman PD, Hanson MA. Developmental origins of metabolic disease: life course and intergenerational perspectives. *Trends Endocrinol Metab* 2010;21(4):199-205. doi: S1043-2760(09)00219-7 [pii] 10.1016/j.tem.2009.12.008 [published Online First: 2010/01/19]
20. Bergman K, Sarkar P, O'Connor TG, et al. Maternal stress during pregnancy predicts cognitive ability and fearfulness in infancy. *J Am Acad Child Adolesc Psychiatry* 2007;46(11):1454-63. doi: 10.1097/chi.0b013e31814a62f6 [published Online First: 2007/12/01]
21. Buitelaar JK, Huizink AC, Mulder EJ, et al. Prenatal stress and cognitive development and temperament in infants. *Neurobiol Aging* 2003;24 Suppl 1:S53-60; discussion S67-8. doi: 10.1016/s0197-4580(03)00050-2 [published Online First: 2003/06/28]
22. DiPietro JA, Hilton SC, Hawkins M, et al. Maternal stress and affect influence fetal neurobehavioral development. *Dev Psychol* 2002;38(5):659-68. [published Online First: 2002/09/11]
23. Lobel M, Dunkel-Schetter C, Scrimshaw SC. Prenatal maternal stress and prematurity: a prospective study of socioeconomically disadvantaged women. *Health Psychol* 1992;11(1):32-40. doi: 10.1037//0278-6133.11.1.32 [published Online First: 1992/01/01]
24. O'Connor TG, Heron J, Golding J, et al. Maternal antenatal anxiety and behavioural/emotional problems in children: a test of a programming hypothesis. *J Child Psychol Psychiatry* 2003;44(7):1025-36. doi: 10.1111/1469-7610.00187 [published Online First: 2003/10/09]
25. Stapleton LR, Schetter CD, Westling E, et al. Perceived partner support in pregnancy predicts lower maternal and infant distress. *J Fam Psychol* 2012;26(3):453-63. doi: 10.1037/a0028332 [published Online First: 2012/06/06]
26. Beijers R, Buitelaar JK, de Weerth C. Mechanisms underlying the effects of prenatal psychosocial stress on child outcomes: beyond the HPA axis. *Eur Child Adolesc Psychiatry* 2014;23(10):943-56. doi: 10.1007/s00787-014-0566-3 [published Online First: 2014/05/31]
27. Gao Y, Huang Y, Li X. Interaction between prenatal maternal stress and autonomic arousal in predicting conduct problems and psychopathic traits in children. *J Psychopathol Behav Assess* 2017;39(1):1-14. doi: 10.1007/s10862-016-9556-8 [published Online First: 2017/03/14]
28. Hantsoo L, Kornfield S, Anguera MC, et al. Inflammation: A Proposed Intermediary Between Maternal Stress and Offspring Neuropsychiatric Risk. *Biol Psychiatry* 2019;85(2):97-106. doi: 10.1016/j.biopsych.2018.08.018 [published Online First: 2018/10/14]
29. Hechler C, Borewicz K, Beijers R, et al. Association between Psychosocial Stress and Fecal Microbiota in Pregnant Women. *Sci Rep* 2019;9(1):4463. doi: 10.1038/s41598-019-40434-8 [published Online First: 2019/03/16]
30. Thayer ZM, Wilson MA, Kim AW, et al. Impact of prenatal stress on offspring glucocorticoid levels: A phylogenetic meta-analysis across 14 vertebrate species. *Sci Rep* 2018;8(1):4942. doi: 10.1038/s41598-018-23169-w [published Online First: 2018/03/23]
31. O'Donnell KJ, Bugge Jensen A, Freeman L, et al. Maternal prenatal anxiety and downregulation of placental 11 $\beta$ -HSD2. *Psychoneuroendocrinology* 2012;37(6):818-26. doi: 10.1016/j.psyneuen.2011.09.014 [published Online First: 2011/10/18]

- 1  
2  
3  
4 32. Seth S, Lewis AJ, Saffery R, et al. Maternal Prenatal Mental Health and Placental 11 $\beta$ -HSD2 Gene  
5 Expression: Initial Findings from the Mercy Pregnancy and Emotional Wellbeing Study. *Int J Mol*  
6 *Sci* 2015;16(11):27482-96. doi: 10.3390/ijms161126034 [published Online First: 2015/11/26]  
7  
8 33. Kivlighan KT, DiPietro JA, Costigan KA, et al. Diurnal rhythm of cortisol during late pregnancy:  
9 associations with maternal psychological well-being and fetal growth.  
10 *Psychoneuroendocrinology* 2008;33(9):1225-35. doi: 10.1016/j.psyneuen.2008.06.008  
11 [published Online First: 2008/08/12]  
12  
13 34. Niknazar S, Nahavandi A, Najafi R, et al. Parents' adulthood stress induces behavioral and hormonal  
14 alterations in male rat offspring. *Behav Brain Res* 2013;252:136-43. doi:  
15 10.1016/j.bbr.2013.05.026 [published Online First: 2013/05/30]  
16  
17 35. O'Keane V, Lightman S, Marsh M, et al. Increased pituitary-adrenal activation and shortened  
18 gestation in a sample of depressed pregnant women: a pilot study. *J Affect Disord* 2011;130(1-  
19 2):300-5. doi: 10.1016/j.jad.2010.10.004 [published Online First: 2010/11/26]  
20  
21 36. Obel C, Hedegaard M, Henriksen TB, et al. Stress and salivary cortisol during pregnancy.  
22 *Psychoneuroendocrinology* 2005;30(7):647-56. doi: 10.1016/j.psyneuen.2004.11.006 [published  
23 Online First: 2005/04/28]  
24  
25 37. Suglia SF, Staudenmayer J, Cohen S, et al. Cumulative Stress and Cortisol Disruption among Black and  
26 Hispanic Pregnant Women in an Urban Cohort. *Psychol Trauma* 2010;2(4):326-34. doi:  
27 10.1037/a0018953 [published Online First: 2011/03/23]  
28  
29 38. Malkova NV, Yu CZ, Hsiao EY, et al. Maternal immune activation yields offspring displaying mouse  
30 versions of the three core symptoms of autism. *Brain, behavior, and immunity* 2012;26(4):607-  
31 16. doi: 10.1016/j.bbi.2012.01.011 [published Online First: 2012/02/09]  
32  
33 39. Monje ML, Toda H, Palmer TD. Inflammatory blockade restores adult hippocampal neurogenesis.  
34 *Science* 2003;302(5651):1760-5. doi: 10.1126/science.1088417 [published Online First:  
35 2003/11/15]  
36  
37 40. Short SJ, Lubach GR, Karasin AI, et al. Maternal influenza infection during pregnancy impacts  
38 postnatal brain development in the rhesus monkey. *Biological psychiatry* 2010;67(10):965-73.  
39 doi: 10.1016/j.biopsych.2009.11.026 [published Online First: 2010/01/19]  
40  
41 41. Allswede DM, Yolken RH, Buka SL, et al. Cytokine concentrations throughout pregnancy and risk for  
42 psychosis in adult offspring: a longitudinal case-control study. *Lancet Psychiatry* 2020;7(3):254-  
43 61. doi: 10.1016/s2215-0366(20)30006-7 [published Online First: 2020/02/09]  
44  
45 42. Brown AS, Begg MD, Gravenstein S, et al. Serologic evidence of prenatal influenza in the etiology of  
46 schizophrenia. *Arch Gen Psychiatry* 2004;61(8):774-80. doi: 10.1001/archpsyc.61.8.774  
47 [published Online First: 2004/08/04]  
48  
49 43. Zerbo O, Iosif AM, Walker C, et al. Is maternal influenza or fever during pregnancy associated with  
50 autism or developmental delays? Results from the CHARGE (CHildhood Autism Risks from  
51 Genetics and Environment) study. *J Autism Dev Disord* 2013;43(1):25-33. doi: 10.1007/s10803-  
52 012-1540-x [published Online First: 2012/05/09]  
53  
54 44. Day DB, Collett BR, Barrett ES, et al. Prenatal sex hormones and behavioral outcomes in children.  
55 *Psychoneuroendocrinology* 2020;113:104547. doi: 10.1016/j.psyneuen.2019.104547 [published  
56 Online First: 2020/01/07]  
57  
58 45. Brüggemann M, Licht O, Fetter É, et al. Knotting nets: Molecular junctions of interconnecting  
59 endocrine axes identified by application of the adverse outcome pathway concept. *Environ*  
60 *Toxicol Chem* 2018;37(2):318-28. doi: 10.1002/etc.3995 [published Online First: 2017/10/07]  
61  
62 46. Izvolkskaia MS, Tillet Y, Sharova VS, et al. Disruptions in the hypothalamic-pituitary-gonadal axis in rat  
63 offspring following prenatal maternal exposure to lipopolysaccharide. *Stress* 2016;19(2):198-  
64 205. doi: 10.3109/10253890.2016.1149695 [published Online First: 2016/03/05]  
65  
66  
67  
68  
69  
70

- 1  
2  
3  
4  
5  
6  
7  
8  
9  
10  
11  
12  
13  
14  
15  
16  
17  
18  
19  
20  
21  
22  
23  
24  
25  
26  
27  
28  
29  
30  
31  
32  
33  
34  
35  
36  
37  
38  
39  
40  
41  
42  
43  
44  
45  
46  
47  
48  
49  
50  
51  
52  
53  
54  
55  
56  
57  
58  
59  
60
47. Nguyen TV, Jones SL, Elgbeili G, et al. Testosterone-cortisol dissociation in children exposed to prenatal maternal stress, and relationship with aggression: Project Ice Storm. *Dev Psychopathol* 2018;30(3):981-94. doi: 10.1017/s0954579418000652 [published Online First: 2018/08/03]
  48. Sarkar P, Bergman K, Fisk NM, et al. Amniotic fluid testosterone: relationship with cortisol and gestational age. *Clin Endocrinol (Oxf)* 2007;67(5):743-7. doi: 10.1111/j.1365-2265.2007.02955.x [published Online First: 2007/07/20]
  49. Jansson T, Powell TL. Role of the placenta in fetal programming: underlying mechanisms and potential interventional approaches. *Clin Sci (Lond)* 2007;113(1):1-13. doi: 10.1042/cs20060339 [published Online First: 2007/06/01]
  50. Thornburg KL, Marshall N. The placenta is the center of the chronic disease universe. *Am J Obstet Gynecol* 2015;213(4 Suppl):S14-20. doi: 10.1016/j.ajog.2015.08.030 [published Online First: 2015/10/03]
  51. Chambers JC, Fusi L, Malik IS, et al. Association of maternal endothelial dysfunction with preeclampsia. *Jama* 2001;285(12):1607-12. doi: 10.1001/jama.285.12.1607 [published Online First: 2001/04/13]
  52. Ray JG, Vermeulen MJ, Schull MJ, et al. Cardiovascular health after maternal placental syndromes (CHAMPS): population-based retrospective cohort study. *Lancet* 2005;366(9499):1797-803. doi: 10.1016/s0140-6736(05)67726-4 [published Online First: 2005/11/22]
  53. Seely EW, Tsigas E, Rich-Edwards JW. Preeclampsia and future cardiovascular disease in women: How good are the data and how can we manage our patients? *Semin Perinatol* 2015;39(4):276-83. doi: 10.1053/j.semperi.2015.05.006 [published Online First: 2015/06/29]
  54. Li Q, Kappil MA, Li A, et al. Exploring the associations between microRNA expression profiles and environmental pollutants in human placenta from the National Children's Study (NCS). *Epigenetics* 2015;10(9):793-802. doi: 10.1080/15592294.2015.1066960 [published Online First: 2015/08/08]
  55. Tegethoff M, Greene N, Olsen J, et al. Maternal psychosocial stress during pregnancy and placenta weight: evidence from a national cohort study. *PLoS One* 2010;5(12):e14478. doi: 10.1371/journal.pone.0014478 [published Online First: 2011/01/11]
  56. Yang C, Song G, Lim W. A mechanism for the effect of endocrine disrupting chemicals on placentation. *Chemosphere* 2019;231:326-36. doi: 10.1016/j.chemosphere.2019.05.133 [published Online First: 2019/05/28]
  57. Park BY, Misra DP, Moye J, et al. Placental gross shape differences in a high autism risk cohort and the general population. *PLoS One* 2018;13(8):e0191276. doi: 10.1371/journal.pone.0191276 [published Online First: 2018/08/23]
  58. Chang JM, Zeng H, Han R, et al. Autism risk classification using placental chorionic surface vascular network features. *BMC Med Inform Decis Mak* 2017;17(1):162. doi: 10.1186/s12911-017-0564-8 [published Online First: 2017/12/08]
  59. Misra DP, Salafia CM, Charles AK, et al. Placental measurements associated with intelligence quotient at age 7 years. *J Dev Orig Health Dis* 2012;3(3):190-7. doi: 10.1017/s2040174412000141 [published Online First: 2012/06/01]
  60. Meyer TJ, Miller ML, Metzger RL, et al. Development and validation of the Penn State Worry Questionnaire. *Behav Res Ther* 1990;28(6):487-95. doi: 10.1016/0005-7967(90)90135-6 [published Online First: 1990/01/01]
  61. O'Connor TG, Scheible K, Sefair AV, et al. Immune and neuroendocrine correlates of temperament in infancy. *Dev Psychopathol* 2017;29(5):1589-600. doi: 10.1017/s0954579417001250 [published Online First: 2017/11/23]



- 1  
2  
3 62. Goodman JH, Guarino A, Chenausky K, et al. CALM Pregnancy: results of a pilot study of mindfulness-  
4 based cognitive therapy for perinatal anxiety. *Arch Womens Ment Health* 2014;17(5):373-87.  
5 doi: 10.1007/s00737-013-0402-7 [published Online First: 2014/01/23]  
6  
7 63. Cox JL, Holden JM, Sagovsky R. Detection of postnatal depression. Development of the 10-item  
8 Edinburgh Postnatal Depression Scale. *Br J Psychiatry* 1987;150:782-6. doi:  
9 10.1192/bjp.150.6.782 [published Online First: 1987/06/01]  
10  
11 64. McFarlane J, Parker B, Soeken K, et al. Assessing for abuse during pregnancy. Severity and frequency  
12 of injuries and associated entry into prenatal care. *Jama* 1992;267(23):3176-8. doi:  
13 10.1001/jama.267.23.3176 [published Online First: 1992/06/17]  
14  
15 65. Robertson Blackmore E, Mittal M, Cai X, et al. Lifetime Exposure to Intimate Partner Violence and  
16 Proinflammatory Cytokine Levels Across the Perinatal Period. *J Womens Health (Larchmt)*  
17 2016;25(10):1004-13. doi: 10.1089/jwh.2015.5261 [published Online First: 2016/10/18]  
18  
19 66. Cohen S, Kamarack T, Mermelstein R. A Global Measure of Perceived Stress. *Journal of Health and*  
20 *Social Behavior* 1983;24:385-96.  
21  
22 67. Barnett BE, Hanna B, Parker G. Life event scales for obstetric groups. *J Psychosom Res*  
23 1983;27(4):313-20. doi: 10.1016/0022-3999(83)90054-5 [published Online First: 1983/01/01]  
24  
25 68. Felitti VJ, Anda RF, Nordenberg D, et al. Relationship of childhood abuse and household dysfunction  
26 to many of the leading causes of death in adults. The Adverse Childhood Experiences (ACE)  
27 Study. *Am J Prev Med* 1998;14(4):245-58. doi: 10.1016/s0749-3797(98)00017-8 [published  
28 Online First: 1998/06/23]  
29  
30 69. Krieger N, Smith K, Naishadham D, et al. Experiences of discrimination: validity and reliability of a  
31 self-report measure for population health research on racism and health. *Soc Sci Med*  
32 2005;61(7):1576-96. doi: 10.1016/j.socscimed.2005.03.006 [published Online First: 2005/07/12]  
33  
34 70. Buss AH, Perry M. The aggression questionnaire. *J Pers Soc Psychol* 1992;63(3):452-9. doi:  
35 10.1037//0022-3514.63.3.452 [published Online First: 1992/09/01]  
36  
37 71. Ewart CK, Suchday S. Discovering how urban poverty and violence affect health: development and  
38 validation of a Neighborhood Stress Index. *Health Psychol* 2002;21(3):254-62. doi:  
39 10.1037//0278-6133.21.3.254 [published Online First: 2002/05/25]  
40  
41 72. Cohen S, Mermelstein R, Kamarck T, et al. Measuring the functional components of social support.  
42 In: Sarason I, Sarason B, eds. *Social support: Theory, research, and application*. The Hague, The  
43 Netherlands: Martinus Nijhoff 1985:73-94.  
44  
45 73. Funk JL, Rogge RD. Testing the ruler with item response theory: increasing precision of measurement  
46 for relationship satisfaction with the Couples Satisfaction Index. *J Fam Psychol* 2007;21(4):572-  
47 83. doi: 10.1037/0893-3200.21.4.572 [published Online First: 2008/01/09]  
48  
49 74. Chasan-Taber L, Schmidt MD, Roberts DE, et al. Development and validation of a Pregnancy Physical  
50 Activity Questionnaire. *Med Sci Sports Exerc* 2004;36(10):1750-60. doi:  
51 10.1249/01.mss.0000142303.49306.0d [published Online First: 2004/12/15]  
52  
53 75. Buysse DJ, Reynolds CF, 3rd, Monk TH, et al. The Pittsburgh Sleep Quality Index: a new instrument  
54 for psychiatric practice and research. *Psychiatry Res* 1989;28(2):193-213. doi: 10.1016/0165-  
55 1781(89)90047-4 [published Online First: 1989/05/01]  
56  
57 76. Johnson RK, Driscoll P, Goran MI. Comparison of multiple-pass 24-hour recall estimates of energy  
58 intake with total energy expenditure determined by the doubly labeled water method in young  
59 children. *J Am Diet Assoc* 1996;96(11):1140-4. doi: 10.1016/s0002-8223(96)00293-3 [published  
60 Online First: 1996/11/01]  
77. Feskanich D, Sielaff BH, Chong K, et al. Computerized collection and analysis of dietary intake  
information. *Comput Methods Programs Biomed* 1989;30(1):47-57. doi: 10.1016/0169-  
2607(89)90122-3 [published Online First: 1989/09/01]

- 1  
2  
3 78. Tooze JA, Midthune D, Dodd KW, et al. A new statistical method for estimating the usual intake of  
4 episodically consumed foods with application to their distribution. *J Am Diet Assoc*  
5 2006;106(10):1575-87. doi: 10.1016/j.jada.2006.07.003 [published Online First: 2006/09/27]  
6  
7 79. Peters M, Laeng B, Latham K, et al. A redrawn Vandenberg and Kuse mental rotations test: different  
8 versions and factors that affect performance. *Brain Cogn* 1995;28(1):39-58. doi:  
9 10.1006/brcg.1995.1032 [published Online First: 1995/06/01]  
10  
11 80. Drozdick L, Wahlstrom D, Zhu J, et al. The Wechsler Adult Intelligence Scale—Fourth Edition and the  
12 Wechsler Memory Scale—Fourth Edition. In: Flanagan D, Harrison P, eds. Contemporary  
13 intellectual assessment: Theories, tests, and issues: Guilford Press 2012:197-223.  
14  
15 81. Barrett ES, Mbowe O, Thurston SW, et al. Predictors of Steroid Hormone Concentrations in Early  
16 Pregnancy: Results from a Multi-Center Cohort. *Matern Child Health J* 2019;23(3):397-407. doi:  
17 10.1007/s10995-018-02705-0 [published Online First: 2019/01/20]  
18  
19 82. Smith R, Smith JI, Shen X, et al. Patterns of plasma corticotropin-releasing hormone, progesterone,  
20 estradiol, and estriol change and the onset of human labor. *J Clin Endocrinol Metab*  
21 2009;94(6):2066-74. doi: 10.1210/jc.2008-2257 [published Online First: 2009/03/05]  
22  
23 83. Stewart J, Seeman T. Salivary Cortisol Measurement MacArthur Research Network on SES and  
24 Health2000 [Available from: <https://macses.ucsf.edu/research/allostatic/salivarycort.php>  
25 accessed August 27 2020].  
26  
27 84. Bayley N. Bayley Scales of infant and toddler development: administration manual. San Antonio, TX:  
28 Harcourt Assessment 2006.  
29  
30 85. Fenson L, Marchman V, Thal D, et al. MacArthur-Bates Communicative Development Inventories:  
31 User's Guide and Technical Manual (2nd edition)2007.  
32  
33 86. Hughes C, Ensor R. Executive function and theory of mind in 2 year olds: a family affair? *Dev*  
34 *Neuropsychol* 2005;28(2):645-68. doi: 10.1207/s15326942dn2802\_5 [published Online First:  
35 2005/09/08]  
36  
37 87. Kochanska G, Murray KT, Harlan ET. Effortful control in early childhood: continuity and change,  
38 antecedents, and implications for social development. *Dev Psychol* 2000;36(2):220-32.  
39 [published Online First: 2000/04/05]  
40  
41 88. Executive Function Scale for Preschoolers Test Manual. Minneapolis, MN: Institute of Child  
42 Development, University of Minnesota.  
43  
44 89. Weintraub S, Bauer PJ, Zelazo PD, et al. I. NIH Toolbox Cognition Battery (CB): introduction and  
45 pediatric data. *Monogr Soc Res Child Dev* 2013;78(4):1-15. doi: 10.1111/mono.12031 [published  
46 Online First: 2013/08/21]  
47  
48 90. Zelazo PD, Anderson JE, Richler J, et al. II. NIH Toolbox Cognition Battery (CB): measuring executive  
49 function and attention. *Monogr Soc Res Child Dev* 2013;78(4):16-33. doi: 10.1111/mono.12032  
50 [published Online First: 2013/08/21]  
51  
52 91. Bauer PJ, Dikmen SS, Heaton RK, et al. III. NIH Toolbox Cognition Battery (CB): measuring episodic  
53 memory. *Monogr Soc Res Child Dev* 2013;78(4):34-48. doi: 10.1111/mono.12033 [published  
54 Online First: 2013/08/21]  
55  
56 92. Gershon RC, Slotkin J, Manly JJ, et al. IV. NIH Toolbox Cognition Battery (CB): measuring language  
57 (vocabulary comprehension and reading decoding). *Monogr Soc Res Child Dev* 2013;78(4):49-69.  
58 doi: 10.1111/mono.12034 [published Online First: 2013/08/21]  
59  
60 93. Weschler D. Wechsler Preschool and Primary Scale of Intelligence. 4th ed. Bloomington, IL: Pearson  
2012.  
94. Goldsmith H, Rothbart M. The Laboratory Temperament Assessment Battery, Locomotor Version.  
3.1 ed. Madison, WI: University of Wisconsin- Madison 1999.  
95. Gartstein M, Rothbart M. Studying infant temperament via the Revised Infant Behavior  
Questionnaire. *Infant Behavior & Development* 2003;26(1):64-86.



- 1  
2  
3 96. Ainsworth MD, Bell SM. Attachment, exploration, and separation: illustrated by the behavior of one-  
4 year-olds in a strange situation. *Child Dev* 1970;41(1):49-67. [published Online First:  
5 1970/03/01]  
6  
7 97. Ainsworth MD, Blehar M, Waters E, et al. Patterns of attachment: a psychological study of the  
8 Strange Situation. Hillsdale, NJ: Lawrence Erlbaum 1978.  
9  
10 98. Connellan J, Baron-Cohen S, Wheelwright S, et al. Sex differences in human neonatal social  
11 perception. *Infant Behavior & Development* 2000;23:113-18.  
12  
13 99. Alexander GM, Wilcox T, Woods R. Sex differences in infants' visual interest in toys. *Arch Sex Behav*  
14 2009;38(3):427-33. doi: 10.1007/s10508-008-9430-1 [published Online First: 2008/11/20]  
15  
16 100. Lutchmaya S, Baron-Cohen S. Human Sex Differences in Social and Non-Social Looking Preferences  
17 at 12 months of age. *Infant Behavior & Development* 2002;25:319-25.  
18  
19 101. Moore DS, Johnson SP. Mental Rotation of Dynamic, Three-Dimensional Stimuli by 3-Month-Old  
20 Infants. *Infancy* 2011;16(4):435-45. doi: 10.1111/j.1532-7078.2010.00058.x [published Online  
21 First: 2011/07/01]  
22  
23 102. Lamminmäki A, Hines M, Kuiri-Hänninen T, et al. Testosterone measured in infancy predicts  
24 subsequent sex-typed behavior in boys and in girls. *Horm Behav* 2012;61(4):611-6. doi:  
25 10.1016/j.yhbeh.2012.02.013 [published Online First: 2012/03/01]  
26  
27 103. Wardle J, Guthrie CA, Sanderson S, et al. Development of the Children's Eating Behaviour  
28 Questionnaire. *J Child Psychol Psychiatry* 2001;42(7):963-70. doi: 10.1111/1469-7610.00792  
29 [published Online First: 2001/11/06]  
30  
31 104. Peracchio HL, Henebery KE, Sharafi M, et al. Otitis media exposure associates with dietary  
32 preference and adiposity: a community-based observational study of at-risk preschoolers.  
33 *Physiol Behav* 2012;106(2):264-71. doi: 10.1016/j.physbeh.2012.01.021 [published Online First:  
34 2012/02/16]  
35  
36 105. Musher-Eizenman D, Holub S. Comprehensive Feeding Practices Questionnaire: validation of a new  
37 measure of parental feeding practices. *J Pediatr Psychol* 2007;32(8):960-72. doi:  
38 10.1093/jpepsy/jsm037 [published Online First: 2007/05/31]  
39  
40 106. Temple JL, Legierski CM, Giacomelli AM, et al. Overweight children find food more reinforcing and  
41 consume more energy than do nonoverweight children. *Am J Clin Nutr* 2008;87(5):1121-7. doi:  
42 10.1093/ajcn/87.5.1121 [published Online First: 2008/05/13]  
43  
44 107. Westat. National Health and Nutrition Examination Survey III Body Measurements  
45 (Anthropometry). Rockville, MD1988.  
46  
47 108. Bush NR, Allison AL, Miller AL, et al. Socioeconomic Disparities in Childhood Obesity Risk:  
48 Association With an Oxytocin Receptor Polymorphism. *JAMA Pediatr* 2017;171(1):61-67. doi:  
49 10.1001/jamapediatrics.2016.2332 [published Online First: 2016/11/15]  
50  
51 109. Sathyanarayana S, Grady R, Redmon JB, et al. Anogenital distance and penile width measurements  
52 in The Infant Development and the Environment Study (TIDES): methods and predictors. *J*  
53 *Pediatr Urol* 2015;11(2):76.e1-6. doi: 10.1016/j.jpuro.2014.11.018 [published Online First:  
54 2015/04/01]  
55  
56 110. Manning JT, Scutt D, Wilson J, et al. The ratio of 2nd to 4th digit length: a predictor of sperm  
57 numbers and concentrations of testosterone, luteinizing hormone and oestrogen. *Hum Reprod*  
58 1998;13(11):3000-4. doi: 10.1093/humrep/13.11.3000 [published Online First: 1998/12/16]  
59  
60 111. Grier A, Qiu X, Bandyopadhyay S, et al. Impact of prematurity and nutrition on the developing gut  
microbiome and preterm infant growth. *Microbiome* 2017;5(1):158. doi: 10.1186/s40168-017-  
0377-0 [published Online First: 2017/12/13]

**Table 1. Baseline characteristics of mother-child dyads participating in UPSIDE (n=294<sup>1</sup>).**

|                                             | Mean (SD)      | Min-Max     | n (%)      |
|---------------------------------------------|----------------|-------------|------------|
| <b>Maternal characteristics<sup>2</sup></b> |                |             |            |
| <b>Continuous/ordinal</b>                   |                |             |            |
| Age (years)                                 | 28.9 (4.7)     | 18-41       |            |
| Pre-pregnancy BMI (kg/m <sup>2</sup> )      | 27.2 (6.9)     | 16.98-49.77 |            |
| Poverty to income ratio                     | 3.8 (3.9)      | 0.04-44.6   |            |
| Household size (persons)                    | 3.2 (1.5)      | 1-11        |            |
| Sleep (Pittsburgh Sleep Index)              | 6.3 (3.5)      | 0-17        |            |
| <b>Categorical</b>                          |                |             |            |
| Race                                        |                |             |            |
| White                                       |                |             | 180 (61.2) |
| Black                                       |                |             | 75 (25.5)  |
| Asian                                       |                |             | 11 (3.7)   |
| Mixed Race                                  |                |             | 8 (2.7)    |
| Other <sup>3</sup>                          |                |             | 20 (6.8)   |
| Hispanic                                    |                |             | 29 (9.9)   |
| Education                                   |                |             |            |
| <High school                                |                |             | 8 (2.9)    |
| High school                                 |                |             | 85 (31.3)  |
| Some college                                |                |             | 39 (14.3)  |
| College degree                              |                |             | 70 (25.7)  |
| Post-college degree                         |                |             | 70 (25.7)  |
| Employed                                    |                |             | 215 (74.9) |
| Married/living as married                   |                |             | 173 (60.3) |
| Medicaid status                             |                |             | 110 (42.1) |
| Nulliparous                                 |                |             | 82 (31.3)  |
| Smoking during pregnancy (any)              |                |             | 23 (7.8)   |
| Alcohol use during pregnancy (any)          |                |             | 10 (3.4)   |
| <b>Paternal characteristics<sup>2</sup></b> |                |             |            |
| Age (years)                                 | 30.9 (5.6)     | 18 – 57     |            |
| Race                                        |                |             |            |
| White                                       |                |             | 170 (59.9) |
| Black                                       |                |             | 79 (27.8)  |
| Asian                                       |                |             | 5 (1.8)    |
| Other <sup>3</sup>                          |                |             | 30 (10.6)  |
| <b>Infant characteristics</b>               |                |             |            |
| Female                                      |                |             | 152 (51.7) |
| Gestational age at birth (weeks)            | 39.5 (1.6)     | 27.7-42.7   |            |
| Birth weight (g)                            | 3352.8 (495.0) | 2195-4654   |            |
| Birth length (cm)                           | 51.1 (3.1)     | 40-60       |            |

1 n's for individual variables may differ slightly due to missing data

2 At time of enrollment, with the exception of Sleep which was assessed in the second trimester.

3 "Other" includes American Indian/Alaska Native and individuals self-reporting as "other".

**Table 2. Psychosocial assessments repeated across pregnancy.**

| Scale                      | Trimester 1           | Trimester 2           | Trimester 3           | ICC |
|----------------------------|-----------------------|-----------------------|-----------------------|-----|
|                            | mean±SD; (range)      | mean±SD; (range)      | mean±SD; (range)      |     |
| Depressive Symptoms (EPDS) | 5.56 ± 4.73 (0-21)    | 5.94 ± 4.93 (0-23)    | 5.95 ± 5.13 (0-29)    | .73 |
| Anxiety Symptoms (PSWQ)    | 44.41 ± 13.36 (16-77) | 44.09 ± 13.72 (17-80) | 44.31 ± 13.69 (16-80) | .80 |
| Pregnancy Specific Anxiety |                       |                       |                       |     |
| Worries about the baby     | 7.97 ± 4.3 (4-20)     | 7.24 ± 3.77 (4-20)    | 7.18 ± 3.99 (4-20)    | .68 |
| Worries about delivery     | 6.96 ± 3.64 (3-15)    | 6.65 ± 3.46 (3-15)    | 7.19 ± 3.47 (3-15)    | .72 |
| Perceived Stress (PSS)     | 19.9 ± 8.11 (2-42)    | 20.03 ± 8.1 (0-49)    | 19.83 ± 8.03 (2-39)   | .77 |

Abbreviations: EPDS: Edinburgh Postnatal Depression Scale; ICC: Interclass correlation coefficient; PSS: Perceived Stress; PSWQ: Penn State Worry Questionnaire

**Table 3. Summary of UPSIDE child assessments.**

|                                                | Age at assessment (months) |   |   |    |    |    |    |
|------------------------------------------------|----------------------------|---|---|----|----|----|----|
|                                                | birth                      | 1 | 6 | 12 | 24 | 36 | 48 |
| <b>Anthropometric measures</b>                 |                            |   |   |    |    |    |    |
| Height/weight                                  | x                          | x | x | x  | x  | x  | x  |
| Head circumference                             | x                          | x | x | x  | x  | x  | x  |
| Skinfold thickness                             | x                          | x | x | x  | x  | x  | x  |
| Anogenital distance                            | x                          | x | x | x  | x  |    |    |
| Waist circumference                            |                            |   |   |    |    | x  | x  |
| Digit ratio                                    |                            |   |   |    |    | x  | x  |
| <b>Neurodevelopmental measures (by domain)</b> |                            |   |   |    |    |    |    |
| <i>Temperament</i>                             |                            |   |   |    |    |    |    |
| Rothbart- IBQ                                  |                            |   | x | x  | x  |    |    |
| Lab-TAB                                        |                            |   | x | x  | x  |    |    |
| <i>Cognition/language/EF</i>                   |                            |   |   |    |    |    |    |
| BSID                                           |                            |   | x | x  | x  |    |    |
| WPPSI-IV                                       |                            |   |   |    |    |    | x  |
| Macarthur Bates                                |                            |   |   |    | x  | x  |    |
| NIH Toolbox                                    |                            |   |   |    | x  | x  |    |
| Executive function                             |                            |   |   |    | x  | x  |    |
| <i>Neuroimaging</i>                            |                            |   |   |    |    |    |    |
| MRI                                            |                            | x |   |    |    |    | x  |
| EEG                                            |                            |   |   |    | x  | x  |    |
| <i>Sex-typical/dimorphic</i>                   |                            |   |   |    |    |    |    |
| Face preference                                |                            | x | x |    |    |    |    |
| Toy preference                                 |                            |   | x | x  | x  |    |    |
| Social preference                              |                            |   | x | x  | x  |    |    |
| Mental rotation                                |                            |   | x | x  | x  | x  |    |
| Sex-typical play behavior                      |                            |   |   | x  | x  |    |    |
| <b>Lifestyle measures</b>                      |                            |   |   |    |    |    |    |
| Sleep                                          |                            | x | x | x  | x  | x  | x  |
| <i>Diet</i>                                    |                            |   |   |    |    |    |    |
| Infant feeding questionnaire                   |                            | x | x | x  |    |    |    |
| 24-hour dietary recall                         |                            |   |   |    |    | x  |    |
| Eating behavior                                |                            |   |   |    |    | x  |    |

Abbreviations: BSID: Bayley Scales of Infant Development; EEG: Electroencephalogram; EF: Executive function; IBQ: Infant Behavior Questionnaire; MRI: Magnetic Resonance Imaging; NIH: National Institutes of Health; WPPSI: Wechsler Preschool and Primary Scale of Intelligence

**Table 4. Summary of UPSIDE biospecimen collections.**

|                  | Prenatal<br>(trimesters) |   |   | Birth | Infant/Child postnatal<br>(months) |   |    |    |    |    |
|------------------|--------------------------|---|---|-------|------------------------------------|---|----|----|----|----|
|                  | 1                        | 2 | 3 |       | 1                                  | 6 | 12 | 24 | 36 | 48 |
| Blood            |                          |   |   |       |                                    |   |    |    |    |    |
| Serum            | M                        | M | M | UC    |                                    |   |    |    |    |    |
| Plasma           | M                        | M | M | UC    |                                    | C | C  |    |    | C  |
| Whole blood      |                          |   | M |       |                                    |   |    |    |    |    |
| Red blood cells  | M                        | M | M |       |                                    | C | C  |    |    | C  |
| Urine            | M                        | M | M |       | C                                  | C | C  |    |    | C  |
| Saliva           |                          |   |   |       |                                    |   |    |    |    |    |
| Diurnal (5x/day) | M                        | M | M |       |                                    |   |    |    |    |    |
| Stress response  |                          |   |   |       |                                    | C | C  | C  |    | C  |
| Oral microbiome  | M                        | M | M |       |                                    | C | C  | C  |    | C  |
| Vaginal swab     |                          |   | M |       |                                    |   |    |    |    |    |
| Placental tissue |                          |   |   | P     |                                    |   |    |    |    |    |
| Buccal swab      |                          |   | M | C     |                                    |   | C  | C  |    |    |
| Rectal swab      |                          |   |   | C     | C                                  | C | C  | C  |    |    |
| Stool            |                          |   |   |       | C                                  | C |    |    |    |    |
| Breast milk      |                          |   |   |       | M                                  | M |    |    |    |    |
| Nails            |                          |   |   |       |                                    |   | C  | C  |    |    |

M=maternal; C=child; UC=umbilical cord (artery and vein); P=placenta

1  
2  
3 **Figure 1. Consort figure on recruitment and retention in the UPSIDE study (n=326).**  
4  
5  
6  
7  
8  
9  
10  
11  
12  
13  
14  
15  
16  
17  
18  
19  
20  
21  
22  
23  
24  
25  
26  
27  
28  
29  
30  
31  
32  
33  
34  
35  
36  
37  
38  
39  
40  
41  
42  
43  
44  
45  
46  
47  
48  
49  
50  
51  
52  
53  
54  
55  
56  
57  
58  
59  
60

For peer review only

1  
2  
3  
4  
5  
6  
7  
8  
9  
10  
11  
12  
13  
14  
15  
16  
17  
18  
19  
20  
21  
22  
23  
24  
25  
26  
27  
28  
29  
30  
31  
32  
33  
34  
35  
36  
37  
38  
39  
40  
41  
42  
43  
44  
45  
46  
47  
48  
49  
50  
51  
52  
53  
54  
55  
56  
57  
58  
59  
60

**Figure 2. Timing of placental delivery in relation to standard work hours (spontaneous births only).**

For peer review only

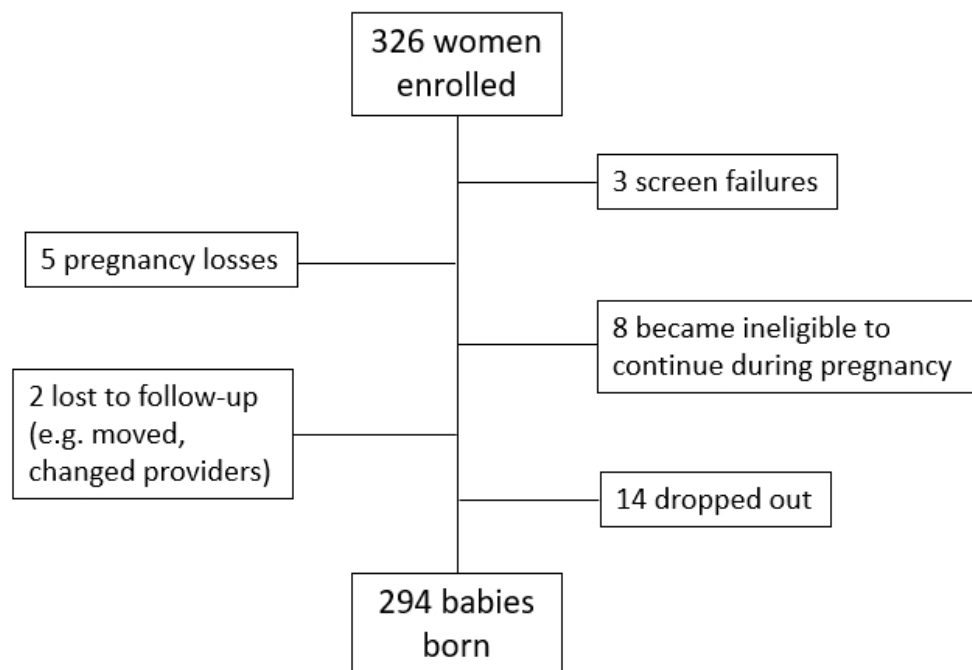

28  
29  
30  
31  
32  
33  
34  
35  
36  
37  
38  
39  
40  
41  
42  
43  
44  
45  
46  
47  
48  
49  
50  
51  
52  
53  
54  
55  
56  
57  
58  
59  
60

Figure 1. Consort figure on recruitment and retention in the UPSIDE study (n=326).



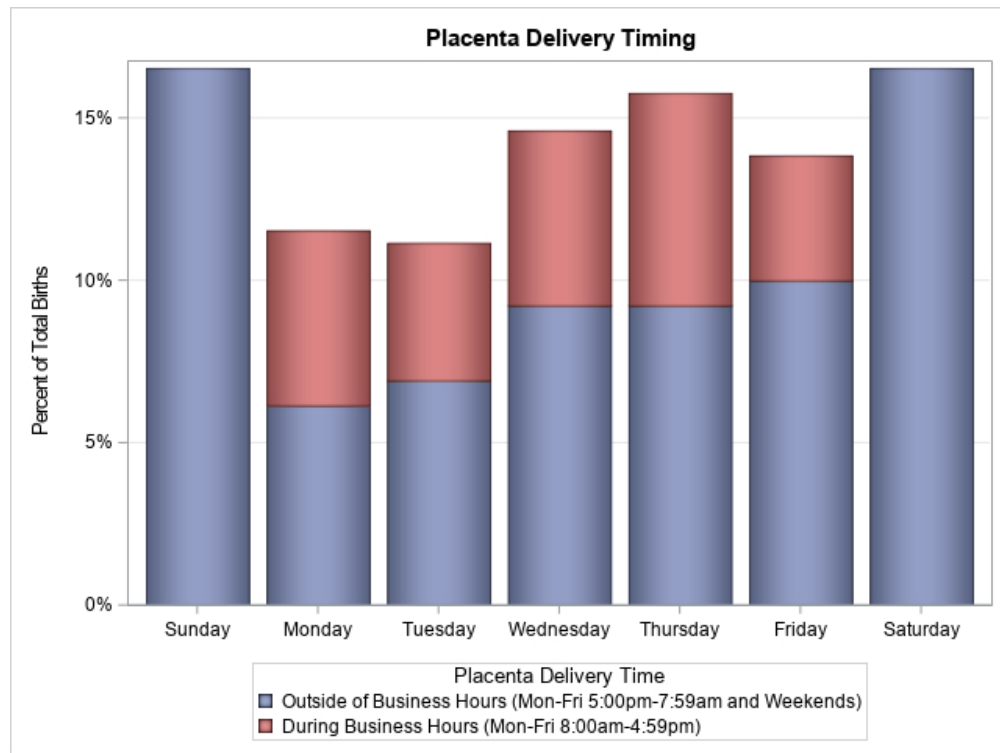

Figure 2. Timing of placental delivery in relation to standard work hours (spontaneous births only).

# BMJ Open

## Cohort profile: Understanding Pregnancy Signals and Infant Development (UPSIDE), a pregnancy cohort study on prenatal exposure mechanisms for child health

|                                 |                                                                                                                                                                                                                                                                                                                                                                                                                                                                                                                                                                                                                                                                                                                                                                                                                                                                                                                                                                                                                                                                                                                                                                                                                                                                                                                                                                                                                                                                                                                                                                                                                                                                                |
|---------------------------------|--------------------------------------------------------------------------------------------------------------------------------------------------------------------------------------------------------------------------------------------------------------------------------------------------------------------------------------------------------------------------------------------------------------------------------------------------------------------------------------------------------------------------------------------------------------------------------------------------------------------------------------------------------------------------------------------------------------------------------------------------------------------------------------------------------------------------------------------------------------------------------------------------------------------------------------------------------------------------------------------------------------------------------------------------------------------------------------------------------------------------------------------------------------------------------------------------------------------------------------------------------------------------------------------------------------------------------------------------------------------------------------------------------------------------------------------------------------------------------------------------------------------------------------------------------------------------------------------------------------------------------------------------------------------------------|
| Journal:                        | <i>BMJ Open</i>                                                                                                                                                                                                                                                                                                                                                                                                                                                                                                                                                                                                                                                                                                                                                                                                                                                                                                                                                                                                                                                                                                                                                                                                                                                                                                                                                                                                                                                                                                                                                                                                                                                                |
| Manuscript ID                   | bmjopen-2020-044798.R1                                                                                                                                                                                                                                                                                                                                                                                                                                                                                                                                                                                                                                                                                                                                                                                                                                                                                                                                                                                                                                                                                                                                                                                                                                                                                                                                                                                                                                                                                                                                                                                                                                                         |
| Article Type:                   | Cohort profile                                                                                                                                                                                                                                                                                                                                                                                                                                                                                                                                                                                                                                                                                                                                                                                                                                                                                                                                                                                                                                                                                                                                                                                                                                                                                                                                                                                                                                                                                                                                                                                                                                                                 |
| Date Submitted by the Author:   | 08-Feb-2021                                                                                                                                                                                                                                                                                                                                                                                                                                                                                                                                                                                                                                                                                                                                                                                                                                                                                                                                                                                                                                                                                                                                                                                                                                                                                                                                                                                                                                                                                                                                                                                                                                                                    |
| Complete List of Authors:       | <p>o'Connor, Thomas; University of Rochester , Psychiatry; Neuroscience; Obstetrics and Gynecology; Wynne Center for Family Research</p> <p>Best, Meghan; University of Rochester Medical Center, Obstetrics and Gynecology</p> <p>Brunner, Jessica; University of Rochester Medical Center, Psychiatry; Obstetrics and Gynecology; School of Nursing</p> <p>Ciesla, Allison; University of Rochester Medical Center, Public Health Sciences</p> <p>Cunning, Allison; University of Rochester Medical Center, Obstetrics and Gynecology</p> <p>Kapula, Ntemena; University of Rochester Medical Center, Obstetrics and Gynecology; School of Nursing</p> <p>Kautz, Amber; University of Rochester Medical Center, Public Health Sciences</p> <p>Khoury, Leena; University of Rochester Medical Center, Psychiatry; Obstetrics and Gynecology</p> <p>Macomber, Allison; University of Rochester Medical Center, Obstetrics and Gynecology</p> <p>Meng, Ying; University of Rochester, School of Nursing</p> <p>Miller, Richard; University of Rochester Medical Center, Obstetrics and Gynecology</p> <p>Murphy, Hannah; University of Rochester Medical Center, Obstetrics and Gynecology</p> <p>Salafia, Carolyn; Institute for Basic Research in Developmental Disabilities, Placental Modulation Laboratory; Placental Analytics LLC</p> <p>Vallejo Sefair, Ana; University of Rochester Medical Center, Psychology</p> <p>Serrano, Jishyra; University of Rochester Medical Center, Obstetrics and Gynecology</p> <p>Barrett, Emily; Rutgers University, Department of Biostatistics and Epidemiology; School of Public Health; University of Rochester Medical Center</p> |
| <b>Primary Subject Heading</b>: | Public health                                                                                                                                                                                                                                                                                                                                                                                                                                                                                                                                                                                                                                                                                                                                                                                                                                                                                                                                                                                                                                                                                                                                                                                                                                                                                                                                                                                                                                                                                                                                                                                                                                                                  |
| Secondary Subject Heading:      | Epidemiology, Paediatrics, Obstetrics and gynaecology                                                                                                                                                                                                                                                                                                                                                                                                                                                                                                                                                                                                                                                                                                                                                                                                                                                                                                                                                                                                                                                                                                                                                                                                                                                                                                                                                                                                                                                                                                                                                                                                                          |
| Keywords:                       | EPIDEMIOLOGY, OBSTETRICS, PAEDIATRICS, PUBLIC HEALTH                                                                                                                                                                                                                                                                                                                                                                                                                                                                                                                                                                                                                                                                                                                                                                                                                                                                                                                                                                                                                                                                                                                                                                                                                                                                                                                                                                                                                                                                                                                                                                                                                           |

1  
2  
3  
4  
5  
6  
7  
8  
9  
10  
11  
12  
13  
14  
15  
16  
17  
18  
19  
20  
21  
22  
23  
24  
25  
26  
27  
28  
29  
30  
31  
32  
33  
34  
35  
36  
37  
38  
39  
40  
41  
42  
43  
44  
45  
46  
47  
48  
49  
50  
51  
52  
53  
54  
55  
56  
57  
58  
59  
60

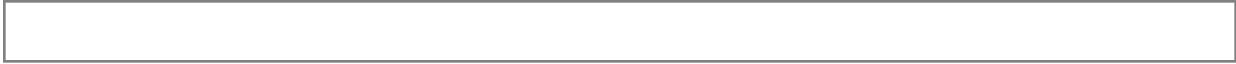

SCHOLARONE™  
Manuscripts



I, the Submitting Author has the right to grant and does grant on behalf of all authors of the Work (as defined in the below author licence), an exclusive licence and/or a non-exclusive licence for contributions from authors who are: i) UK Crown employees; ii) where BMJ has agreed a CC-BY licence shall apply, and/or iii) in accordance with the terms applicable for US Federal Government officers or employees acting as part of their official duties; on a worldwide, perpetual, irrevocable, royalty-free basis to BMJ Publishing Group Ltd ("BMJ") its licensees and where the relevant Journal is co-owned by BMJ to the co-owners of the Journal, to publish the Work in this journal and any other BMJ products and to exploit all rights, as set out in our [licence](#).

The Submitting Author accepts and understands that any supply made under these terms is made by BMJ to the Submitting Author unless you are acting as an employee on behalf of your employer or a postgraduate student of an affiliated institution which is paying any applicable article publishing charge ("APC") for Open Access articles. Where the Submitting Author wishes to make the Work available on an Open Access basis (and intends to pay the relevant APC), the terms of reuse of such Open Access shall be governed by a Creative Commons licence – details of these licences and which [Creative Commons](#) licence will apply to this Work are set out in our licence referred to above.

Other than as permitted in any relevant BMJ Author's Self Archiving Policies, I confirm this Work has not been accepted for publication elsewhere, is not being considered for publication elsewhere and does not duplicate material already published. I confirm all authors consent to publication of this Work and authorise the granting of this licence.

1  
2  
3  
4  
5  
6  
7  
8  
9  
10  
11  
12  
13  
14  
15  
16  
17  
18  
19  
20  
21  
22  
23  
24  
25  
26  
27  
28  
29  
30  
31  
32  
33  
34  
35  
36  
37  
38  
39  
40  
41  
42  
43  
44  
45  
46  
47  
48  
49  
50  
51  
52  
53  
54  
55  
56  
57  
58  
59  
60

**Cohort profile: Understanding Pregnancy Signals and Infant Development (UPSIDE), a pregnancy cohort study on prenatal exposure mechanisms for child health**

**Authors:** Thomas G. O'Connor, PhD<sup>1,2,3,4,8</sup>, Meghan Best, MPH<sup>4</sup>, Jessica Brunner<sup>1,4,6</sup>, Allison Avrich Ciesla, MS<sup>5</sup>, Allison Cuning, MA<sup>4</sup>, Ntemena Kapula<sup>4,6</sup>, Amber Kautz, MS, RDN<sup>5</sup>, Leena Khoury<sup>1,4</sup>, Allison Macomber<sup>4</sup>, Ying Meng, PhD, RN<sup>6</sup>; Richard K. Miller, PhD<sup>4</sup>; Hannah R. Murphy<sup>4</sup>; Carolyn Salafia, MD<sup>7</sup>; Ana Vallejo Sefair, MA<sup>8</sup>; Jishyra Serrano<sup>4</sup>, Emily S. Barrett, PhD<sup>4,5,9,10\*</sup>

13 1 Department of Psychiatry, University of Rochester School of Medicine and Dentistry,  
14 Rochester, NY, USA

15 2 Department of Neuroscience, University of Rochester School of Medicine and Dentistry,  
16 Rochester, NY, USA

17 3 Wynne Center for Family Research, University of Rochester School of Medicine and Dentistry,  
18 Rochester, NY, USA

19 4 Department of Obstetrics and Gynecology, University of Rochester School of Medicine and  
20 Dentistry, Rochester, NY, USA

21 5 Department of Public Health Sciences, University of Rochester School of Medicine and  
22 Dentistry, Rochester, NY, USA

23 6 University of Rochester School of Nursing, Rochester, NY, USA

24 7 Placental Analytics, Larchmont, USA

25 8 Department of Psychology, University of Rochester, Rochester, NY, USA

26 9 Department of Biostatistics and Epidemiology, Rutgers School of Public Health, Piscataway,  
27 NJ, USA

28 10 Environmental and Occupational Health Sciences Institute, Piscataway, NJ, USA

1  
2  
3 30 **\*Corresponding author:**  
4

5 31 Emily S. Barrett, PhD

6  
7 32 Rutgers School of Public Health

8  
9 33 Environmental and Occupational Health Sciences Institute

10  
11 34 170 Frelinghuysen Rd

12  
13 35 Piscataway, NJ 08854

14  
15 36 Telephone: 848-445-0197

16  
17 37 e-mail: [Emily.barrett@eohsi.rutgers.edu](mailto:Emily.barrett@eohsi.rutgers.edu)  
18  
19  
20  
21  
22  
23  
24  
25  
26  
27  
28  
29  
30  
31  
32  
33  
34  
35  
36  
37  
38  
39  
40  
41  
42  
43  
44  
45  
46  
47  
48  
49  
50  
51  
52  
53  
54  
55  
56  
57  
58  
59  
60

1  
2  
3 39 **ABSTRACT**

4 40 **Purpose:** Extensive research suggests that maternal prenatal distress is reliably related to  
5  
6 41 perinatal and child health outcomes – which may persist into adulthood. However, basic  
7  
8 42 questions remain regarding mechanisms involved. To better understand these mechanisms, we  
9  
10 43 developed the Understanding Pregnancy Signals and Infant Development (UPSIDE) cohort  
11  
12 44 study, which has several distinguishing features, including repeated assessments across  
13  
14 45 trimesters, analysis of multiple biological pathways of interest, and incorporation of placental  
15  
16 46 structure and function as mediators of child health outcomes.  
17  
18  
19

20 47  
21  
22 48 **Participants: Women with normal risk pregnancies** were recruited at <14 weeks gestation.  
23  
24 49 Study visits occurred in each trimester and included extensive psychological, socio-  
25  
26 50 demographic, health behavior, and biospecimen collection. Placenta and cord blood were  
27  
28 51 collected at birth. Child visits (ongoing) occur at birth and 1, 6, 12, 24, 36, and 48 months of age  
29  
30 52 and use standard anthropometric, clinical, behavioral, biological, and neuroimaging methods to  
31  
32 53 assess child physical and neurodevelopment.  
33  
34  
35

36 54  
37 55 **Findings to date:** We recruited 326 pregnancies; 294 (90%) were retained through birth.  
38  
39 56 Success rates for prenatal biospecimen collection were high across all trimesters (96-99% for  
40  
41 57 blood, 94-97% for urine, 96-99% for saliva, 96% of placentas, 88% for cord blood, and 93% for  
42  
43 58 buccal swab). Ninety-four percent of eligible babies (n=277) participated in a birth exam;  
44  
45 59 postnatal visits are ongoing.  
46  
47

48 60  
49 61 **Future plans:** The current phase of the study follows children through age 4 to examine child  
50  
51 62 neurodevelopment and physical development. In addition, the cohort participates in the National  
52  
53 63 Institutes of Health's Environmental influences on Child Health Outcomes (ECHO) program, a  
54  
55 64 national study of 50,000 families examining early environmental influences on perinatal  
56  
57

1  
2  
3 65 outcomes, neurodevelopment, obesity, and airway disease. Future research will leverage the  
4  
5 66 rich repository of biological samples and clinical data to expand research on the mechanisms of  
6  
7 67 child health outcomes in relation to environmental chemical exposures, genetics, and the  
8  
9 68 microbiome.  
10

11  
12 69

13  
14 70 **Strengths and Limitations:**

- 15  
16 71 • The UPSIDE cohort features intensive, serial biospecimen and questionnaire collection  
17  
18 72 from the first trimester of pregnancy through age 4 years that will allow us to test  
19  
20 73 hypotheses regarding the pathways by which maternal distress impacts children's  
21  
22 74 physical and neurodevelopment during critical and sensitive periods.  
23  
24 75 • Our comprehensive assessment of the placenta, including both morphometric and  
25  
26 76 molecular markers, provides novel data on the role that this under-studied organ plays  
27  
28 77 as a mediator of the association between maternal exposures and child outcomes.  
29  
30  
31 78 • The study is not designed to assess clinical phenotypes in pregnant women (e.g.,  
32  
33 79 preeclampsia) and children (e.g., autism)..  
34

35 80  
36  
37  
38  
39  
40  
41  
42  
43  
44  
45  
46  
47  
48  
49  
50  
51  
52  
53  
54  
55  
56  
57  
58  
59  
60



1  
2  
3 81 **INTRODUCTION:**  
4  
5 82

6  
7 83 For several decades, epidemiological studies have provided robust evidence of an association  
8  
9 84 between maternal prenatal distress and child health outcomes<sup>1-6</sup>. The large and growing  
10  
11 85 collection of studies that has emerged from both high-income and low/middle-income countries,  
12  
13 86 suggests that prenatal maternal distress is a plausible illustration of a “developmental  
14  
15 87 programming effect” on child health outcomes<sup>7-12</sup>. The developmental programming model  
16  
17 88 proposes that *in utero* exposures instigate an adaptive response in the fetus/child that is carried  
18  
19 89 forward in development and has persisting effects on behavior and biology<sup>13-18</sup>. Central to this  
20  
21 90 hypothesis is the concept that early exposures have a privileged – or different – effect on  
22  
23 91 biological systems than those occurring later in development<sup>19</sup>. In other words, when exposures  
24  
25 92 occur very early in development, physiology may change (either adaptively or pathologically)  
26  
27 93 resulting in long-lasting or permanent impacts on health and well-being. A classic example of  
28  
29 94 this is the “thrifty phenotype” whereby nutrient deprivation during prenatal development may  
30  
31 95 lead to reduced fetal growth and metabolic changes to conserve energy<sup>20</sup>. In the presence of  
32  
33 96 subsequent nutrient surplus (characteristic of the modern Western diet), this metabolic  
34  
35 97 conservation may lead to obesity and metabolic disease<sup>21</sup>. The resulting clinical and public  
36  
37 98 health implications of this model are substantial because they suggest that the timing of  
38  
39 99 intervention may be as important as its content. The aim of this paper is to introduce a new  
40  
41  
42  
43 100 cohort, Understanding Pregnancy Signals and Infant Development (UPSIDE), which includes  
44  
45 101 several measurement and design advantages to advance our understanding of maternal  
46  
47 102 prenatal psychosocial distress and child health outcomes.  
48

49 103  
50  
51 104 A key exposure variable in this large collection of studies may be broadly interpreted as prenatal  
52  
53 105 maternal psychological distress. Assessment of maternal psychological distress can derive from  
54  
55 106 many sources, including clinical interviews as well as maternal self-report inventories of anxiety,  
56  
57

1  
2  
3 107 depressive symptoms, trauma, major life-event stressors, and “pregnancy-specific” worry. The  
4  
5 108 persistence of reported impacts of maternal psychological distress on child outcomes, despite  
6  
7 109 variation in exposure measurement, suggests that the association is robust<sup>22-27</sup>. We adopt the  
8  
9 110 term “distress” when referring in general to this research and identify specific measures in the  
10  
11 111 research protocol that index this broader construct. The corollary – how maternal experience of  
12  
13 112 or exposure to distress creates an exposure variable for the fetus – is far less clear and likely  
14  
15 113 involves multiple, interdependent biological pathways. That is, if distress is indeed a causal  
16  
17 114 factor, it may operate via neuroendocrine, immune, autonomic, or other physiological  
18  
19 115 mechanisms<sup>28-31</sup>. Initial research on the mediating mechanisms, based on strong evidence from  
20  
21 116 experimental animal studies, targeted the hypothalamic-pituitary-adrenal (HPA) axis<sup>32</sup>. The  
22  
23 117 biological case for its involvement in the stress response (most typically in the form of cortisol,  
24  
25 118 the downstream product of HPA activation) is certain, its transplacental transfer is well-  
26  
27 119 established, and the application to placental mechanisms is evident (placental enzyme 11- $\beta$ -  
28  
29 120 HSD2)<sup>33-34</sup>. Nonetheless, that biological model is too limited. Human studies have not provided  
30  
31 121 consistent evidence that prenatal maternal distress impacts child development through HPA-  
32  
33 122 related mechanisms<sup>32-35-39</sup>. Moreover, several lines of research raise alternative mechanisms.  
34  
35 123 One of the most important of these is maternal inflammation, represented by research on the  
36  
37 124 Maternal Immune Activation (MIA) model. Research findings show that circulating  
38  
39 125 proinflammatory markers in pregnancy predict an increased risk of significant  
40  
41 126 neurodevelopmental problems in the child<sup>40-45</sup>. Other studies indicate that prenatal sex steroids  
42  
43 127 may also be a plausible predictor of child development<sup>46</sup> and may be confounded with stress  
44  
45 128 physiology<sup>47-50</sup>. Although many current and past pregnancy cohort studies have examined the  
46  
47 129 relationship between maternal psychosocial measures and child outcomes, few have gone  
48  
49 130 beyond the HPA axis to examine additional biological pathways. Accordingly, a first major  
50  
51 131 methodological and conceptual strength of the UPSIDE study is the assessment of biomarkers  
52  
53  
54  
55  
56  
57  
58  
59  
60

1  
2  
3 132 relevant to alternative pathways (e.g. cytokine profiles, steroidogenic activity) across pregnancy  
4  
5 133 and in multiple biological sample types (e.g. maternal blood, cord blood, placenta).  
6

7 134  
8  
9 135 A second key feature of the UPSIDE study is its focus on and intensive assessment of the  
10  
11 136 maternal-fetal-placenta unit. Despite the placenta's critical role in transmitting maternal signals  
12  
13 137 to the developing fetus, direct measurement of the placenta has been notably absent from the  
14  
15 138 vast majority of studies on prenatal distress and child development<sup>51-52</sup>. There are both practical  
16  
17 139 and scientific reasons for the limited research that integrates interrogation of the placenta in  
18  
19 140 studies of prenatal exposures and child outcomes. The practical matter concerns sample  
20  
21 141 collection and processing, particularly the 24/7 coverage that this requires if spontaneous  
22  
23 142 deliveries are included. Scientifically, there is variability among studies in which placental  
24  
25 143 markers are assessed; placenta weight, gene expression, and epigenetics have all received  
26  
27 144 some attention, almost always in separate reports. In this cohort study, we expand direct,  
28  
29 145 comprehensive measurement of the placenta to advance the field in several important ways.  
30  
31 146 First, it is increasingly clear that the placenta contributes to maternal perinatal health<sup>53-55</sup>, with  
32  
33 147 clear implications for neonatal and, by extension, child health. It is also becoming more widely  
34  
35 148 appreciated that prenatal exposures (including maternal distress but also environmental  
36  
37 149 exposures) may alter placenta structure and function<sup>56-58</sup>. Finally, there is now a growing  
38  
39 150 evidence base linking placenta measures to child outcomes such as obesity and  
40  
41 151 neurodevelopment<sup>59-61</sup>. What has been missing from this field are prospective pregnancy cohort  
42  
43 152 studies that track mother-child dyads from early gestation through early childhood and  
44  
45 153 incorporate placenta mechanisms. To that end, the UPSIDE study includes extensive  
46  
47 154 measurement of placenta structure and function from imaging, histology, and  
48  
49 155 immunohistochemistry, genetics, and pathology reports.  
50  
51  
52  
53  
54  
55  
56  
57  
58  
59  
60

1  
2  
3 157 In addition to these conceptual advances, UPSIDE includes several key design elements that  
4  
5 158 will inform our study of the multiple physiological pathways by which maternal psychological  
6  
7 159 stress may impact child development. These include: (1) serial maternal questionnaire and  
8  
9 160 biomarker data across all trimesters to examine critical and sensitive windows of gestation; (2)  
10  
11 161 pediatric visits at seven time points from birth to 4 years of age to assess neurodevelopment as  
12  
13 162 well as growth, reproductive development, and HPA axis activity; (3) consideration of potentially  
14  
15 163 important covariates and confounders that are sometimes overlooked in studies of child  
16  
17 164 development (e.g. maternal and child diet, physical activity, sleep).  
18  
19  
20 165

21  
22 166 *Primary aims:* UPSIDE is funded through several major research grants that have informed the  
23  
24 167 design of the study and included activities. The funding stream that started the cohort  
25  
26 168 (R01HD083369) had the over-arching goal of testing the hypothesis that prenatal maternal  
27  
28 169 anxiety programs sex steroid pathways leading to changes in placental structure and function,  
29  
30 170 and ultimately sex differences in physical, neurocognitive, and social behaviors in infancy  
31  
32 171 through 12 months of age. Soon after, additional study activities were funded through the NIH's  
33  
34 172 ECHO program the largest American study of early childhood health and development ever  
35  
36 173 undertaken, with up to 50,000 participating mother-child dyads from cohort studies around the  
37  
38 174 U.S. (UG3/UH3OD023349). The ECHO funding allowed us to expand the contributions of the  
39  
40 175 cohort to consider inflammatory mechanisms, extend child follow-up to age 4, and add a more  
41  
42 176 intensive battery of outcome measures. Additionally, as part of ECHO, data and biospecimens  
43  
44 177 from UPSIDE are harmonized with those of the other participating cohorts in order to address  
45  
46 178 ECHO-wide scientific priorities<sup>62</sup>. With multiple biological pathways of interest now considered in  
47  
48 179 UPSIDE, we are well poised to test competing hypotheses about the biological mechanisms by  
49  
50 180 which maternal distress impacts children's development. The broad Aims that guide research in  
51  
52 181 this cohort are described below.  
53  
54  
55  
56  
57  
58  
59  
60

- 182 1. Identify evidence of prenatal maternal distress-related alterations in HPA,  
183 inflammatory, and sex steroid hormone pathways in the placenta and cord blood.
- 184 2. Examine prenatal distress and sex steroid activity (in mother, placenta, and cord  
185 blood) in relation to sex-dependent physical and neurodevelopment.
- 186 3. Examine prenatal distress and inflammatory markers (in mother, placenta, cord  
187 blood, and infant) in relation to measures of neurodevelopment (neurocognitive and  
188 behavioral measurements, brain imaging, and EEG) and child physical development  
189 and adiposity (birth to age 4).

190

## 191 **COHORT DESCRIPTION:**

192

193 **Study setting and recruitment:** From December 2015-April 2019, women were recruited  
194 during their first trimester of pregnancy from outpatient obstetric clinics affiliated with the  
195 University of Rochester. Eligibility criteria included: <14 weeks gestation, age 18 or older,  
196 singleton pregnancy, no known substance abuse problems or a history of psychotic illness, and  
197 ability to communicate in English. Women with major endocrine disorders (such as polycystic  
198 ovary syndrome), high-risk pregnancies, or significant obstetric problems were excluded. Infants  
199 born prior to 37 weeks gestation were not included in postnatal study phases. No screening for  
200 distress was conducted prior to consent; instead we recruited from clinics who serve women at  
201 high psychosocial risk. Women who were recruited and delivered and then had a subsequent  
202 pregnancy during this time period were also invited to participate for the second pregnancy,  
203 towards the goal of examining intra-individual differences in prenatal maternal and placental  
204 biology as a future research direction. The study protocol was approved by the University of  
205 Rochester School of Medicine and Dentistry (URMC) Internal Review Board and Rutgers  
206 University. All participants provided informed consent.

207

1  
2  
3 208 **Patient and public involvement:** No patient involvement.  
4

5 209  
6  
7 210 **Overview of UPSIDE study activities:** Prenatal participation in UPSIDE consisted of face-to-  
8  
9 211 face visits in each trimester, including biospecimen collection and questionnaires. At birth, the  
10  
11 212 placenta and cord blood were collected, and the infant underwent a neonatal physical exam  
12  
13 213 prior to hospital discharge. Additional postnatal visits (ongoing) occur when children are 1, 6, 12,  
14  
15 214 24, 36, and 48 months of age and include biospecimen collection as well as observational and  
16  
17 215 performance-based assessments of the child; parents complete questionnaires on child and  
18  
19 216 family health and exposures. Child outcome timepoints were chosen based on consideration of  
20  
21 217 several key criteria: 1) developmental milestones and critical windows; 2) coincidence with  
22  
23 218 routine well-child appointments; 3) spacing of visits to allow for repeated measures within  
24  
25 219 domains over time, while minimizing participant burden and loss to follow-up; and 4) constraints  
26  
27 220 of funding timelines. In general, data collection for UPSIDE follows several key principles: (1)  
28  
29 221 repeated measures over time; (2) complementary biospecimen and questionnaire data  
30  
31 222 collection; (3) ability to test multiple/competing hypotheses. Biospecimen collection and study  
32  
33 223 activities are summarized in Tables 1 and 2, respectively, and described in greater detail below.  
34  
35 224

36  
37  
38 225 **Maternal survey measures:** At baseline, participants provided sociodemographic information;  
39  
40 226 time-sensitive data (e.g., employment, marital status) were updated at each study visit.  
41  
42 227 Additional measures relevant to psychological distress, psychosocial risk, and the biological  
43  
44 228 pathways of interest were collected during pregnancy as described below. To assess possible  
45  
46 229 timing effects of exposures as well as changes in maternal distress across pregnancy,  
47  
48 230 assessments were repeated in each trimester and, when applicable, at postnatal visits.  
49  
50

51  
52 231 **Key maternal distress measures.** Anxiety, our main measure of maternal distress, was  
53  
54 232 measured using the Penn State Worry Questionnaire (PSWQ)<sup>63</sup>. This 16-item self-report  
55  
56  
57  
58  
59  
60

1  
2  
3 233 instrument targets symptoms of worry (e.g., “my worries overwhelm me”) and has been  
4  
5 234 successfully used with this population in our previous work<sup>64</sup> and others’<sup>65</sup>. We included  
6  
7 235 measures of complementary constructs that capture other aspects of maternal distress that had  
8  
9 236 been used in previous studies. These included scales assessing pregnancy-specific anxiety<sup>3</sup>,  
10  
11 237 depression<sup>66</sup>, domestic abuse and violence<sup>67 68</sup>, global stress<sup>69</sup>, stressful life events<sup>22 70</sup>,  
12  
13 238 adverse childhood experiences (ACEs)<sup>71</sup>, discrimination<sup>72</sup>, aggression<sup>73</sup>, and neighborhood  
14  
15 239 stress<sup>74</sup>. To complement these measures of distress, we additionally assessed social support<sup>75</sup>  
16  
17 240 and relationship satisfaction<sup>76</sup>.

18  
19  
20  
21 241 **Covariates assessed by maternal surveys.** To complement the extensive maternal distress  
22  
23 242 measures described above, at prenatal visits mothers completed additional measures on related  
24  
25 243 to psychosocial stress and/or child neurodevelopment. These will be used as covariates in  
26  
27 244 models to address primary aims (where applicable) or in secondary data analyses. Specifically,  
28  
29 245 validated measures on physical activity<sup>77</sup>, sleep<sup>78</sup> and diet<sup>79 80 81</sup> were collected at multiple  
30  
31 246 timepoints pre- and postnatally. To assess maternal cognition, an important predictor of child  
32  
33 247 neurodevelopment, participants completed a mental rotation task<sup>82</sup> and an abbreviated Verbal  
34  
35 248 Comprehension subtest of the Wechsler Adult Intelligence Scale IV (WAIS-IV)<sup>83</sup>.

36  
37  
38 249 **Prenatal maternal biospecimen collection and analysis.** UPSIDE collected extensive  
39  
40 250 maternal biospecimens as described below and in Table 1. In addition to the specific analyses  
41  
42 251 described, for all sample types, additional aliquots were banked for future research. **Blood.** In  
43  
44 252 each trimester, a 40mL blood sample was collected and processed to provide aliquots of serum,  
45  
46 253 plasma, cells, and whole blood (3<sup>rd</sup> trimester only) for a variety of analyses. Ongoing analysis of  
47  
48 254 these samples includes (1) sex steroid hormones (estrone, estradiol, estriol, testosterone, and  
49  
50 255 free testosterone) using liquid chromatography with tandem mass spectrometry (LC-MS/MS)<sup>84</sup>;  
51  
52 256 (2) placental corticotropin releasing hormone using radioimmunoassay<sup>85</sup>; (3) immune and  
53  
54 257 related markers [e.g. high sensitivity cytokines, C-reactive protein (CRP), TGF-beta, angiogenic  
55  
56  
57  
58  
59  
60



1  
2  
3 258 markers, and Mullerian inhibiting factor (MIF)]. Maternal blood was collected by labor and  
4  
5 259 delivery nursing staff upon admission for delivery for additional assessment of immune markers.  
6  
7 260 Saliva. Participants were trained to collect diurnal saliva for cortisol measurement using the  
8  
9 261 standard passive drool procedures developed by the MacArthur Research Network on  
10  
11 262 Socioeconomic Status and Health<sup>86</sup>. Samples (approximately 1 mL) were collected at home at  
12  
13 263 five pre-determined points across the day (at wake-up, 45 minutes after wake-up, 2.5 hours  
14  
15 264 after wake-up, 8 hours after wake-up, 12 hours after wake-up) on a single day in each trimester  
16  
17 265 (for a total of 5 samples per trimester or 15 samples across the pregnancy). An additional  
18  
19 266 passive drool saliva sample was collected by mothers at face-to-face visits and will be used to  
20  
21 267 assess the oral microbiome. Urine. At each prenatal visit, a urine sample was collected, after  
22  
23 268 which the specific gravity (dilution) and temperature of the sample were measured using a  
24  
25 269 handheld refractometer (National Instrument Company, Inc., USA). Five mL were frozen for  
26  
27 270 future use. Buccal swab. In the third trimester, a buccal cell sample for DNA analysis was  
28  
29 271 collected by swabbing the inside of the participant's cheek (MAWI iSWAB, 250 series) after  
30  
31 272 which samples were stored according to manufacturer guidelines. Vaginal swab. In the third  
32  
33 273 trimester, when a vaginal swab was taken by the provider to test for the presence of  
34  
35 274 Streptococcus B as part of standard obstetric care, an additional swab was collected for future  
36  
37 275 analysis of the vaginal microbiome.  
38  
39  
40  
41 276

42  
43 277 **Birth biospecimen collection and analysis.** Samples were collected at the time of delivery  
44  
45 278 (usually within 1 hour) and banked at -80°C. Analyses including hormone and immune assays,  
46  
47 279 environmental chemical assessments, and genetics are ongoing.  
48  
49  
50 280

51 281 Cord bloods. Cord bloods were collected in two venues: (1) mixed cord bloods (up to 25mL)  
52  
53 282 from the delivery room by delivery staff; and (2) fetal arterial and venous bloods (up to 30mL  
54  
55 283 each) drawn from the placental vasculature by trained coordinators immediately following  
56  
57



1  
2  
3 284 delivery. The bloods collected from the cord, umbilical vein, and umbilical artery were placed  
4  
5 285 into additive free tubes, K2-EDTA tubes, and sodium heparin tubes, depending on the volume  
6  
7 286 collected. Peripheral blood mononuclear cells (PBMCs) extracted using Ficoll-Paque and red  
8  
9 287 blood cells (RBCs) reserved from processing cord bloods were stored in liquid nitrogen.  
10

11 288  
12  
13 289 **Placental tissue collection.** Fresh core villous tissue was collected by a trained coordinator  
14  
15 290 using a flap technique to leave the maternal decidua surface intact. For RNA analysis, two  
16  
17 291 50mg tissue sections were washed in phosphate buffered saline, placed in cryovials, and flash  
18  
19 292 frozen in liquid nitrogen. About 30g of additional placental tissue was extracted using the same  
20  
21 293 technique and frozen unwashed in liquid nitrogen for other types of analyses.  
22  
23

24 294  
25  
26 295 **Placental pathology.** All placentae underwent a detailed pathology examination that included  
27  
28 296 standard gross and histologic protocols as well as novel assessment of placental  
29  
30 297 vascularization patterns on the chorionic plate. Using a standard digital camera with polarizing  
31  
32 298 filters, a trained coordinator took a series of 2D photographs of the fresh tissue prior to core  
33  
34 299 villous specimen sampling. From the 2D photographs, fetal vascular data will be extracted,  
35  
36 300 arterial and venous surface vascular networks mapped, and virtual slices created. Chorionic  
37  
38 301 surface vasculature branching will be further analyzed using computer extraction techniques,  
39  
40 302 yielding continuous measures including number of branch generations, number of branches off  
41  
42 303 base of cord, number of branch points in network, and mean distance from end of artery to end  
43  
44 304 of nearest vein.  
45

46 305  
47  
48 306 Additional photos were taken after removal of the placental specimens to indicate locations of  
49  
50 307 the collections. Weight was collected after removal of the cord and membranes using a  
51  
52 308 standard scale, and cord length was measured (to the nearest 0.1cm) using a tape measure.  
53  
54 309 Cord twists were counted to measure the twist index. Biopsies of the cord were taken at the  
55  
56  
57

1  
2  
3 310 insertion site and 10cm from the insertion site, then placed in cassettes. A section of membrane  
4  
5 311 was cut into a square and rolled, then placed in a cassette. Placentae were reviewed by a  
6  
7 312 pathologist to assess for histology, anomalies, and infections. All tissues were placed into  
8  
9 313 formalin for fixation for at least 72 hours. After fixation, the placentae were sectioned and  
10  
11 314 images were obtained of each section. Biopsies of tissue from four quadrants, plus any  
12  
13 315 additional abnormal tissues that were noted, were collected into cassettes for further analysis.  
14  
15  
16 316 The remaining tissues were retained for future assessments.  
17

18 317  
19  
20 318 **3D placental imaging.** Three dimensional digital scans of all placentae were collected to  
21  
22 319 assess placental morphology. The custom-built scanner consisted of two webcams mounted on  
23  
24 320 a bar providing binocular view, and a turntable on which the placenta was placed. The scanner  
25  
26 321 took 8 images of the top and bottom of the placenta and the software assembled these resulting  
27  
28 322 16 images into a 3-D shape. Morphometric measures obtained from 3D images include  
29  
30 323 estimated volume, surface area, thickness, shape, and symmetric difference.  
31  
32

33 324  
34  
35 325 **Prenatal and Birth Record Abstraction.** Clinical data was abstracted from the URM C eRecord  
36  
37 326 system. Prenatal record abstraction included medical, surgical, gynecological, and reproductive  
38  
39 327 history, prenatal visit records, ultrasound measurements, and clinical lab values. Delivery chart  
40  
41 328 abstraction included admission date and time, gestational age on admission, labor onset and  
42  
43 329 duration, rupture of membranes, highest intrapartum temperature, group B streptococcus status,  
44  
45 330 maternal white blood cells, delivery date and time, fetal position and mode of delivery,  
46  
47 331 complications, medications, and maternal morbidity. In addition, relevant data from newborn  
48  
49 332 nursery records were abstracted including birth weight and length, head circumference, APGAR  
50  
51 333 scores, admission unit for baby, first recorded temperature, first recorded blood glucose, Kaiser  
52  
53 334 sepsis risk score, cord arterial pH, neonatal resuscitation, and neonatal complications.  
54  
55

56 335  
57

1  
2  
3 336 **Child study activities (ongoing).** Child visits occur at birth as well as 1, 6, 12, 24, 36, and 48  
4  
5 337 months of age. Consistent with the study emphasis on longitudinal measures over time, many  
6  
7 338 assessments are repeated at multiple time points, as age appropriate. At present, all birth and 1  
8  
9 339 month visits have been completed, whereas 6, 12, 24, and 36 month visits are ongoing, and 48  
10  
11 340 month visits will start in early 2021. Here we provide an overview of the child data collected  
12  
13 341 across all of these timepoints by domain of interest. Activities conducted are displayed by visit  
14  
15 342 timepoint in Table 2. Our primary child outcome measures represent two domains:  
16  
17 343 neurodevelopment and growth. Secondly, we collect data on additional constructs as required  
18  
19 344 for ECHO-wide projects and/or to use as covariates in analyses.  
20  
21  
22 345

23  
24 346 **Neurodevelopment.** Given the focus on neurodevelopment as a primary outcome, UPSIDE  
25  
26 347 study children participate in an extensive battery of neurodevelopmental assessments that span  
27  
28 348 constructs and method (e.g., cognition and language, temperament and behavior, sex-  
29  
30 349 dependent neurodevelopment, eating behaviors, and neuroimaging) (Table 2). Importantly,  
31  
32 350 although practice effects sometimes occur in older children when measures are closely spaced  
33  
34 351 (i.e. several weeks apart), this is unlikely to occur in children this young with visits spaced many  
35  
36 352 months or years apart.  
37  
38  
39 353

40  
41 354 **Cognition and language.** The Bayley Scales of Infant Development-III (BSID-III), a widely used  
42  
43 355 tool for assessing mental and motor development in infants and toddlers, is administered at 6,  
44  
45 356 12, and 24 months<sup>87</sup>. Of primary interest are the Cognitive scaled-score and the Language  
46  
47 357 scaled-score, including both receptive and expressive communication subtests which assess  
48  
49 358 memory, sensorimotor development, preverbal behaviors and communication and vocabulary  
50  
51 359 development. At 24 months, complementary data on early vocabulary are obtained through the  
52  
53 360 MacArthur-Bates Communicative Development Inventory: Words and Gestures which asks  
54  
55 361 parents to mark on a checklist which phrases, words, and sound effects their child understands,  
56  
57  
58  
59  
60

1  
2  
3 362 says, or signs<sup>88</sup>. Executive Function is assessed at 24 and 36 months using age-appropriate  
4  
5 363 standardized tasks that evaluate the child's working memory ("Spin the Pots"), impulse control  
6  
7 364 ("Snack Delay"), and inhibitory control ("Reverse Categorization")<sup>89-91</sup>. At 36 and 48 months we  
8  
9 365 administer additional tasks from the NIH ToolBox Early Childhood Cognition Battery including:  
10  
11 366 Flanker Inhibitory Control and Attention Test (executive function and attention), Dimensional  
12  
13 367 Change Card Sort Test (cognitive flexibility), Picture Sequence Memory (episodic memory), and  
14  
15 368 Picture Vocabulary Test (language development)<sup>92-95</sup>. Finally, at age 4 years, the Wechsler  
16  
17 369 Preschool and Primary Scale of Intelligence (WPPSI-IV) is administered to facilitate calculation  
18  
19  
20 370 of verbal, performance and full scale IQ<sup>96</sup>.

21  
22  
23 371 Temperament and behavior. The Laboratory Temperament Assessment Battery (Lab-TAB) is  
24  
25 372 an observational tool for examining multiple dimensions of infant temperament<sup>97</sup>. We administer  
26  
27 373 Lab-TAB fear tasks involving the presentation of an unpredictable mechanical toy (6, 12, and 24  
28  
29 374 months) and a remote-controlled spider (12 and 24 months). In the Anger/Frustration task (6  
30  
31 375 and 12 months), the infant is allowed to engage with a novel toy and is subsequently interrupted  
32  
33 376 by gentle arm restraint. At 6, 12, and 24 months, mothers complete the Infant Behavior  
34  
35 377 Questionnaire – revised (IBQ-R), a 191-item questionnaire on infant temperament that assesses  
36  
37 378 14 different dimensions (Approach, Vocal Reactivity, High Intensity Pleasure, Smile and  
38  
39 379 Laughter, Activity Level, Perceptual Sensitivity, Sadness, Distress to Limitations, Fear, Falling  
40  
41 380 Reactivity, Low Intensity Pleasure, Cuddliness, Duration of Orienting, Soothability, Social Fear,  
42  
43 381 Attentional Shifting)<sup>98</sup>. At 12 months we also administer the Strange Situation Procedure, widely  
44  
45 382 used to assess parent-infant attachment relationships<sup>99 100</sup>.

46  
47  
48  
49  
50 383 Sex-dependent neurodevelopment. To address study aims regarding sex steroid pathways and  
51  
52 384 the potentially sex-dependent impacts of maternal distress, we administer a series of  
53  
54 385 specialized tasks that, in previous research, have demonstrated sex differences even in early  
55  
56  
57  
58  
59  
60

1  
2  
3 386 infancy. At 1 and 6 months, infants engage in a task assessing preferences for faces <sup>101</sup>. At 6,  
4  
5 387 12, and 24 months, children complete a series of computer-based tasks assessing preferences  
6  
7 388 for sex-stereotypical toys (e.g. doll versus toy truck) and social stimuli <sup>102 103</sup>. A computerized  
8  
9 389 mental rotation task developed for use in infants is administered at 6, 12, 24, and 36 months<sup>104</sup>.  
10  
11 390 Finally at 12 and 24 months, the child engages in an independent play task designed to assess  
12  
13 391 preferences for stereotypically female, male, and gender neutral toys<sup>105</sup>.  
14  
15

16 392  
17  
18 393 Eating behaviors. Of relevance to both neurodevelopment and physical development, eating  
19  
20 394 behaviors are assessed using multiple questionnaires and observational tasks at the child's 36-  
21  
22 395 month visit. The Children's Eating Behavior Questionnaire, Preschool Adapted Liking Survey,  
23  
24 396 and Comprehensive Feeding Practices Questionnaire are completed by the parent to indicate  
25  
26 397 the child's eating behaviors and parental influences, such as food responsiveness, emotional  
27  
28 398 overeating, food preference, food restriction, and family food environment <sup>106-108</sup>. Food  
29  
30 399 reinforcement is an observational task used to examine the reinforcing value of food in children,  
31  
32 400 which indicates motivation to eat <sup>109</sup>. A food ranking task was developed to evaluate the child's  
33  
34 401 ability to indicate his/her food preference by ranking pictures of food items. To complement the  
35  
36 402 eating behavior tasks and provide information on the child's usual dietary intake, at the 36-  
37  
38 403 month visit, the parent completes 24-hour dietary recalls for the child (similar to the one  
39  
40 404 completed by mothers during pregnancy).  
41  
42

43 405  
44  
45 406 Neuroimaging. At 1 month of age, magnetic resonance imaging (MRI) was collected on a  
46  
47 407 Siemens Prisma with a 32 channel head coil using a standard protocol that assesses  
48  
49 408 anatomical scans, Diffusion Tensor Imaging, and Resting State Functional Connectivity. MRI is  
50  
51 409 conducted while the infant was in natural sleep. A follow-up MRI will be performed at age 4,  
52  
53 410 which will also include functional assessments. When the child is 24 and 36 months, a  
54  
55 411 electroencephalogram (EEG) assessment is conducted. In the EEG, select stimuli are  
56  
57

1  
2  
3 412 presented and the brain's measured response, known as event-related potentials (ERP), is  
4  
5 413 recorded. Our stimulus is an auditory event-related potential, called mismatch negativity (MMN).  
6  
7 414 In the MMN assessment, repetitive sounds are interrupted by an occasional odd sound, that  
8  
9 415 differs in frequency and duration.  
10

11 416  
12  
13 417 **Physical development.** At each visit, child anthropometric measurements are collected by  
14  
15 418 trained research coordinators. In general, measurements are collected in duplicate at each time  
16  
17 419 point, with a third measurement obtained when the first two differ by more than a pre-specified  
18  
19 420 amount (which varied by specific measure and age). Weight, length, and head circumference  
20  
21 421 are measured at every postnatal visit using standard protocols<sup>110</sup>. Weight (to the nearest  
22  
23 422 0.01kg) is measured using a Seca Infant Scale (Model #334). Length (to the nearest 0.1cm) is  
24  
25 423 measured using a Seca Infantometer (Model#416), tape measure, or wall-mounted stadiometer  
26  
27 424 (depending on age). Head circumference is measured by placing a tape measure just above  
28  
29 425 eyebrows and wrapping it around the widest part of the head. Skinfold thicknesses (suprailiac,  
30  
31 426 subscapular, and tricep) are obtained to the nearest 0.1 mm using calibrated Holtain calipers <sup>110</sup>  
32  
33 427 <sup>111</sup>. From birth to 24 months, anogenital distance, a marker of prenatal androgen exposure, is  
34  
35 428 measured to the nearest 0.1 mm using dial Vernier calipers<sup>112</sup>. A second purported measure of  
36  
37 429 prenatal androgen exposure, second to fourth digit ratio (2D:4D) of the child's right hand is  
38  
39 430 measured to the nearest 0.1 mm at 36 and 48 months also using dial Vernier calipers<sup>113</sup>. Finally,  
40  
41 431 at 36 and 48 months, waist circumference is measured to the nearest 0.1 cm by wrapping a  
42  
43 432 tape measure around the body at the level of the umbilicus<sup>110</sup>.  
44  
45  
46  
47  
48  
49

50 434 **Child biospecimen collection.** Postnatal biospecimen collection occurs at each child visit  
51  
52 435 (Table 1). Analysis of immune and HPA axis markers is ongoing, whereas additional analysis of  
53  
54 436 banked biospecimens is pending. **Rectal swab.** At birth as well as 1, 6, 12, and 24 months, a  
55  
56 437 sterile swab applicator is dipped into sterile phosphate buffered saline, inserted into the child's  
57  
58  
59  
60

1  
2  
3 438 anal orifice up to the floxed portion of the swab, and stored in a conical tube for future  
4  
5 439 microbiome analyses<sup>114</sup>. Buccal swab. At birth, 12, 24, and 48 months, a buccal specimen is  
6  
7 440 collected for genetic analysis at least 60 minutes after the last recorded feeding. Both cheeks  
8  
9 441 are swabbed using a Mawi iSWAB collection kit (250 series) and the vial is stored according to  
10  
11 442 manufacturer guidelines. Saliva. At 6, 12, 24, and 48 months, saliva is collected to measure  
12  
13 443 cortisol using Salimetrics SalivaBio swabs. To assess cortisol response to a stressor (blood  
14  
15 444 draw at 6 months, strange situation task at 12 months, physical exam at 24 months) a series of  
16  
17 445 swabs are collected: at the start of the visit (6 and 24 months only), pre-stressor, 15 minutes  
18  
19 446 post-stressor, and 30 minutes post-stressor. At 24 and 48 months, an additional saliva swab is  
20  
21 447 collected for assessment of the oral microbiome. Stool. At 1 and 6 months, a stool sample is  
22  
23 448 collected at study visits using standard protocols (or by parents using an at-home collection kit if  
24  
25 449 sample collection at the visit is not possible). Urine. Urine is collected at the 1, 6, and 12 month  
26  
27 450 visits using an Earth's Best chlorine free diaper equipped with either a urine collection bag  
28  
29 451 and/or sterile cotton balls. Blood. At 6, 12, and 48 months, approximately 10mL of blood is  
30  
31 452 collected by a pediatric nurse (4 mL in a K2-EDTA tube and 3 mL in each of 2 sodium heparin  
32  
33 453 tubes at 6 and 12 months, 8mL into a sodium heparin tube, 2mL into a K2-EDTA tube, and 3mL  
34  
35 454 into a tube without additives at 48 months). Nails. At 12, 24, and 36 months, fingernails and  
36  
37 455 toenails are collected at study visits (or by parents using an at-home collection kit). Breastmilk.  
38  
39 456 Mothers who are breastfeeding at 1 and 6 months provide a breastmilk sample (up to 45mL).  
40  
41 457 Mothers collect the sample during the visit (when possible) using a new, sterile Harmony  
42  
43 458 Medela manual breast pump. When that is not possible, mothers bring in a breastmilk sample  
44  
45 459 that was collected at home.  
46  
47  
48  
49  
50

51 461 **Statistical analysis and power calculations.** Complementary analyses are planned to  
52  
53 462 address the aims of the UPSIDE cohort. In general, we will employ longitudinal models to test  
54  
55 463 key hypotheses, examining the mediated routes by which associations may occur. We  
56  
57  
58  
59  
60



1  
2  
3 464 anticipate fitting regression models to determine associations between maternal exposures and  
4  
5 465 child outcomes and will use structural equation modelling to examine potential mediators.  
6  
7 466 Covariates will differ by the particular analyses of interest and will be included based on a priori  
8  
9 467 knowledge and/or a LASSO approach depending on the particular analysis.  
10

11 468  
12  
13 469 Power calculations were informed by results from our prior cohort studies and indicated that the  
14  
15 470 study would be appropriately powered with a sample size of approximately 290 mother-child  
16  
17 471 dyads. These original power calculations were designed to address hypotheses related to sex  
18  
19 472 steroid pathways, as those were the first set of funded Aims at the time of cohort establishment.  
20  
21 473 For example, with an anticipated correlation of 0.19, we would have 90% power to detect a  
22  
23 474 significant slope in the regression of maternal anxiety (PSWQ scores) on concentrations of  
24  
25 475 estradiol, an estrogen of primarily placental origin. For our hypothesis on PSWQ scores in relation  
26  
27 476 to anogenital distance (a marker of prenatal sex steroid activity), with an estimated correlation of  
28  
29 477 0.25 between maternal PSWQ scores and girls' AGD, we would have 81% power to detect a  
30  
31 478 slope  $\neq 0$  and 86% power to detect a sex-anxiety interaction (with boys' slope = -0.13). Retention  
32  
33 479 of 226 children at age 12 months would provide 89% power to detect an association between  
34  
35 480 maternal PSWQ scores and play behavior in girls, with weaker or no associations expected in  
36  
37 481 boys. These power calculations are provided as illustrative analyses with the recognition that  
38  
39 482 there will be variation in power based on the particular question under consideration.  
40  
41 483 Additionally, for some highly novel analyses (e.g. maternal serial inflammatory markers in  
42  
43 484 relation to child MRI data), unfortunately there is a lack of effect size data on which to power the  
44  
45 485 study.  
46  
47  
48  
49  
50 486



487

488 **FINDINGS TO DATE:**

489 In total, 312 women were recruited into the study, of whom 14 enrolled for more than one  
490 pregnancy, resulting in a total of 326 study pregnancies (Table 3; Figure 1). Of these, 294  
491 mothers gave birth to an infant in the study. The 32 women who signed informed consent but  
492 did not give birth to a study infant included 3 screen failures, 5 pregnancy losses, 8 who became  
493 ineligible during pregnancy, 2 who were lost to follow up, and 14 who chose to withdraw. Here  
494 we report on the mothers who gave birth to an infant in the study.

495

496 On average, women were  $28.9 \pm 4.7$  years old at recruitment and the majority were White  
497 (61.2%) or Black (25.5%), with 9.9% reporting Hispanic ethnicity. The participants were  
498 socioeconomically diverse with a 34.2% having a high school degree or less, while 25.7% had  
499 obtained a post-college degree. At the time of recruitment 74.9% were employed and 60.3%  
500 were married or living as married. Self-reported alcohol use and smoking during early  
501 pregnancy were both relatively uncommon (3.4% and 7.8%, respectively).

502

503 The cohort was mildly psychosocially risk enriched and overall symptoms were stable across  
504 trimesters with ICC's for the various psychosocial scales ranging from 0.68-0.80 (Table 4). At  
505 baseline, over 50% were characterized as moderate or high anxiety (based on PSWQ scores)  
506 There was a small increase in average EPDS (depression) scores across pregnancy, however  
507 the proportion of women scoring  $\geq 13$  (the most stringent clinical cut-off indicating possible  
508 depression) was stable across pregnancy (9.5-10.6% across trimesters). Women typically  
509 worried less about their fetuses after the first trimester, with slight increases in worry about  
510 delivery over time. In the third trimester, 67.9% of women reported at least one ACE, with 16.7%  
511 reporting four or more. Similarly, the average number of stressful life events during pregnancy  
512 was relatively low ( $2.46 \pm 2.80$ ), however there was great inter-individual variation such that

1  
2  
3 513 some women reported up to 17 events. By design, this was a low-medical risk cohort at  
4  
5 514 recruitment therefore relatively few participants had major pregnancy complications including  
6  
7 515 hypertensive disorders of pregnancy (n=22, 7.5%) and gestational diabetes (n=6; 2.0%). The  
8  
9 516 average gestational age at birth was 39.5 weeks and only 14 (4.7%) babies were born preterm.  
10

11 517  
12  
13 518 Success rates for biospecimen collection were consistently high across trimesters (blood: 95-  
14  
15 519 99%; urine 94-97%; saliva 96-100%). In addition, 272 mothers (93%) provided a buccal swab  
16  
17 520 for DNA analysis and 258 mothers (75%) provided a vaginal swab. At birth, the placenta and  
18  
19 521 cord blood were obtained in 96% and 88% of women, respectively. The discrepancy between  
20  
21 522 success in cord blood collection and placenta collection results from the more intensive  
22  
23 523 immediate processing required for the former as even short delays can result in draining or  
24  
25 524 clotting, making collection impossible. Finally, 277 infants (94%) participated in an exam at birth;  
26  
27 525 of these 271 (98%) provided a buccal swab and a rectal swab (for microbial analysis) was  
28  
29 526 obtained on 261 (94%). One-month visits were recently completed with additional postnatal  
30  
31 527 visits at 6, 12, 24, 36, and 48 months underway.  
32  
33  
34

35 528

### 36 529 **STRENGTHS AND LIMITATIONS:**

37  
38  
39 530 There are several notable strengths of the UPSIDE study. The first is our extensive, rigorous  
40  
41 531 biospecimen collection starting in the first trimester and continuing throughout pregnancy. This  
42  
43 532 was made possible by focusing recruitment and prenatal visits primarily at a small set of  
44  
45 533 obstetric clinics located in close proximity to the labs where processing and storage occurs.  
46  
47 534 Similarly, birth biospecimen collection (placenta and cord blood) is a strength and based on our  
48  
49 535 experience, a large “SWAT” team is needed for around the clock collection and processing of  
50  
51 536 placentae within 3 hours after birth (ideally within 1 hour). The need for a 24/7 dedicated on call  
52  
53 537 team is further illustrated by the fact that the majority of study births occurred outside of  
54  
55 538 business hours (Figure 2). Similarly, we implemented multiple mechanisms to identify when  
56  
57  
58  
59  
60

1  
2  
3 539 study participants were admitted for delivery. The successful strategies discussed above  
4  
5 540 allowed UPSIDE to acquire 96% of placentae. Our extensive placental assessments and  
6  
7 541 biorepository will provide exceptionally rich data on both morphology and molecular biology,  
8  
9 542 allowing us to address novel questions about the placenta in relation to maternal exposures and  
10  
11 543 child outcomes.  
12

13  
14 544  
15  
16 545 Another strength of the study is our ongoing intensive longitudinal follow-up of mother-child  
17  
18 546 dyads with a focus on repeated measures to assess intra-individual changes over time. In the  
19  
20 547 prenatal period, for example, our extensive phenotyping of mothers occurred at three time  
21  
22 548 points, which will allow us to look at trimester-specific impacts and to potentially differentiate  
23  
24 549 between different domains of psychosocial distress (e.g. anxiety, depression, stressful life  
25  
26 550 events). During the postnatal period, we again adopt this model, with seven visits occurring from  
27  
28 551 birth to age 4. This intensive visit schedule allows us to assess domains of neurodevelopment  
29  
30 552 (as age-appropriate) over time and facilitates serial collection of relevant biospecimens that may  
31  
32 553 yield mechanistic insights. Our use of standard measures of development and cognition (such  
33  
34 554 as the WPPSI and BSID-III), moreover, is complemented by tools developed to examine more  
35  
36 555 specific aspects of development that are plausibly linked to our pathways of interest (e.g. social  
37  
38 556 preferences and sex-typical play behavior in relation to sex steroids).  
39  
40

41 557  
42  
43 558 At the same time, there are several limitations of note. The deliberate recruitment of low-medical  
44  
45 559 risk pregnancies means that we are underpowered to test hypotheses regarding pregnancy  
46  
47 560 complications or outcomes. Similarly, our relatively small sample size and overall healthy  
48  
49 561 population precludes examining pediatric clinical outcomes such as birth defects, autism  
50  
51 562 spectrum disorders or developmental delays; however, our ability to look at continuous  
52  
53 563 measures of development will yield insights into neurodevelopmental variation within the typical  
54  
55 564 spectrum. In addition, given evidence that preterm infants develop along a very different  
56  
57

1  
2  
3 565 trajectory than term infants, preterm infants were not included in postnatal follow-up, so we  
4  
5 566 cannot look at outcomes in this special group. Finally, although the biological and psychosocial  
6  
7 567 contributions of partners is of great interest and relevance to children's development, our prior  
8  
9 568 work in this population suggested that partner attendance at visits was likely to be low, making  
10  
11 569 consent and data collection quite difficult. Thus like many pregnancy cohorts, our data on  
12  
13 570 partners is limited to information provided by the participating women.  
14  
15

16 571

### 17 18 572 **COLLABORATION:**

19  
20 573 Interested investigators may contact the PIs (EB, TO'C) in writing regarding potential  
21  
22 574 collaborations involving data and/or biospecimens from the UPSIDE study. Potential  
23  
24 575 collaborators will be asked to write a concept proposal for their proposed analysis which will be  
25  
26 576 reviewed by the UPSIDE Executive Committee. After concept proposal approval, collaborators  
27  
28 577 will submit analysis plans and proof of IRB approval to the Executive Committee prior to  
29  
30 578 receiving data/samples. Requests for collaborations will be considered on an ongoing basis;  
31  
32 579 however, in general, external collaborations will be started once the primary study aims have  
33  
34 580 been addressed.  
35  
36

37 581

### 38 39 582 **FUTURE DIRECTIONS:**

40  
41 583 As data are cleaned and final outcome data become available, our highest priority is to address  
42  
43 584 the primary study aims for the multiple projects that support this cohort. Beyond our current  
44  
45 585 aims, the rich biospecimen collection and intensive phenotyping of the UPSIDE cohort lends  
46  
47 586 itself to a wide range of ancillary studies and future directions. At present, ancillary studies to  
48  
49 587 examine environmental chemicals (synthetic chemicals and metals) and air pollution in relation  
50  
51 588 to placental function, perinatal outcomes, and infant development are in progress. Also  
52  
53 589 underway is a complementary study of participating mothers looking at trajectories of  
54  
55 590 cardiometabolic health from early pregnancy through three years postpartum. Additional studies  
56  
57

1  
2  
3 591 are planned to examine the microbiome (vaginal, oral, gut, and breastmilk) in relation to various  
4  
5 592 endpoints including pediatric oral health and neurodevelopment. As part of the ECHO  
6  
7 593 consortium, data and biospecimens from our cohort are harmonized with up to 50,000 other  
8  
9 594 participating mother-child dyads from cohort studies around the U.S. with the goal of providing  
10  
11 595 novel insights into factors that shape multiple facets of children's health (including pre-, peri-,  
12  
13 596 and postnatal outcomes, upper and lower airway health, obesity, neurodevelopment, and  
14  
15 597 positive health).  
16  
17  
18 598

19  
20 599 **Author affiliations.** All authors (with the exception of CS) are affiliated with the University of  
21  
22 600 Rochester School of Medicine and Dentistry. The senior author (EB) also holds an appointment  
23  
24 601 at Rutgers School of Public Health. CS's primary affiliation is Placental Analytics.  
25  
26 602

27  
28 603 **Collaborators.** UPSIDE study collaborators include: Jennifer Adibi, Lauren Aleksunes, Mary  
29  
30 604 Caserta, Susan Groth, Philip Katzman, Eva Pressman, Xing Qiu, Zorimar Rivera-Nunez, Kristin  
31  
32 605 Scheible, Ruchit Shah, Lorelei Thornburg, and Sally Thurston.  
33  
34 606

35  
36  
37 607 **Contributorship statement.** Emily Barrett and Tom O'Connor designed the study with  
38  
39 608 significant conceptual contributions to specific portions from Richard K. Miller, Carolyn Salafia,  
40  
41 609 and Ying Meng. Jessica Brunner, Anna Vallejo Sefair, Allison Avrich Ciesla, Allison Cunning,  
42  
43 610 Ntemena Kapula, Meghan Best, Jishyra Serrano, Hannah Murphy, Leena Khoury, Allison  
44  
45 611 Macomber, and Amber Kautz led data acquisition. Emily Barrett and Tom O'Connor led  
46  
47 612 manuscript development with intellectual content for subsections provided by all co-authors. All  
48  
49 613 authors provided final approval for the version to be published and agree to be accountable for  
50  
51 614 all aspects of the work.  
52  
53 615

1  
2  
3 616 **Acknowledgments.** We acknowledge the contributions of Jessica Alawi-Dugovic, Sanjukta  
4  
5 617 Bandyopadhyay, Jennifer Carnahan, Srihari Chari, Jennifer Dutra, Simone Greenberg, Katie  
6  
7 618 Helbig, Maia Homsy, Zoe Irving, Dan Kaplan, Nate Laniewski, Anne Mientkiewicz, Jessica  
8  
9 619 Mitchell, Aurora Newman, Lisa Panisch, Ryan Prawel, Jenelle Putzig, Amanda Rubano, Andrew  
10  
11 620 Shay, Meghan Sheahan, David Skroll, Jiatong Sui, Sophia Turbide, Meghana Vulapalli, Bailey  
12  
13 621 Walters, Gloria Wink, and Zidian Xie. We also acknowledge the mothers and babies who  
14  
15 622 participate in UPSIDE.  
16  
17  
18 623

19  
20 624 **Funding.** Funding for the UPSIDE-ECHO study is provided by Eunice Kennedy Shriver National  
21  
22 625 Institute of Child Health and Human Development (R01HD083369), NIH Office of the Director  
23  
24 626 grants (UG3OD023349; UH3OD023349), National Institute of Environmental Health Sciences  
25  
26 627 (R01ES029275, R01ES029275-02S1, R01ES029336), National Institute of Nursing Research  
27  
28 628 (R01NR01760203, K23NR019014), and the Mae Stone Goode Foundation (no grant number).  
29  
30 629 Additional support is provided by the National Institute of Environmental Health Sciences  
31  
32 630 (P30ES005022, P30ES001247), National Center for Advancing Translational Sciences  
33  
34 631 (TL1TR000096), and the Wynne Center for Family Research (no grant number).  
35  
36  
37 632

38  
39 633 **Competing interests.** None declared.  
40  
41 634

42  
43 635 **Patient consent for publication.** Not required.  
44  
45 636

46  
47 637 **Ethics approval.** This study was approved by the University of Rochester School of Medicine  
48  
49 638 and Dentistry Institutional Review Board (#58456) and the Rutgers University Institutional  
50  
51 639 Review Board (PRO20160001514).  
52  
53 640

54  
55  
56 641 **Provenance and peer review.** Not commissioned; externally peer reviewed.  
57  
58  
59  
60

1  
2  
3  
4  
5  
6  
7  
8  
9  
10  
11  
12  
13  
14  
15  
16  
17  
18  
19  
20  
21  
22  
23  
24  
25  
26  
27  
28  
29  
30  
31  
32  
33  
34  
35  
36  
37  
38  
39  
40  
41  
42  
43  
44  
45  
46  
47  
48  
49  
50  
51  
52  
53  
54  
55  
56  
57  
58  
59  
60

642  
643  
644  
645  
646

**Data availability statement.** Once complete cohort data has been collected and cleaned, it will be available pending approved concept proposal, analysis plan, and documentation of IRB approval.

For peer review only



1  
2  
3 647  
4 648 **Works cited**  
5 649  
6 650  
7 651

- 8 652 1. O'Connor TG, Heron J, Golding J, et al. Maternal antenatal anxiety and children's  
9 653 behavioural/emotional problems at 4 years. Report from the Avon Longitudinal Study of Parents  
10 654 and Children. *Br J Psychiatry* 2002;180:502-8. [published Online First: 2002/06/04]  
11 655 2. Buss C, Davis EP, Hobel CJ, et al. Maternal pregnancy-specific anxiety is associated with child executive  
12 656 function at 6-9 years age. *Stress* 2011;14(6):665-76. doi: 10.3109/10253890.2011.623250  
13 657 [published Online First: 2011/10/15]  
14 658 3. Huizink AC, Robles de Medina PG, Mulder EJ, et al. Stress during pregnancy is associated with  
15 659 developmental outcome in infancy. *J Child Psychol Psychiatry* 2003;44(6):810-8. doi:  
16 660 10.1111/1469-7610.00166 [published Online First: 2003/09/10]  
17 661 4. O'Connor TG, Heron J, Glover V. Antenatal anxiety predicts child behavioral/emotional problems  
18 662 independently of postnatal depression. *J Am Acad Child Adolesc Psychiatry* 2002;41(12):1470-7.  
19 663 doi: 10.1097/00004583-200212000-00019 [published Online First: 2002/11/26]  
20 664 5. Talge NM, Neal C, Glover V. Antenatal maternal stress and long-term effects on child  
21 665 neurodevelopment: how and why? *J Child Psychol Psychiatry* 2007;48(3-4):245-61. doi:  
22 666 10.1111/j.1469-7610.2006.01714.x [published Online First: 2007/03/16]  
23 667 6. Welberg LA, Seckl JR. Prenatal stress, glucocorticoids and the programming of the brain. *J*  
24 668 *Neuroendocrinol* 2001;13(2):113-28. doi: 10.1046/j.1365-2826.2001.00601.x [published Online  
25 669 First: 2001/02/13]  
26 670 7. Buffa G, Dahan S, Sinclair I, et al. Prenatal stress and child development: A scoping review of research  
27 671 in low- and middle-income countries. *PLoS One* 2018;13(12):e0207235. doi:  
28 672 10.1371/journal.pone.0207235 [published Online First: 2018/12/29]  
29 673 8. Ramchandani PG, Richter LM, Norris SA, et al. Maternal prenatal stress and later child behavioral  
30 674 problems in an urban South African setting. *J Am Acad Child Adolesc Psychiatry* 2010;49(3):239-  
31 675 47. [published Online First: 2010/04/23]  
32 676 9. MacGinty RP, Kariuki SM, Barnett W, et al. Associations of antenatal maternal psychological distress  
33 677 with infant birth and development outcomes: Results from a South African birth cohort. *Compr*  
34 678 *Psychiatry* 2020;96:152128. doi: 10.1016/j.comppsy.2019.152128 [published Online First:  
35 679 2019/11/13]  
36 680 10. Herba CM, Glover V, Ramchandani PG, et al. Maternal depression and mental health in early  
37 681 childhood: an examination of underlying mechanisms in low-income and middle-income  
38 682 countries. *Lancet Psychiatry* 2016;3(10):983-92. doi: 10.1016/s2215-0366(16)30148-1 [published  
39 683 Online First: 2016/09/22]  
40 684 11. Hentges RF, Graham SA, Plamondon A, et al. A Developmental Cascade from Prenatal Stress to Child  
41 685 Internalizing and Externalizing Problems. *J Pediatr Psychol* 2019;44(9):1057-67. doi:  
42 686 10.1093/jpepsy/jsz044 [published Online First: 2019/06/06]  
43 687 12. O'Donnell KJ, Glover V, Lahti J, et al. Maternal prenatal anxiety and child COMT genotype predict  
44 688 working memory and symptoms of ADHD. *PLoS One* 2017;12(6):e0177506. doi:  
45 689 10.1371/journal.pone.0177506 [published Online First: 2017/06/15]  
46 690 13. Barker DJ. Fetal origins of coronary heart disease. *Br Heart J* 1993;69(3):195-6. [published Online  
47 691 First: 1993/03/01]  
48 692 14. Barker DJ. The fetal origins of coronary heart disease. *European heart journal* 1997;18(6):883-4.  
49 693 [published Online First: 1997/06/01]  
50 694 15. Hales CN, Barker DJ. Type 2 (non-insulin-dependent) diabetes mellitus: the thrifty phenotype  
51 hypothesis. *Diabetologia* 1992;35(7):595-601. [published Online First: 1992/07/01]  
52  
53  
54  
55  
56  
57  
58  
59  
60



- 1  
2  
3 695 16. Jones A, Osmond C, Godfrey KM, et al. Evidence for developmental programming of cerebral  
4 696 laterality in humans. *PLoS One* 2011;6(2):e17071. doi: 10.1371/journal.pone.0017071 [published  
5 697 Online First: 2011/03/02]  
6  
7 698 17. Godfrey KM, Gluckman PD, Hanson MA. Developmental origins of metabolic disease: life course and  
8 699 intergenerational perspectives. *Trends Endocrinol Metab* 2010;21(4):199-205. doi:  
9 700 10.1016/j.tem.2009.12.008 [published Online First: 2010/01/19]  
10 701 18. Hanson M, Gluckman P. Developmental origins of noncommunicable disease: population and public  
11 702 health implications. *Am J Clin Nutr* 2011;94(6 Suppl):1754s-58s. doi: 10.3945/ajcn.110.001206  
12 703 [published Online First: 2011/04/29]  
13 704 19. Gluckman P, Hanson M. The Fetal Matrix: Evolution, development, and disease. Cambridge, UK:  
14 705 Cambridge University Press 2005.  
15 706 20. Hales CN, Barker DJ. The thrifty phenotype hypothesis. *Br Med Bull* 2001;60:5-20. doi:  
16 707 10.1093/bmb/60.1.5 [published Online First: 2002/01/26]  
17 708 21. Hoffman DJ, Powell TL, Barrett ES, et al. Developmental Origins of Metabolic Disease. *Physiol Rev*  
18 709 2020 doi: 10.1152/physrev.00002.2020 [published Online First: 2020/12/04]  
19 710 22. Bergman K, Sarkar P, O'Connor TG, et al. Maternal stress during pregnancy predicts cognitive ability  
20 711 and fearfulness in infancy. *J Am Acad Child Adolesc Psychiatry* 2007;46(11):1454-63. doi:  
21 712 10.1097/chi.0b013e31814a62f6 [published Online First: 2007/12/01]  
22 713 23. Buitelaar JK, Huizink AC, Mulder EJ, et al. Prenatal stress and cognitive development and  
23 714 temperament in infants. *Neurobiol Aging* 2003;24 Suppl 1:S53-60; discussion S67-8. doi:  
24 715 10.1016/s0197-4580(03)00050-2 [published Online First: 2003/06/28]  
25 716 24. DiPietro JA, Hilton SC, Hawkins M, et al. Maternal stress and affect influence fetal neurobehavioral  
26 717 development. *Dev Psychol* 2002;38(5):659-68. [published Online First: 2002/09/11]  
27 718 25. Lobel M, Dunkel-Schetter C, Scrimshaw SC. Prenatal maternal stress and prematurity: a prospective  
28 719 study of socioeconomically disadvantaged women. *Health Psychol* 1992;11(1):32-40. doi:  
29 720 10.1037//0278-6133.11.1.32 [published Online First: 1992/01/01]  
30 721 26. O'Connor TG, Heron J, Golding J, et al. Maternal antenatal anxiety and behavioural/emotional  
31 722 problems in children: a test of a programming hypothesis. *J Child Psychol Psychiatry*  
32 723 2003;44(7):1025-36. doi: 10.1111/1469-7610.00187 [published Online First: 2003/10/09]  
33 724 27. Stapleton LR, Schetter CD, Westling E, et al. Perceived partner support in pregnancy predicts lower  
34 725 maternal and infant distress. *J Fam Psychol* 2012;26(3):453-63. doi: 10.1037/a0028332  
35 726 [published Online First: 2012/06/06]  
36 727 28. Beijers R, Buitelaar JK, de Weerth C. Mechanisms underlying the effects of prenatal psychosocial  
37 728 stress on child outcomes: beyond the HPA axis. *Eur Child Adolesc Psychiatry* 2014;23(10):943-56.  
38 729 doi: 10.1007/s00787-014-0566-3 [published Online First: 2014/05/31]  
39 730 29. Gao Y, Huang Y, Li X. Interaction between prenatal maternal stress and autonomic arousal in  
40 731 predicting conduct problems and psychopathic traits in children. *J Psychopathol Behav Assess*  
41 732 2017;39(1):1-14. doi: 10.1007/s10862-016-9556-8 [published Online First: 2017/03/14]  
42 733 30. Hantsoo L, Kornfield S, Anguera MC, et al. Inflammation: A Proposed Intermediary  
43 734 Between Maternal Stress and Offspring Neuropsychiatric Risk. *Biol Psychiatry* 2019;85(2):97-  
44 735 106. doi: 10.1016/j.biopsych.2018.08.018 [published Online First: 2018/10/14]  
45 736 31. Hechler C, Borewicz K, Beijers R, et al. Association between Psychosocial Stress and Fecal Microbiota  
46 737 in Pregnant Women. *Sci Rep* 2019;9(1):4463. doi: 10.1038/s41598-019-40434-8 [published  
47 738 Online First: 2019/03/16]  
48 739 32. Thayer ZM, Wilson MA, Kim AW, et al. Impact of prenatal stress on offspring glucocorticoid levels: A  
49 740 phylogenetic meta-analysis across 14 vertebrate species. *Sci Rep* 2018;8(1):4942. doi:  
50 741 10.1038/s41598-018-23169-w [published Online First: 2018/03/23]  
51  
52  
53  
54  
55  
56  
57  
58  
59  
60

- 1  
2  
3 742 33. O'Donnell KJ, Bugge Jensen A, Freeman L, et al. Maternal prenatal anxiety and downregulation of  
4 743 placental 11 $\beta$ -HSD2. *Psychoneuroendocrinology* 2012;37(6):818-26. doi:  
5 744 10.1016/j.psyneuen.2011.09.014 [published Online First: 2011/10/18]  
6 745 34. Seth S, Lewis AJ, Saffery R, et al. Maternal Prenatal Mental Health and Placental 11 $\beta$ -HSD2 Gene  
7 746 Expression: Initial Findings from the Mercy Pregnancy and Emotional Wellbeing Study. *Int J Mol*  
8 747 *Sci* 2015;16(11):27482-96. doi: 10.3390/ijms161126034 [published Online First: 2015/11/26]  
9 748 35. Kivlighan KT, DiPietro JA, Costigan KA, et al. Diurnal rhythm of cortisol during late pregnancy:  
10 749 associations with maternal psychological well-being and fetal growth.  
11 750 *Psychoneuroendocrinology* 2008;33(9):1225-35. doi: 10.1016/j.psyneuen.2008.06.008  
12 751 [published Online First: 2008/08/12]  
13 752 36. Niknazar S, Nahavandi A, Najafi R, et al. Parents' adulthood stress induces behavioral and hormonal  
14 753 alterations in male rat offspring. *Behav Brain Res* 2013;252:136-43. doi:  
15 754 10.1016/j.bbr.2013.05.026 [published Online First: 2013/05/30]  
16 755 37. O'Keane V, Lightman S, Marsh M, et al. Increased pituitary-adrenal activation and shortened  
17 756 gestation in a sample of depressed pregnant women: a pilot study. *J Affect Disord* 2011;130(1-  
18 757 2):300-5. doi: 10.1016/j.jad.2010.10.004 [published Online First: 2010/11/26]  
19 758 38. Obel C, Hedegaard M, Henriksen TB, et al. Stress and salivary cortisol during pregnancy.  
20 759 *Psychoneuroendocrinology* 2005;30(7):647-56. doi: 10.1016/j.psyneuen.2004.11.006 [published  
21 760 Online First: 2005/04/28]  
22 761 39. Suglia SF, Staudenmayer J, Cohen S, et al. Cumulative Stress and Cortisol Disruption among Black and  
23 762 Hispanic Pregnant Women in an Urban Cohort. *Psychol Trauma* 2010;2(4):326-34. doi:  
24 763 10.1037/a0018953 [published Online First: 2011/03/23]  
25 764 40. Malkova NV, Yu CZ, Hsiao EY, et al. Maternal immune activation yields offspring displaying mouse  
26 765 versions of the three core symptoms of autism. *Brain, behavior, and immunity* 2012;26(4):607-  
27 766 16. doi: 10.1016/j.bbi.2012.01.011 [published Online First: 2012/02/09]  
28 767 41. Monje ML, Toda H, Palmer TD. Inflammatory blockade restores adult hippocampal neurogenesis.  
29 768 *Science* 2003;302(5651):1760-5. doi: 10.1126/science.1088417 [published Online First:  
30 769 2003/11/15]  
31 770 42. Short SJ, Lubach GR, Karasin AI, et al. Maternal influenza infection during pregnancy impacts  
32 771 postnatal brain development in the rhesus monkey. *Biological psychiatry* 2010;67(10):965-73.  
33 772 doi: 10.1016/j.biopsych.2009.11.026 [published Online First: 2010/01/19]  
34 773 43. Allswede DM, Yolken RH, Buka SL, et al. Cytokine concentrations throughout pregnancy and risk for  
35 774 psychosis in adult offspring: a longitudinal case-control study. *Lancet Psychiatry* 2020;7(3):254-  
36 775 61. doi: 10.1016/s2215-0366(20)30006-7 [published Online First: 2020/02/09]  
37 776 44. Brown AS, Begg MD, Gravenstein S, et al. Serologic evidence of prenatal influenza in the etiology of  
38 777 schizophrenia. *Arch Gen Psychiatry* 2004;61(8):774-80. doi: 10.1001/archpsyc.61.8.774  
39 778 [published Online First: 2004/08/04]  
40 779 45. Zerbo O, Iosif AM, Walker C, et al. Is maternal influenza or fever during pregnancy associated with  
41 780 autism or developmental delays? Results from the CHARGE (Childhood Autism Risks from  
42 781 Genetics and Environment) study. *J Autism Dev Disord* 2013;43(1):25-33. doi: 10.1007/s10803-  
43 782 012-1540-x [published Online First: 2012/05/09]  
44 783 46. Day DB, Collett BR, Barrett ES, et al. Prenatal sex hormones and behavioral outcomes in children.  
45 784 *Psychoneuroendocrinology* 2020;113:104547. doi: 10.1016/j.psyneuen.2019.104547 [published  
46 785 Online First: 2020/01/07]  
47 786 47. Brüggemann M, Licht O, Fetter É, et al. Knotting nets: Molecular junctions of interconnecting  
48 787 endocrine axes identified by application of the adverse outcome pathway concept. *Environ*  
49 788 *Toxicol Chem* 2018;37(2):318-28. doi: 10.1002/etc.3995 [published Online First: 2017/10/07]

- 1  
2  
3 789 48. Izvol'skaia MS, Tillet Y, Sharova VS, et al. Disruptions in the hypothalamic-pituitary-gonadal axis in rat  
4 790 offspring following prenatal maternal exposure to lipopolysaccharide. *Stress* 2016;19(2):198-  
5 791 205. doi: 10.3109/10253890.2016.1149695 [published Online First: 2016/03/05]  
6 792 49. Nguyen TV, Jones SL, Elgbeili G, et al. Testosterone-cortisol dissociation in children exposed to  
7 793 prenatal maternal stress, and relationship with aggression: Project Ice Storm. *Dev Psychopathol*  
8 794 2018;30(3):981-94. doi: 10.1017/s0954579418000652 [published Online First: 2018/08/03]  
9 795 50. Sarkar P, Bergman K, Fisk NM, et al. Amniotic fluid testosterone: relationship with cortisol and  
10 796 gestational age. *Clin Endocrinol (Oxf)* 2007;67(5):743-7. doi: 10.1111/j.1365-2265.2007.02955.x  
11 797 [published Online First: 2007/07/20]  
12 798 51. Jansson T, Powell TL. Role of the placenta in fetal programming: underlying mechanisms and  
13 799 potential interventional approaches. *Clin Sci (Lond)* 2007;113(1):1-13. doi: 10.1042/cs20060339  
14 800 [published Online First: 2007/06/01]  
15 801 52. Thornburg KL, Marshall N. The placenta is the center of the chronic disease universe. *Am J Obstet*  
16 802 *Gynecol* 2015;213(4 Suppl):S14-20. doi: 10.1016/j.ajog.2015.08.030 [published Online First:  
17 803 2015/10/03]  
18 804 53. Chambers JC, Fusi L, Malik IS, et al. Association of maternal endothelial dysfunction with  
19 805 preeclampsia. *Jama* 2001;285(12):1607-12. doi: 10.1001/jama.285.12.1607 [published Online  
20 806 First: 2001/04/13]  
21 807 54. Ray JG, Vermeulen MJ, Schull MJ, et al. Cardiovascular health after maternal placental syndromes  
22 808 (CHAMPS): population-based retrospective cohort study. *Lancet* 2005;366(9499):1797-803. doi:  
23 809 10.1016/s0140-6736(05)67726-4 [published Online First: 2005/11/22]  
24 810 55. Seely EW, Tsigas E, Rich-Edwards JW. Preeclampsia and future cardiovascular disease in women:  
25 811 How good are the data and how can we manage our patients? *Semin Perinatol* 2015;39(4):276-  
26 812 83. doi: 10.1053/j.semperi.2015.05.006 [published Online First: 2015/06/29]  
27 813 56. Li Q, Kappil MA, Li A, et al. Exploring the associations between microRNA expression profiles and  
28 814 environmental pollutants in human placenta from the National Children's Study (NCS).  
29 815 *Epigenetics* 2015;10(9):793-802. doi: 10.1080/15592294.2015.1066960 [published Online First:  
30 816 2015/08/08]  
31 817 57. Tegethoff M, Greene N, Olsen J, et al. Maternal psychosocial stress during pregnancy and placenta  
32 818 weight: evidence from a national cohort study. *PLoS One* 2010;5(12):e14478. doi:  
33 819 10.1371/journal.pone.0014478 [published Online First: 2011/01/11]  
34 820 58. Yang C, Song G, Lim W. A mechanism for the effect of endocrine disrupting chemicals on  
35 821 placentation. *Chemosphere* 2019;231:326-36. doi: 10.1016/j.chemosphere.2019.05.133  
36 822 [published Online First: 2019/05/28]  
37 823 59. Park BY, Misra DP, Moye J, et al. Placental gross shape differences in a high autism risk cohort and  
38 824 the general population. *PLoS One* 2018;13(8):e0191276. doi: 10.1371/journal.pone.0191276  
39 825 [published Online First: 2018/08/23]  
40 826 60. Chang JM, Zeng H, Han R, et al. Autism risk classification using placental chorionic surface vascular  
41 827 network features. *BMC Med Inform Decis Mak* 2017;17(1):162. doi: 10.1186/s12911-017-0564-8  
42 828 [published Online First: 2017/12/08]  
43 829 61. Misra DP, Salafia CM, Charles AK, et al. Placental measurements associated with intelligence  
44 830 quotient at age 7 years. *J Dev Orig Health Dis* 2012;3(3):190-7. doi:  
45 831 10.1017/s2040174412000141 [published Online First: 2012/06/01]  
46 832 62. NIH. Environmental Influences on Child Health Outcomes (ECHO) Program: NIH; 2021 [Available  
47 833 from: [https://www.nih.gov/research-training/environmental-influences-child-health-outcomes-  
48 834 echo-program](https://www.nih.gov/research-training/environmental-influences-child-health-outcomes-echo-program) accessed January 31 2021.

- 1  
2  
3 835 63. Meyer TJ, Miller ML, Metzger RL, et al. Development and validation of the Penn State Worry  
4 836 Questionnaire. *Behav Res Ther* 1990;28(6):487-95. doi: 10.1016/0005-7967(90)90135-6  
5 837 [published Online First: 1990/01/01]  
6 838 64. O'Connor TG, Scheible K, Sefair AV, et al. Immune and neuroendocrine correlates of temperament in  
7 839 infancy. *Dev Psychopathol* 2017;29(5):1589-600. doi: 10.1017/s0954579417001250 [published  
8 840 Online First: 2017/11/23]  
9 841 65. Goodman JH, Guarino A, Chenausky K, et al. CALM Pregnancy: results of a pilot study of mindfulness-  
10 842 based cognitive therapy for perinatal anxiety. *Arch Womens Ment Health* 2014;17(5):373-87.  
11 843 doi: 10.1007/s00737-013-0402-7 [published Online First: 2014/01/23]  
12 844 66. Cox JL, Holden JM, Sagovsky R. Detection of postnatal depression. Development of the 10-item  
13 845 Edinburgh Postnatal Depression Scale. *Br J Psychiatry* 1987;150:782-6. doi:  
14 846 10.1192/bjp.150.6.782 [published Online First: 1987/06/01]  
15 847 67. McFarlane J, Parker B, Soeken K, et al. Assessing for abuse during pregnancy. Severity and frequency  
16 848 of injuries and associated entry into prenatal care. *Jama* 1992;267(23):3176-8. doi:  
17 849 10.1001/jama.267.23.3176 [published Online First: 1992/06/17]  
18 850 68. Robertson Blackmore E, Mittal M, Cai X, et al. Lifetime Exposure to Intimate Partner Violence and  
19 851 Proinflammatory Cytokine Levels Across the Perinatal Period. *J Womens Health (Larchmt)*  
20 852 2016;25(10):1004-13. doi: 10.1089/jwh.2015.5261 [published Online First: 2016/10/18]  
21 853 69. Cohen S, Kamarack T, Mermelstein R. A Global Measure of Perceived Stress. *Journal of Health and*  
22 854 *Social Behavior* 1983;24:385-96.  
23 855 70. Barnett BE, Hanna B, Parker G. Life event scales for obstetric groups. *J Psychosom Res*  
24 856 1983;27(4):313-20. doi: 10.1016/0022-3999(83)90054-5 [published Online First: 1983/01/01]  
25 857 71. Felitti VJ, Anda RF, Nordenberg D, et al. Relationship of childhood abuse and household dysfunction  
26 858 to many of the leading causes of death in adults. The Adverse Childhood Experiences (ACE)  
27 859 Study. *Am J Prev Med* 1998;14(4):245-58. doi: 10.1016/s0749-3797(98)00017-8 [published  
28 860 Online First: 1998/06/23]  
29 861 72. Krieger N, Smith K, Naishadham D, et al. Experiences of discrimination: validity and reliability of a  
30 862 self-report measure for population health research on racism and health. *Soc Sci Med*  
31 863 2005;61(7):1576-96. doi: 10.1016/j.socscimed.2005.03.006 [published Online First: 2005/07/12]  
32 864 73. Buss AH, Perry M. The aggression questionnaire. *J Pers Soc Psychol* 1992;63(3):452-9. doi:  
33 865 10.1037//0022-3514.63.3.452 [published Online First: 1992/09/01]  
34 866 74. Ewart CK, Suchday S. Discovering how urban poverty and violence affect health: development and  
35 867 validation of a Neighborhood Stress Index. *Health Psychol* 2002;21(3):254-62. doi:  
36 868 10.1037//0278-6133.21.3.254 [published Online First: 2002/05/25]  
37 869 75. Cohen S, Mermelstein R, Kamarck T, et al. Measuring the functional components of social support.  
38 870 In: Sarason I, Sarason B, eds. Social support: Theory, research, and application. The Hague, The  
39 871 Netherlands: Martinus Nijhoff 1985:73-94.  
40 872 76. Funk JL, Rogge RD. Testing the ruler with item response theory: increasing precision of measurement  
41 873 for relationship satisfaction with the Couples Satisfaction Index. *J Fam Psychol* 2007;21(4):572-  
42 874 83. doi: 10.1037/0893-3200.21.4.572 [published Online First: 2008/01/09]  
43 875 77. Chasan-Taber L, Schmidt MD, Roberts DE, et al. Development and validation of a Pregnancy Physical  
44 876 Activity Questionnaire. *Med Sci Sports Exerc* 2004;36(10):1750-60. doi:  
45 877 10.1249/01.mss.0000142303.49306.0d [published Online First: 2004/12/15]  
46 878 78. Buysse DJ, Reynolds CF, 3rd, Monk TH, et al. The Pittsburgh Sleep Quality Index: a new instrument  
47 879 for psychiatric practice and research. *Psychiatry Res* 1989;28(2):193-213. doi: 10.1016/0165-  
48 880 1781(89)90047-4 [published Online First: 1989/05/01]  
49 881 79. Johnson RK, Driscoll P, Goran MI. Comparison of multiple-pass 24-hour recall estimates of energy  
50 882 intake with total energy expenditure determined by the doubly labeled water method in young  
51  
52  
53  
54  
55  
56  
57  
58  
59  
60



- 1  
2  
3 883 children. *J Am Diet Assoc* 1996;96(11):1140-4. doi: 10.1016/s0002-8223(96)00293-3 [published  
4 884 Online First: 1996/11/01]
- 5 885 80. Feskanich D, Sielaff BH, Chong K, et al. Computerized collection and analysis of dietary intake  
6 886 information. *Comput Methods Programs Biomed* 1989;30(1):47-57. doi: 10.1016/0169-  
7 887 2607(89)90122-3 [published Online First: 1989/09/01]
- 8 888 81. Tooze JA, Midthune D, Dodd KW, et al. A new statistical method for estimating the usual intake of  
9 889 episodically consumed foods with application to their distribution. *J Am Diet Assoc*  
10 890 2006;106(10):1575-87. doi: 10.1016/j.jada.2006.07.003 [published Online First: 2006/09/27]
- 11 891 82. Peters M, Laeng B, Latham K, et al. A redrawn Vandenberg and Kuse mental rotations test: different  
12 892 versions and factors that affect performance. *Brain Cogn* 1995;28(1):39-58. doi:  
13 893 10.1006/brcg.1995.1032 [published Online First: 1995/06/01]
- 14 894 83. Drozdick L, Wahlstrom D, Zhu J, et al. The Wechsler Adult Intelligence Scale—Fourth Edition and the  
15 895 Wechsler Memory Scale—Fourth Edition. In: Flanagan D, Harrison P, eds. Contemporary  
16 896 intellectual assessment: Theories, tests, and issues: Guilford Press 2012:197-223.
- 17 897 84. Barrett ES, Mbowe O, Thurston SW, et al. Predictors of Steroid Hormone Concentrations in Early  
18 898 Pregnancy: Results from a Multi-Center Cohort. *Matern Child Health J* 2019;23(3):397-407. doi:  
19 899 10.1007/s10995-018-02705-0 [published Online First: 2019/01/20]
- 20 900 85. Smith R, Smith JI, Shen X, et al. Patterns of plasma corticotropin-releasing hormone, progesterone,  
21 901 estradiol, and estriol change and the onset of human labor. *J Clin Endocrinol Metab*  
22 902 2009;94(6):2066-74. doi: 10.1210/jc.2008-2257 [published Online First: 2009/03/05]
- 23 903 86. Stewart J, Seeman T. Salivary Cortisol Measurement MacArthur Research Network on SES and  
24 904 Health2000 [Available from: <https://macses.ucsf.edu/research/allostatic/salivarycort.php>  
25 905 accessed August 27 2020.
- 26 906 87. Bayley N. Bayley Scales of infant and toddler development: administration manual. San Antonio, TX:  
27 907 Harcourt Assessment 2006.
- 28 908 88. Fenson L, Marchman V, Thal D, et al. MacArthur-Bates Communicative Development Inventories:  
29 909 User's Guide and Technical Manual (2nd edition)2007.
- 30 910 89. Hughes C, Ensor R. Executive function and theory of mind in 2 year olds: a family affair? *Dev*  
31 911 *Neuropsychol* 2005;28(2):645-68. doi: 10.1207/s15326942dn2802\_5 [published Online First:  
32 912 2005/09/08]
- 33 913 90. Kochanska G, Murray KT, Harlan ET. Effortful control in early childhood: continuity and change,  
34 914 antecedents, and implications for social development. *Dev Psychol* 2000;36(2):220-32.  
35 915 [published Online First: 2000/04/05]
- 36 916 91. Executive Function Scale for Preschoolers Test Manual. Minneapolis, MN: Institute of Child  
37 917 Development, University of Minnesota.
- 38 918 92. Weintraub S, Bauer PJ, Zelazo PD, et al. I. NIH Toolbox Cognition Battery (CB): introduction and  
39 919 pediatric data. *Monogr Soc Res Child Dev* 2013;78(4):1-15. doi: 10.1111/mono.12031 [published  
40 920 Online First: 2013/08/21]
- 41 921 93. Zelazo PD, Anderson JE, Richler J, et al. II. NIH Toolbox Cognition Battery (CB): measuring executive  
42 922 function and attention. *Monogr Soc Res Child Dev* 2013;78(4):16-33. doi: 10.1111/mono.12032  
43 923 [published Online First: 2013/08/21]
- 44 924 94. Bauer PJ, Dikmen SS, Heaton RK, et al. III. NIH Toolbox Cognition Battery (CB): measuring episodic  
45 925 memory. *Monogr Soc Res Child Dev* 2013;78(4):34-48. doi: 10.1111/mono.12033 [published  
46 926 Online First: 2013/08/21]
- 47 927 95. Gershon RC, Slotkin J, Manly JJ, et al. IV. NIH Toolbox Cognition Battery (CB): measuring language  
48 928 (vocabulary comprehension and reading decoding). *Monogr Soc Res Child Dev* 2013;78(4):49-69.  
49 929 doi: 10.1111/mono.12034 [published Online First: 2013/08/21]

- 1  
2  
3 930 96. Weschler D. Wechsler Preschool and Primary Scale of Intelligence. 4th ed. Bloomington, IL: Pearson  
4 931 2012.
- 5 932 97. Goldsmith H, Rothbart M. The Laboratory Temperament Assessment Battery, Locomotor Version.  
6 933 3.1 ed. Madison, WI: University of Wisconsin- Madison 1999.
- 7 934 98. Gartstein M, Rothbart M. Studying infant temperament via the Revised Infant Behavior  
8 935 Questionnaire. *Infant Behavior & Development* 2003;26(1):64-86.
- 9 936 99. Ainsworth MD, Bell SM. Attachment, exploration, and separation: illustrated by the behavior of one-  
10 937 year-olds in a strange situation. *Child Dev* 1970;41(1):49-67. [published Online First:  
11 938 1970/03/01]
- 12 939 100. Ainsworth MD, Blehar M, Waters E, et al. Patterns of attachment: a psychological study of the  
13 940 Strange Situation. Hillsdale, NJ: Lawrence Erlbaum 1978.
- 14 941 101. Connellan J, Baron-Cohen S, Wheelwright S, et al. Sex differences in human neonatal social  
15 942 perception. *Infant Behavior & Development* 2000;23:113-18.
- 16 943 102. Alexander GM, Wilcox T, Woods R. Sex differences in infants' visual interest in toys. *Arch Sex Behav*  
17 944 2009;38(3):427-33. doi: 10.1007/s10508-008-9430-1 [published Online First: 2008/11/20]
- 18 945 103. Lutchmaya S, Baron-Cohen S. Human Sex Differences in Social and Non-Social Looking Preferences  
19 946 at 12 months of age. *Infant Behavior & Development* 2002;25:319-25.
- 20 947 104. Moore DS, Johnson SP. Mental Rotation of Dynamic, Three-Dimensional Stimuli by 3-Month-Old  
21 948 Infants. *Infancy* 2011;16(4):435-45. doi: 10.1111/j.1532-7078.2010.00058.x [published Online  
22 949 First: 2011/07/01]
- 23 950 105. Lamminmäki A, Hines M, Kuiri-Hänninen T, et al. Testosterone measured in infancy predicts  
24 951 subsequent sex-typed behavior in boys and in girls. *Horm Behav* 2012;61(4):611-6. doi:  
25 952 10.1016/j.yhbeh.2012.02.013 [published Online First: 2012/03/01]
- 26 953 106. Wardle J, Guthrie CA, Sanderson S, et al. Development of the Children's Eating Behaviour  
27 954 Questionnaire. *J Child Psychol Psychiatry* 2001;42(7):963-70. doi: 10.1111/1469-7610.00792  
28 955 [published Online First: 2001/11/06]
- 29 956 107. Peracchio HL, Henebery KE, Sharafi M, et al. Otitis media exposure associates with dietary  
30 957 preference and adiposity: a community-based observational study of at-risk preschoolers.  
31 958 *Physiol Behav* 2012;106(2):264-71. doi: 10.1016/j.physbeh.2012.01.021 [published Online First:  
32 959 2012/02/16]
- 33 960 108. Musher-Eizenman D, Holub S. Comprehensive Feeding Practices Questionnaire: validation of a new  
34 961 measure of parental feeding practices. *J Pediatr Psychol* 2007;32(8):960-72. doi:  
35 962 10.1093/jpepsy/jsm037 [published Online First: 2007/05/31]
- 36 963 109. Temple JL, Legierski CM, Giacomelli AM, et al. Overweight children find food more reinforcing and  
37 964 consume more energy than do nonoverweight children. *Am J Clin Nutr* 2008;87(5):1121-7. doi:  
38 965 10.1093/ajcn/87.5.1121 [published Online First: 2008/05/13]
- 39 966 110. Westat. National Health and Nutrition Examination Survey III Body Measurements  
40 967 (Anthropometry). Rockville, MD 1988.
- 41 968 111. Bush NR, Allison AL, Miller AL, et al. Socioeconomic Disparities in Childhood Obesity Risk:  
42 969 Association With an Oxytocin Receptor Polymorphism. *JAMA Pediatr* 2017;171(1):61-67. doi:  
43 970 10.1001/jamapediatrics.2016.2332 [published Online First: 2016/11/15]
- 44 971 112. Sathyanarayana S, Grady R, Redmon JB, et al. Anogenital distance and penile width measurements  
45 972 in The Infant Development and the Environment Study (TIDES): methods and predictors. *J*  
46 973 *Pediatr Urol* 2015;11(2):76.e1-6. doi: 10.1016/j.jpuro.2014.11.018 [published Online First:  
47 974 2015/04/01]
- 48 975 113. Manning JT, Scutt D, Wilson J, et al. The ratio of 2nd to 4th digit length: a predictor of sperm  
49 976 numbers and concentrations of testosterone, luteinizing hormone and oestrogen. *Hum Reprod*  
50 977 1998;13(11):3000-4. doi: 10.1093/humrep/13.11.3000 [published Online First: 1998/12/16]

1  
2  
3  
4  
5  
6  
7  
8  
9  
10  
11  
12  
13  
14  
15  
16  
17  
18  
19  
20  
21  
22  
23  
24  
25  
26  
27  
28  
29  
30  
31  
32  
33  
34  
35  
36  
37  
38  
39  
40  
41  
42  
43  
44  
45  
46  
47  
48  
49  
50  
51  
52  
53  
54  
55  
56  
57  
58  
59  
60

978 114. Grier A, Qiu X, Bandyopadhyay S, et al. Impact of prematurity and nutrition on the developing gut  
979 microbiome and preterm infant growth. *Microbiome* 2017;5(1):158. doi: 10.1186/s40168-017-  
980 0377-0 [published Online First: 2017/12/13]

981  
982

For peer review only

983 **Table 1. Summary of UPSIDE biospecimen collections.**

|                  | Prenatal<br>(trimesters) |   |   | Birth | Infant/Child postnatal<br>(months) |   |    |    |    |    |
|------------------|--------------------------|---|---|-------|------------------------------------|---|----|----|----|----|
|                  | 1                        | 2 | 3 |       | 1                                  | 6 | 12 | 24 | 36 | 48 |
| Blood            |                          |   |   |       |                                    |   |    |    |    |    |
| Serum            | M                        | M | M | UC    |                                    |   |    |    |    |    |
| Plasma           | M                        | M | M | UC    |                                    | C | C  |    |    | C  |
| Whole blood      |                          |   | M |       |                                    |   |    |    |    |    |
| Red blood cells  | M                        | M | M |       |                                    | C | C  |    |    | C  |
| Urine            | M                        | M | M |       | C                                  | C | C  |    |    | C  |
| Saliva           |                          |   |   |       |                                    |   |    |    |    |    |
| Diurnal (5x/day) | M                        | M | M |       |                                    |   |    |    |    |    |
| Stress response  |                          |   |   |       |                                    | C | C  | C  |    | C  |
| Oral microbiome  | M                        | M | M |       |                                    | C | C  | C  |    | C  |
| Vaginal swab     |                          |   | M |       |                                    |   |    |    |    |    |
| Placental tissue |                          |   |   | P     |                                    |   |    |    |    |    |
| Buccal swab      |                          |   | M | C     |                                    |   | C  | C  |    |    |
| Rectal swab      |                          |   |   | C     | C                                  | C | C  | C  |    |    |
| Stool            |                          |   |   |       | C                                  | C |    |    |    |    |
| Breast milk      |                          |   |   |       | M                                  | M |    |    |    |    |
| Nails            |                          |   |   |       |                                    |   | C  | C  |    |    |

984 M=maternal; C=child; UC=umbilical cord (artery and vein); P=placenta

985



986 **Table 2. Summary of UPSIDE child assessments.**

|                                                | Age at assessment (months) * |   |   |    |    |    |    |
|------------------------------------------------|------------------------------|---|---|----|----|----|----|
|                                                | birth                        | 1 | 6 | 12 | 24 | 36 | 48 |
| <b>Anthropometric measures</b>                 |                              |   |   |    |    |    |    |
| Height/weight                                  | x                            | x | x | x  | x  | x  | x  |
| Head circumference                             | x                            | x | x | x  | x  | x  | x  |
| Skinfold thickness                             | x                            | x | x | x  | x  | x  | x  |
| Anogenital distance                            | x                            | x | x | x  | x  |    |    |
| Waist circumference                            |                              |   |   |    |    | x  | x  |
| Digit ratio                                    |                              |   |   |    |    | x  | x  |
| <b>Neurodevelopmental measures (by domain)</b> |                              |   |   |    |    |    |    |
| <i>Temperament</i>                             |                              |   |   |    |    |    |    |
| Rothbart- IBQ                                  |                              |   | x | x  | x  |    |    |
| Lab-TAB                                        |                              |   | x | x  | x  |    |    |
| <i>Cognition/language/EF</i>                   |                              |   |   |    |    |    |    |
| BSID                                           |                              |   | x | x  | x  |    |    |
| WPPSI-IV                                       |                              |   |   |    |    |    | x  |
| Macarthur Bates                                |                              |   |   |    | x  | x  |    |
| NIH Toolbox                                    |                              |   |   |    | x  | x  |    |
| Executive function                             |                              |   |   |    | x  | x  |    |
| <i>Neuroimaging</i>                            |                              |   |   |    |    |    |    |
| MRI                                            |                              | x |   |    |    |    | x  |
| EEG                                            |                              |   |   |    | x  | x  |    |
| <i>Sex-typical/dimorphic</i>                   |                              |   |   |    |    |    |    |
| Face preference                                |                              | x | x |    |    |    |    |
| Toy preference                                 |                              |   | x | x  | x  |    |    |
| Social preference                              |                              |   | x | x  | x  |    |    |
| Mental rotation                                |                              |   | x | x  | x  | x  |    |
| Sex-typical play behavior                      |                              |   |   | x  | x  |    |    |
| <b>Lifestyle measures</b>                      |                              |   |   |    |    |    |    |
| Sleep                                          |                              | x | x | x  | x  | x  | x  |
| <i>Diet</i>                                    |                              |   |   |    |    |    |    |
| Infant feeding questionnaire                   |                              | x | x | x  |    |    |    |
| 24-hour dietary recall                         |                              |   |   |    |    | x  |    |
| Eating behavior                                |                              |   |   |    |    | x  |    |

\* 6, 12, 24, 36 month visits are ongoing and 48 month visits will start in early 2021.

Abbreviations: BSID: Bayley Scales of Infant Development; EEG: Electroencephalogram; EF: Executive function; IBQ: Infant Behavior Questionnaire; MRI: Magnetic Resonance Imaging; NIH: National Institutes of Health; WPPSI: Wechsler Preschool and Primary Scale of Intelligence

992 **Table 3. Baseline characteristics of mother-child dyads participating in UPSIDE**  
 993 **(n=294<sup>1</sup>).**

|                                             | Mean (SD)      | Min-Max     | n (%)      |
|---------------------------------------------|----------------|-------------|------------|
| <b>Maternal characteristics<sup>2</sup></b> |                |             |            |
| <b>Continuous/ordinal</b>                   |                |             |            |
| Age (years)                                 | 28.9 (4.7)     | 18-41       |            |
| Pre-pregnancy BMI (kg/m <sup>2</sup> )      | 27.2 (6.9)     | 16.98-49.77 |            |
| Poverty to income ratio                     | 3.8 (3.9)      | 0.04-44.6   |            |
| Household size (persons)                    | 3.2 (1.5)      | 1-11        |            |
| Sleep (Pittsburgh Sleep Index)              | 6.3 (3.5)      | 0-17        |            |
| <b>Categorical</b>                          |                |             |            |
| Race                                        |                |             |            |
| White                                       |                |             | 180 (61.2) |
| Black                                       |                |             | 75 (25.5)  |
| Asian                                       |                |             | 11 (3.7)   |
| Mixed Race                                  |                |             | 8 (2.7)    |
| Other <sup>3</sup>                          |                |             | 20 (6.8)   |
| Hispanic                                    |                |             | 29 (9.9)   |
| Education                                   |                |             |            |
| <High school                                |                |             | 8 (2.9)    |
| High school                                 |                |             | 85 (31.3)  |
| Some college                                |                |             | 39 (14.3)  |
| College degree                              |                |             | 70 (25.7)  |
| Post-college degree                         |                |             | 70 (25.7)  |
| Employed                                    |                |             | 215 (74.9) |
| Married/living as married                   |                |             | 173 (60.3) |
| Medicaid status                             |                |             | 110 (42.1) |
| Nulliparous                                 |                |             | 82 (31.3)  |
| Smoking during pregnancy (any)              |                |             | 23 (7.8)   |
| Alcohol use during pregnancy (any)          |                |             | 10 (3.4)   |
| <b>Paternal characteristics<sup>2</sup></b> |                |             |            |
| Age (years)                                 | 30.9 (5.6)     | 18 – 57     |            |
| Race                                        |                |             |            |
| White                                       |                |             | 170 (59.9) |
| Black                                       |                |             | 79 (27.8)  |
| Asian                                       |                |             | 5 (1.8)    |
| Other <sup>3</sup>                          |                |             | 30 (10.6)  |
| <b>Infant characteristics</b>               |                |             |            |
| Female                                      |                |             | 152 (51.7) |
| Gestational age at birth (weeks)            | 39.5 (1.6)     | 27.7-42.7   |            |
| Birth weight (g)                            | 3352.8 (495.0) | 2195-4654   |            |
| Birth length (cm)                           | 51.1 (3.1)     | 40-60       |            |

994 1 n's for individual variables may differ slightly due to missing data

995 2 At time of enrollment, with the exception of Sleep which was assessed in the second trimester.

996 3 "Other" includes American Indian/Alaska Native and individuals self-reporting as "other".

**Table 4. Psychosocial assessments repeated across pregnancy.**

| Scale                      | Trimester 1           | Trimester 2           | Trimester 3           | ICC |
|----------------------------|-----------------------|-----------------------|-----------------------|-----|
|                            | mean±SD; (range)      | mean±SD; (range)      | mean±SD; (range)      |     |
| Depressive Symptoms (EPDS) | 5.56 ± 4.73 (0-21)    | 5.94 ± 4.93 (0-23)    | 5.95 ± 5.13 (0-29)    | .73 |
| Anxiety Symptoms (PSWQ)    | 44.41 ± 13.36 (16-77) | 44.09 ± 13.72 (17-80) | 44.31 ± 13.69 (16-80) | .80 |
| Pregnancy Specific Anxiety |                       |                       |                       |     |
| Worries about the baby     | 7.97 ± 4.3 (4-20)     | 7.24 ± 3.77 (4-20)    | 7.18 ± 3.99 (4-20)    | .68 |
| Worries about delivery     | 6.96 ± 3.64 (3-15)    | 6.65 ± 3.46 (3-15)    | 7.19 ± 3.47 (3-15)    | .72 |
| Perceived Stress (PSS)     | 19.9 ± 8.11 (2-42)    | 20.03 ± 8.1 (0-49)    | 19.83 ± 8.03 (2-39)   | .77 |

Abbreviations: EPDS: Edinburgh Postnatal Depression Scale; ICC: Interclass correlation coefficient; PSS:

Perceived Stress; PSWQ: Penn State Worry Questionnaire

1  
2  
3 1005 **Figure 1. Consort figure on recruitment and retention in the UPSIDE study (n=326).**  
4  
5 1006  
6 1007  
7 1008  
8 1009  
9  
10  
11  
12  
13  
14  
15  
16  
17  
18  
19  
20  
21  
22  
23  
24  
25  
26  
27  
28  
29  
30  
31  
32  
33  
34  
35  
36  
37  
38  
39  
40  
41  
42  
43  
44  
45  
46  
47  
48  
49  
50  
51  
52  
53  
54  
55  
56  
57  
58  
59  
60

For peer review only

1  
2  
3  
4  
5  
6  
7  
8  
9  
10  
11  
12  
13  
14  
15  
16  
17  
18  
19  
20  
21  
22  
23  
24  
25  
26  
27  
28  
29  
30  
31  
32  
33  
34  
35  
36  
37  
38  
39  
40  
41  
42  
43  
44  
45  
46  
47  
48  
49  
50  
51  
52  
53  
54  
55  
56  
57  
58  
59  
60

**Figure 2. Timing of placental delivery in relation to standard work hours (spontaneous births only).**

For peer review only

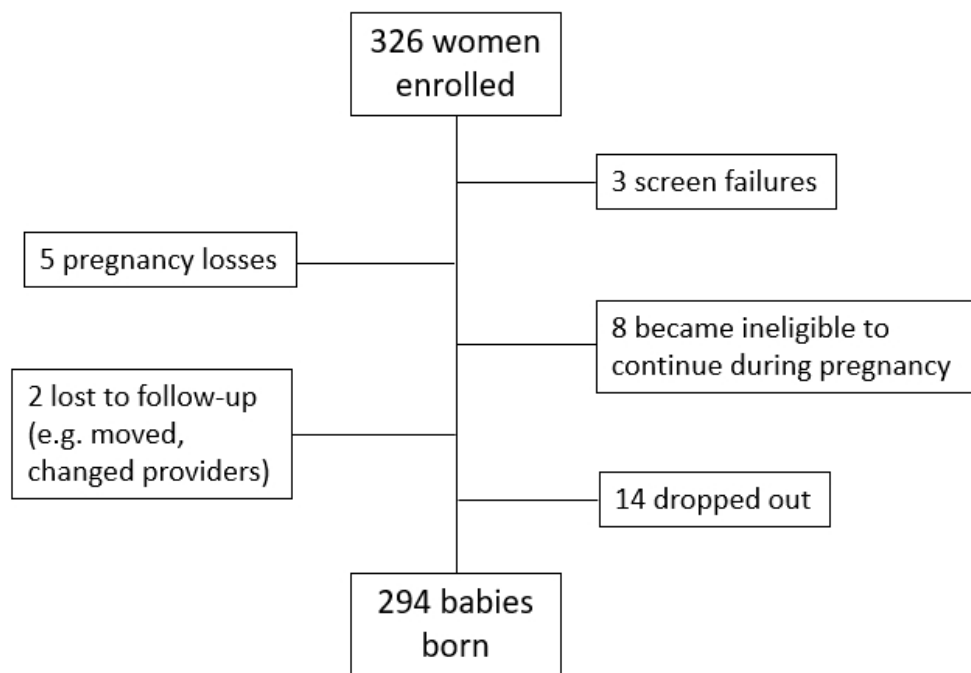

28  
29  
30  
31  
32  
33  
34  
35  
36  
37  
38  
39  
40  
41  
42  
43  
44  
45  
46  
47  
48  
49  
50  
51  
52  
53  
54  
55  
56  
57  
58  
59  
60

Figure 1. Consort figure on recruitment and retention in the UPSIDE study (n=326).

1  
2  
3  
4  
5  
6  
7  
8  
9  
10  
11  
12  
13  
14  
15  
16  
17  
18  
19  
20  
21  
22  
23  
24  
25  
26  
27  
28  
29  
30  
31  
32  
33  
34  
35  
36  
37  
38  
39  
40  
41  
42  
43  
44  
45  
46  
47  
48  
49  
50  
51  
52  
53  
54  
55  
56  
57  
58  
59  
60

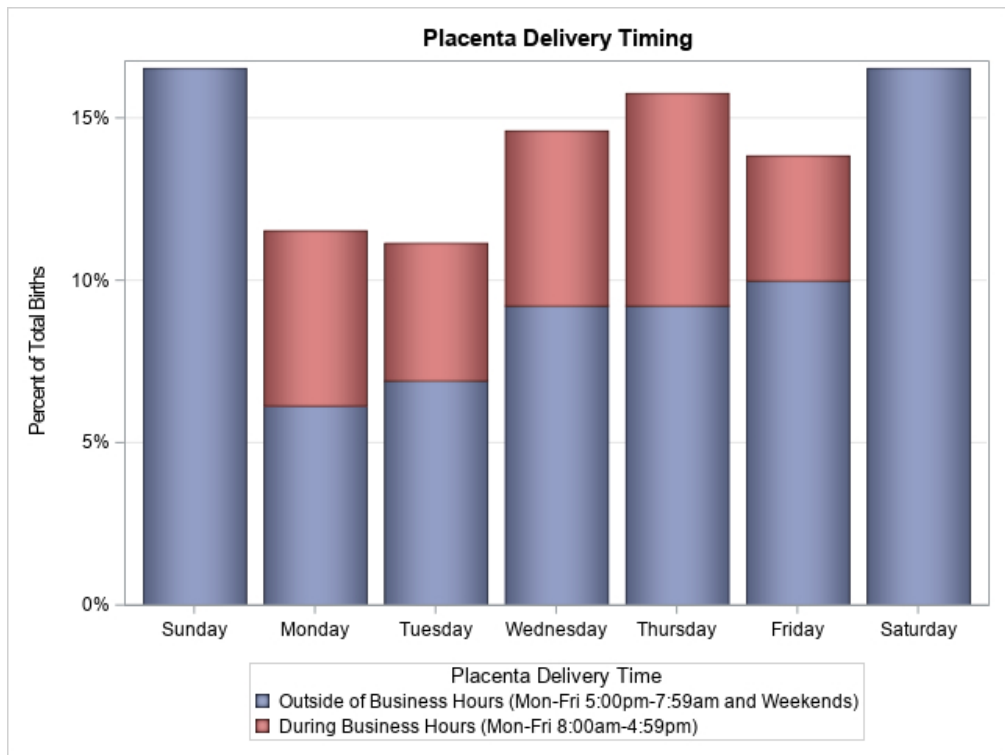

Figure 2. Timing of placental delivery in relation to standard work hours (spontaneous births only).
